# Supplementary material for: Design of Antibacterial Agents: Alkyl Dihydroxybenzoates against Xanthomonas citri subsp. citri
Source: PubMed Central journal article supplement (PMC6213047; doi:10.3390/ijms19103050), 2018-10-06
Supplement: ijms-19-03050-s001.pdf [file ijms-19-03050-s001.pdf]

2

3 **Design of Antibacterial Agents: Alkyl Dihydroxybenzoates**

4 **Against *Xanthomonas citri* subsp. *citri***

5

6 Ana Carolina Nazaré<sup>1,\*</sup>, Carlos Roberto Polaquini<sup>1</sup>, Lucia Bonci Cavalca<sup>2</sup>, Daiane

7 Bertholin Anselmo<sup>1</sup>, Marilia de Freitas Calmon Saiki<sup>3</sup>, Diego Alves Monteiro<sup>3</sup>, Paula

8 Rahal<sup>3</sup>, Eleni Gomes<sup>3</sup>, Dirk-Jan Scheffers<sup>4</sup>, Henrique Ferreira<sup>2</sup> and Luis Octavio

9 Regasini<sup>1,\*</sup>

10

11 <sup>1</sup>Department of Chemistry and Environmental Sciences, Institute of Biosciences,  
12 Humanities and Exact Sciences, São Paulo State University (UNESP), São José do Rio  
13 Preto, SP, Brazil

14 <sup>2</sup>Department of Biochemistry and Microbiology, Biosciences Institute, São Paulo State  
15 University (UNESP), Rio Claro, SP, Brazil

16 <sup>3</sup>Department of Biology, Institute of Biosciences, Humanities and Exact Sciences, São  
17 Paulo State University (UNESP), São José do Rio Preto, SP, Brazil

18 <sup>4</sup>Department of Molecular Microbiology, Groningen Biomolecular Sciences and  
19 Biotechnology Institute, University of Groningen, Groningen, Netherlands

20

21 \* Corresponding author Tel.: +55 17 3221-2362

22 e-mail: acarolnazare@gmail.com (A. C. Nazaré) and luis.regasini@unesp.br (L.O.  
23 Regasini)

## 25 1. SPECTROSCOPY DATA ANALYSES

26 The purity of compounds was measured on HPLC-PAD equipment, the analysis  
27 were performed for calculations of partition coefficient, using MeOH:H<sub>2</sub>O (3:1) as  
28 isocratic mobile phase. The NMR spectra were recorded on a Bruker Avance III 14.1 T  
29 (600 MHz), Bruker Avance III 9.4 T (400 MHz) and Bruker Fourier 7.1 T (300 MHz)  
30 spectrometers, using CDCl<sub>3</sub> or DMSO-*d*<sub>6</sub> as solvent. The chemical shifts ( $\delta$ ) and coupling  
31 constants (*J*) were expressed in ppm and Hz, respectively. Multiplicities were reported as  
32 singlet (s), doublet (d), doublet of doublet (dd), triplet (t), quartet (q), and septet (sp).

33

### 34 1.1 ethyl 2,4 dihydroxybenzoate (1)

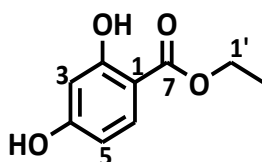

35

36 Pale yellow solid

37 **Yield:** 20 %

38 **Purity:** 87.6 %

39 **<sup>1</sup>H NMR (400 MHz, CDCl<sub>3</sub>)  $\delta$ <sub>H</sub> in ppm (multiplicity; *J* in Hz):** 11.09 (s, 2-OH), 7.77  
40 (d, 8.8, H-6), 6.42 (d, 2.4, H-3), 6.39 (dd, 8.8 and 2.4, H-5), 5.92 (s; 4-OH), 4.39 (q, 7.2,  
41 H-1'), 1.42 (t, 7.2, H-2')

42 **<sup>13</sup>C NMR (100 MHz, CDCl<sub>3</sub>)  $\delta$ <sub>C</sub> in ppm:** 170.0 (C-7), 163.6 (C-4), 162.0 (C-2), 131.9  
43 (C-3), 107.8 (C-5), 106.1 (C-1), 103.1 (C-6), 61.1 (C-1'), 14.2 (C-2')

44

### 45 1.2 butyl 2,4 dihydroxybenzoate (2)

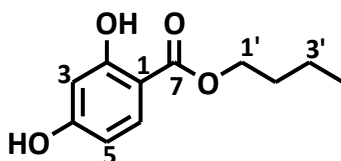

46

47 White crystal

48 **Yield:** 98 %

49 **Purity:** 85.6 %

50 **<sup>1</sup>H NMR(400 MHz, CDCl<sub>3</sub>) δ<sub>H</sub> in ppm (multiplicity; J in Hz):** 11.09 (s, 2-OH), 7.76  
51 (d, 8.4, H-6), 6.42 (d, 2.4, H-3), 6.39 (dd, 8.4 and 2.4, H-5), 5.93 (s, 4-OH), 4.34 (t, 6.4,  
52 H-1'), 1.81–1.73 (H-2'), 1.54–1.45 (H-3'), 1.00 (t, 7.6, H-4')

53 **<sup>13</sup>C NMR (100 MHz, CDCl<sub>3</sub>) δ<sub>C</sub> in ppm:**170.1 (C-7), 163.6 (C-4), 162.0 (C-2), 131.9  
54 (C-3), 107.8 (C-5), 106.1 (C-1), 103.1 (C-6), 64.9 (C-1'), 30.6 (C-2'), 19.2 (C-3'), 13.7  
55 (C-4')

56

57 1.3 hexyl 2,4 dihydroxybenzoate (**3**)

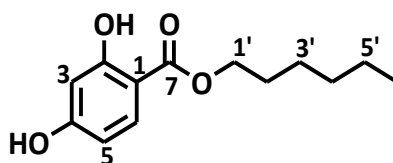

58

59 White crystal

60 **Yield:** 92 %

61 **Purity:** 81.7 %

62 **<sup>1</sup>H NMR (400 MHz, CDCl<sub>3</sub>) δ<sub>H</sub> in ppm (multiplicity; J in Hz):** 11.08 (s, 2-OH), 7.76  
63 (d, 8.8, H-6), 6.42 (d, 2.4, H-3), 6.39 (dd, 8.8 and 2.4, H-5), 5.83 (s, 4-OH), 4.33 (t, 6.8,  
64 H-1'), 1.80–1.76 (H-2'), 1.47–1.36 (H-3'–H-5'), 0.93 (t, 6.8, H-6')

65 **<sup>13</sup>C NMR (100 MHz, CDCl<sub>3</sub>) δ<sub>C</sub> in ppm:** 170.1 (C-7), 163.7 (C-4), 162.0 (C-2), 131.9  
66 (C-3), 107.7 (C-5), 106.1 (C-1), 103.1 (C-6), 65.2 (C-1'), 31.4, 28.6, 25.6, and 22.5 (C-  
67 2'–C-5'), 14.0 (C-6')

68

69 1.4 heptyl 2,4 dihydroxybenzoate (**4**)

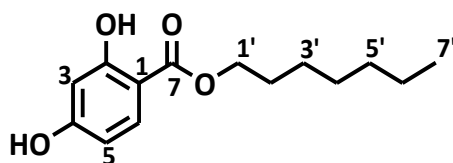

70

71 White crystal

72 **Yield:** 82 %

73 **Purity:** 83.8 %

74 **<sup>1</sup>H NMR (600 MHz, CDCl<sub>3</sub>) δ<sub>H</sub> in ppm (multiplicity; *J* in Hz):** 11.09 (s, 2-OH), 7.76

75 (d, 9.0, H-6), 6.42 (d, 2.4, H-3), 6.40 (dd, 9.0 and 2.4, H-5), 5.90 (s, 4-OH), 4.32 (t, 6.7,

76 H-1'), 1.80–1.76 (H-2'), 1.47–1.27 (H-3'–H-6'), 0.91 (t, 6.9, CH<sub>3</sub>)

77 **<sup>13</sup>C NMR (150 MHz, CDCl<sub>3</sub>) δ<sub>C</sub> in ppm:** 170.1 (C-7), 163.7 (C-4), 161.9 (C-2), 131.9

78 (C-3), 107.7 (C-5), 106.1 (C-1), 103.1 (C-6), 65.2 (C-1'), 31.7, 28.9, 28.6, 25.9, and 22.6

79 (C-2'–C-6'), 14.1 (C-7')

80

81 1.5 octyl 2,4 dihydroxybenzoate (5)

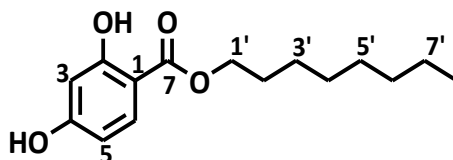

82

83 White crystal

84 **Yield:** 82 %

85 **Purity:** 79.6 %

86 **<sup>1</sup>H NMR (400 MHz, CDCl<sub>3</sub>) δ<sub>H</sub> in ppm (multiplicity; *J* in Hz):** 7.74 (d, 8.4, H-6), 6.40–

87 6.37 (H-3 and H-5), 4.31 (t, 6.4, H-1'), 1.80–1.73 (H-2'), 1.46–1.30 (H-3'–H-7'), 0.91 (t,

88 6.4, H-8')

89 **<sup>13</sup>C NMR (100 MHz, CDCl<sub>3</sub>) δ<sub>C</sub> in ppm:** 170.7 (C-7), 163.6 (C-4), 162.2 (C-2), 131.9

90 (C-3), 107.9 (C-5), 106.0 (C-1), 103.1 (C-6), 65.2 (C-1'), 31.8, 29.2, 29.1, 28.6, 26.0, and

91 22.6 (C-2'–C-7'), 14.1 (H-8')

92

93 1.6 nonyl 2,4 dihydroxybenzoate (6)

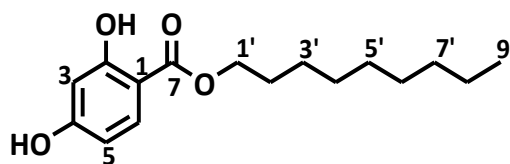

94

95 White crystal

96 **Yield:** 98 %

97 **Purity:** 99.0 %

98 **<sup>1</sup>H NMR (600 MHz, CDCl<sub>3</sub>) δ<sub>H</sub> in ppm (multiplicity; J in Hz):** 11.08 (s, 2-OH), 7.76

99 (d, 8.8, H-6), 6.42 (d, 2.4, H-3), 6.39 (dd, 8.8 and 2.4, H-5), 5.83 (s, 4-OH), 4.35 (t, 6.7,

100 H-1'), 1.81–1.76 (H-2'), 1.47–1.29 (H-3'–H-8'), 0.90 (t, 6.8, H-9')

101 **<sup>13</sup>C NMR (100 MHz, CDCl<sub>3</sub>) δ<sub>C</sub> in ppm:** 170.1 (C-7), 163.6 (C-4), 162.0 (C-2), 131.9

102 (C-3), 107.8 (C-5), 106.1 (C-1), 103.1 (C-6), 65.2 (C-1'), 31.9, 29.5, 29.2, 28.6, 26.0, and

103 22.7 (C-2'–C-8'), 14.1 (C-9')

104

105 1.7 decyl 2,4 dihydroxybenzoate (7)

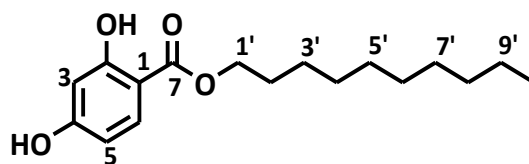

106

107 Pale yellow solid

108 **Yield:** 95 %

109 **Purity:** 99.5 %

110 **<sup>1</sup>H NMR (400 MHz, CDCl<sub>3</sub>) δ<sub>H</sub> in ppm (multiplicity; J in Hz):** 11.08 (s, 2-OH), 7.76

111 (d, 8.4 Hz, H-6), 6.42 (d, 2.4, H-3), 6.39 (dd, 8.4 and 2.4, H-5), 5.65 (s, 4-OH), 4.33 (t,

112 6.4, H-1'), 1.81–1.74 (H-2'), 1.47–1.29 (H-3'–H-9'), 0.90 (t, 6.8, H-10')

113 <sup>13</sup>C NMR (100 MHz, CDCl<sub>3</sub>) δ<sub>C</sub> in ppm: 170.1 (C-7), 163.6 (C-4), 162.0 (C-2), 131.9  
114 (C-3), 107.8 (C-5), 106.1 (C-1), 103.1 (C-6), 65.3 (C-1'), 31.9, 29.5, 29.3, 29.2, 28.6,  
115 26.0, and 22.7 (C-2'–C-9'), 14.1 (C-10')

116

117 1.8 dodecyl 2,4 dihydroxybenzoate (**8**)

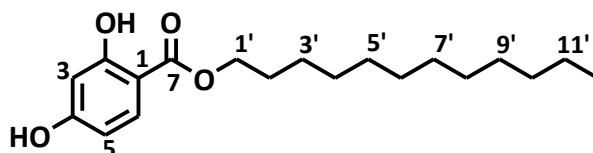

118

119 White crystal

120 **Yield:** 99 %

121 **Purity:** > 99.9 %

122 <sup>1</sup>H NMR (300 MHz, CDCl<sub>3</sub>) δ<sub>H</sub> in ppm (multiplicity; *J* in Hz): 11.07 (s, 2-OH), 7.75  
123 (d, 8.4, H-6), 6.41 (d, 2.1, H-3) 6.38 (dd, 8.4 and 2.1, H-5), 5.68 (s, 4-OH), 4.31 (t, 6.6,  
124 H-1'), 1.81–1.72 (H-2'), 1.43–1.27 (H-3'–H-11'), 0.89 (t, 6.6, H-12')

125 <sup>13</sup>C NMR (100 MHz, CDCl<sub>3</sub>) δ<sub>C</sub> in ppm: 170.1 (C-7), 163.7 (C-4), 162.0 (C-2), 131.8  
126 (C-3), 107.8 (C-5), 106.1 (C-1), 103.1 (C-6), 65.2 (C-1'), 31.9, 29.7, 29.6, 29.5, 29.4,  
127 29.3, 29.2, 28.6, 26.0, and 22.7 (C-2'–C-11'), 14.1 (C-12')

128

129 1.9 isopropyl 2,4 dihydroxybenzoate (**9**)

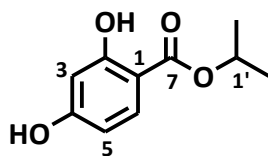

130

131 Brown oil

132 **Yield:** 68 %

133 **Purity:** 93.2 %

134 **<sup>1</sup>H NMR (600 MHz, CDCl<sub>3</sub>) δ<sub>H</sub> in ppm (multiplicity; J in Hz):** 11.21 (s, 2-OH), 7.75  
135 (d, 9.0, H-6), 6.42 (d, 2.4, H-3), 6.39 (dd, 9.0 and 2.4, H-5), 5.27 (sp, 6.6, H-1'), 1.39 (d,  
136 6.6, H-2')

137 **<sup>13</sup>C NMR (150 MHz, CDCl<sub>3</sub>) δ<sub>C</sub> in ppm:** 169.7 (C-7), 163.6 (C-4), 162.0 (C-2), 131.9  
138 (C-3), 107.8 (C-5), 106.3 (C-1), 103.0 (C-6), 68.9 (C-1'), 21.9 (C-2')

139

140 1.10 cyclopentyl 2,4 dihydroxybenzoate (**10**)

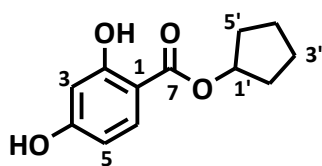

141

142 White crystal

143 **Yield:** 40 %

144 **Purity:** > 99.9 %

145 **<sup>1</sup>H NMR (600 MHz, CDCl<sub>3</sub>) δ<sub>H</sub> in ppm (multiplicity; J in Hz):** 11.17 (s, 2-OH), 7.72  
146 (d, 8.4, H-6), 6.41 (d, 2.4, H-3), 6.38 (dd, 8.4 and 2.4, H-5), 5.44– 5.41 (H-1'), 2.03–1.59  
147 (H-2'–H-5')

148 **<sup>13</sup>C NMR (150 MHz, CDCl<sub>3</sub>) δ<sub>C</sub> in ppm:** 169.5 (C-7), 163.7 (C-4), 161.9 (C-2), 131.9  
149 (C-3), 107.7 (C-5), 106.5 (C-1), 103.1 (C-6), 73.5 (C-1'), 31.6 (C-2' and C-5'), 23.6 (C-  
150 3' and C-4')

151

152 1.11 cyclohexyl 2,4 dihydroxybenzoate (**11**)

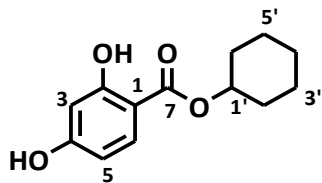

153

154 Brown oil

155 **Yield:** 92 %

156 **Purity:** > 99.9%

157 **<sup>1</sup>H NMR (600 MHz, CDCl<sub>3</sub>) δ<sub>H</sub> in ppm (multiplicity; J in Hz):** 11.18 (s, 2-OH), 7.78  
158 (d, 8.4, H-6), 6.42 (d, 2.4, H-3), 6.39 (dd, 8.4 and 2.4, H-5), 5.83 (s, 4-OH), 5.07– 5.02  
159 (H-1'), 1.97–1.34 (H-2'–H-6')

160 **<sup>13</sup>C NMR (150 MHz, CDCl<sub>3</sub>) δ<sub>C</sub> in ppm:** 169.5 (C-7), 163.7 (C-4), 161.9 (C-2), 131.9  
161 (C-3), 107.7 (C-5), 106.5 (C-1), 103.1 (C-6), 73.5 (C-1'), 31.6 (C-2' and C-6'), 25.4 (C-  
162 4'), 23.6 (C-3' and C-5')

163

164 1.13 ethyl 2,5 dihydroxybenzoate (**13**)

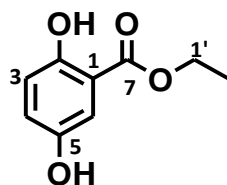

165

166 Pale yellow crystal

167 **Yield:** 32 %

168 **Purity:** 98.3 %

169 **<sup>1</sup>H NMR (400 MHz, CDCl<sub>3</sub>) δ<sub>H</sub> in ppm (multiplicity; J in Hz):** 10.44 (s, 2-OH), 7.32  
170 (d, 3.2, H-6), 7.03 (dd, 8.8 and 3.2, H-4), 6.89 (d, 8.8, H-3), 4.41 (q, 7.2, H-1'), 1.42 (t,  
171 7.2, H-2')

172 **<sup>13</sup>C NMR (100 MHz, CDCl<sub>3</sub>) δ<sub>C</sub> in ppm:** 169.8 (C-7), 155.8 (C-2), 147.7 (C-5), 123.9  
173 (C-4), 118.5 (C-3), 114.8 (C-6), 112.4 (C-1), 61.5 (C-1'), 14.2 (C-2')

174

175 1.14 butyl 2,5 dihydroxybenzoate (**14**)



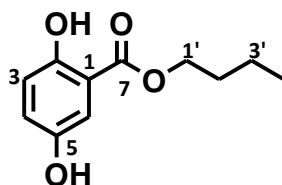

176

177 Pale yellow crystal

178 **Yield:** 87 %

179 **Purity:** 82.0 %

180 **<sup>1</sup>H NMR (400 MHz, CDCl<sub>3</sub>) δ<sub>H</sub> in ppm (multiplicity; *J* in Hz):** 10.44 (s, 2-OH), 7.31

181 (d, 2.8, H-6), 7.03 (dd, 8.8 and 2.8, H-4), 6.90 (d, 8.8, H-3), 4.90 (s; 5-OH), 4.36 (t, 6.8,

182 H-1'), 1.81–1.74 (H-2'), 1.54–1.45 (H-3'), 1.01 (t, 7.2, H-4')

183 **<sup>13</sup>C NMR (100 MHz, CDCl<sub>3</sub>) δ<sub>C</sub> in ppm:** 169.8 (C-7), 155.9 (C-2), 147.7 (C-5), 123.9

184 (C-4), 118.5 (C-3), 114.7 (C-6), 112.5 (C-1), 65.3 (C-1'), 30.6 (C-2'), 19.2 (C-3'), 13.7

185 (C-4')

186

187 1.15 hexyl 2,5 dihydroxybenzoate (**15**)

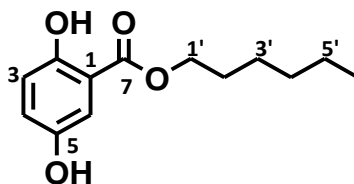

188

189 Pale yellow oil

190 **Yield:** 67 %

191 **Purity:** 80.1 %

192 **<sup>1</sup>H NMR (400 MHz, CDCl<sub>3</sub>) δ<sub>H</sub> in ppm (multiplicity; *J* in Hz):** 10.44 (s, 2-OH), 7.31

193 (d, 3.2, H-6), 7.03 (dd, 9.2 and 3.2, H-4), 6.89 (d, 9.2, H-3), 4.35 (t, 6.8, H-1'), 1.83–1.75

194 (H-2'), 1.48–1.36 (H-3'–H-5'), 0.93 (t, 6.8, H-6')

195  $^{13}\text{C}$  NMR (100 MHz,  $\text{CDCl}_3$ )  $\delta_{\text{C}}$  in ppm: 169.8 (C-7), 155.9 (C-2), 147.7 (C-5), 123.9  
196 (C-4), 118.5 (C-3), 114.7 (C-6), 112.5 (C-1), 65.6 (C-1'), 31.4, 28.5, 25.6, and 22.5 (C-  
197 2'-C-5'), 14.0 (C-6')

198

199 1.16 heptyl 2,5 dihydroxybenzoate (**16**)

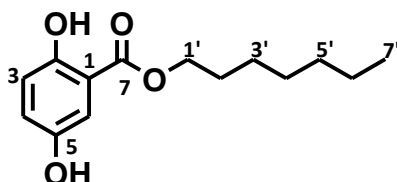

200

201 Pale yellow crystal

202 **Yield:** 40 %

203 **Purity:** 99.3 %

204  $^1\text{H}$  NMR (600 MHz,  $\text{CDCl}_3$ )  $\delta_{\text{H}}$  in ppm (multiplicity;  $J$  in Hz): 10.45 (s, 2-OH), 7.31  
205 (d, 3.0, H-6), 7.03 (dd, 9.0 and 3.0, H-4), 6.90 (d, 9.0, H-3), 4.35 (t, 6.7, H-1'), 1.81–1.77  
206 (H-2'), 1.48–1.27 (H-3'–H-6'), 0.92 (t, 6.9, H-7')

207  $^{13}\text{C}$  NMR (150 MHz,  $\text{CDCl}_3$ )  $\delta_{\text{C}}$  in ppm: 169.8 (C-7), 155.9 (C-2), 147.6 (C-5), 123.9  
208 (C-4), 118.5 (C-3), 114.7 (C-6), 112.5 (C-1), 65.6 (C-1'), 31.7, 28.9, 28.6, 25.9, and 22.6  
209 (C-2'–C6'), 14.1 (C-7')

210

211 1.17 octyl 2,5 dihydroxybenzoate (**17**)

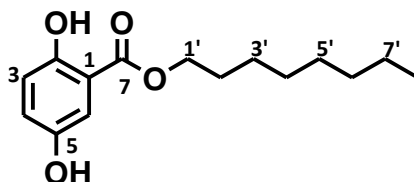

212

213 Pale yellow crystal

214 **Yield:** 95 %

215 **Purity:** 79.8 %

216 **<sup>1</sup>H NMR (400 MHz, CDCl<sub>3</sub>) δ<sub>H</sub> in ppm (multiplicity; J in Hz):** 10.45 (s, 2-OH), 7.31  
217 (d, 3.2, H-6), 7.03 (dd, 9.2 and 3.2, H-4), 6.90 (d, 9.2, H-3), 4.35 (t, 6.8, H-1'), 1.82–1.75  
218 (H-2'), 1.49–1.31 (H-3'–H-7'), 0.91 (t, 6.8, H-8')

219 **<sup>13</sup>C NMR (100 MHz, CDCl<sub>3</sub>) δ<sub>C</sub> in ppm:** 169.8 (C-7), 155.9 (C-2), 147.7 (C-5), 123.9  
220 (C-4), 118.5 (C-3), 114.8 (C-6), 112.5 (C-1), 65.7 (C-1'), 31.8, 29.2, 29.1, 28.5, 26.0, and  
221 22.6 (C-2'–C7'), 14.1 (C-8')

222

223 1.18 nonyl 2,5 dihydroxybenzoate (**18**)

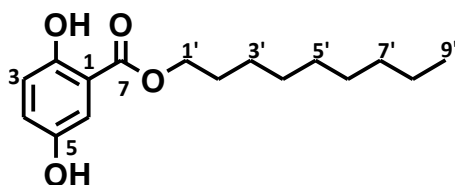

224

225 Pale yellow crystal

226 **Yield:** 99 %

227 **Purity:** > 99.9 %

228 **<sup>1</sup>H NMR (600 MHz, CDCl<sub>3</sub>) δ<sub>H</sub> in ppm (multiplicity; J in Hz):** 10.46 (s, 2-OH), 7.31  
229 (d, 3.0, H-6), 7.03 (dd, 9.0 and 3.0, H-4), 6.90 (d, 9.0, H-3), 4.35 (t, 6.7, H-1'), 1.81–1.76  
230 (H-2'), 1.47–1.29 (H-3'–H-8'), 0.90 (t, 6.8, H-9')

231 **<sup>13</sup>C NMR (150 MHz, CDCl<sub>3</sub>) δ<sub>C</sub> in ppm:** 169.9 (C-7), 155.8 (C-2), 147.7 (C-5), 123.9  
232 (C-4), 118.5 (C-3), 114.7 (C-6), 112.5 (C-1), 65.7 (C-1'), 31.9, 29.5, 29.3, 28.5, 26.0, and  
233 22.7 (C-2'–C-8'), 14.1 (C-9')

234

235 1.19 decyl 2,5 dihydroxybenzoate (**19**)

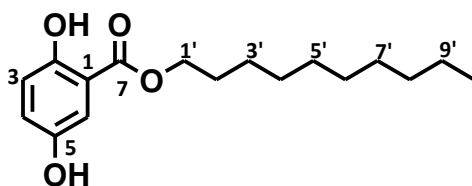

236

237 Pale yellow crystal

238 **Yield:** 70 %

239 **Purity:** 76.5 %

240  **$^1\text{H}$  NMR (400 MHz,  $\text{CDCl}_3$ )  $\delta_{\text{H}}$  in ppm (multiplicity;  $J$  in Hz):** 10.44 (s, 2-OH), 7.31  
241 (d, 3.2, H-6), 7.02 (dd, 9.2 and 3.2, H-4), 6.90 (d, 9.2, H-3), 4.84 (s, 5-OH), 4.35 (t, 6.4,  
242 H-1'), 1.82–1.75 (H-2'), 1.47–1.30 (H-3'–H-9'), 0.90 (t, 6.8, H-10')

243  **$^{13}\text{C}$  NMR (100 MHz,  $\text{CDCl}_3$ )  $\delta_{\text{C}}$  in ppm:** 169.8 (C-7), 155.9 (C-2), 147.7 (C-5), 123.9  
244 (C-4), 118.5 (C-3), 114.8 (C-6), 112.5 (C-1), 65.6 (C-1'), 31.9, 29.6, 29.5, 29.3, 29.2,  
245 28.5, 26.0, and 22.7 (C-2'–C-9'), 14.1 (C-10')

246

247 1.20 dodecyl 2,5 dihydroxybenzoate (**20**)

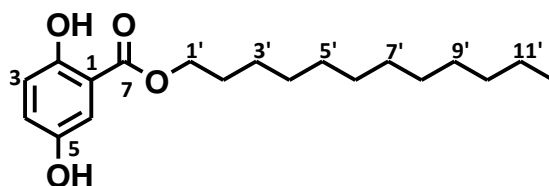

248

249 Pale yellow crystal

250 **Yield:** 99 %

251 **Purity:** > 99.9 %

252  **$^1\text{H}$  NMR (300 MHz,  $\text{CDCl}_3$ )  $\delta_{\text{H}}$  in ppm (multiplicity;  $J$  in Hz):** 10.43 (s, 2-OH), 7.30  
253 (d, 3.3, H-6), 7.02 (dd, 8.7 and 3.3, H-4), 6.89 (d, 8.7, H-3), 4.34 (t, 6.6, H-1'), 1.82–1.73  
254 (H-2'), 1.42–1.27 (H-3'–H-11'), 0.89 (t, 6.3, H-12')

255  **$^{13}\text{C}$  NMR (100 MHz,  $\text{CDCl}_3$ )  $\delta_{\text{C}}$  in ppm:** 169.8 (C-7), 155.9 (C-2), 147.7 (C-5), 123.9  
256 (C-4), 118.5 (C-3), 114.7 (C-6), 112.5 (C-1), 65.6 (C-1'), 31.9, 29.7, 29.6, 29.5, 29.3,  
257 29.2, 28.6, 26.0, and 22.7 (C-2'–C-11'), 14.1 (C-12')

258

259 1.21 isopropyl 2,5 dihydroxybenzoate (**21**)

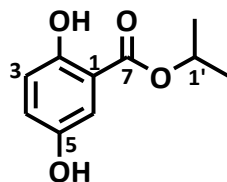

260

261 Pale yellow solid

262 **Yield:** 80 %

263 **Purity:** > 99.9 %

264 **<sup>1</sup>H NMR (400 MHz, CDCl<sub>3</sub>) δ<sub>H</sub> in ppm (multiplicity; *J* in Hz):** 10.51 (s, 2-OH), 7.31

265 (d, 3.2, H-6), 7.02 (dd, 9.2 and 3.2, H-4), 6.89 (d, 9.2, H-3), 5.29 (sp, 6.4, H-1')

266 6.4, H-2')

267 **<sup>13</sup>C NMR (150 MHz, CDCl<sub>3</sub>) δ<sub>C</sub> in ppm:** 169.3 (C-7), 155.9 (C-2), 147.6 (C-5), 123.8

268 (C-4), 118.4 (C-3), 114.8 (C-6), 112.8 (C-1), 69.4 (C-1'), 21.8 (C-2')

269

270 1.22 cyclopentyl 2,5 dihydroxybenzoate (**22**)

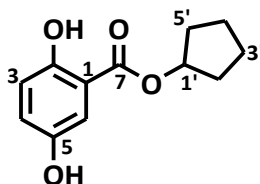

271

272 White solid

273 **Yield:** 75 %

274 **Purity:** > 99.9 %

275 **<sup>1</sup>H NMR (300 MHz, CDCl<sub>3</sub>) δ<sub>H</sub> in ppm (multiplicity; *J* in Hz):** 10.50 (s, 2-OH), 7.27

276 (d, 3.0, H-6), 7.00 (dd, 9.0 and 3.0, H-4), 6.88 (d, 9.0, H-3), 5.45–5.41 (H-1')

277 OH), 1.97–1.67 (H-2'–H-5')

278 **<sup>13</sup>C NMR (150 MHz, CDCl<sub>3</sub>) δ<sub>C</sub> in ppm:** 169.5 (C-7), 155.9 (C-2), 147.5 (C-5), 123.7

279 (C-4), 118.4 (C-3), 114.8 (C-6), 112.8 (C-1), 78.6 (C-1'), 32.7 (C-2' and C-5'), 23.8 (C-

280 3' and C-4')

281

282 1.23 cyclohexyl 2,5 dihydroxybenzoate (**23**)

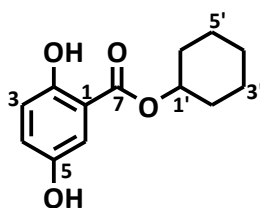

283

284 Pale yellow solid

285 **Yield:** 75 %

286 **Purity:** > 99.9 %

287 **<sup>1</sup>H NMR (300 MHz, CDCl<sub>3</sub>) δ<sub>H</sub> in ppm (multiplicity; *J* in Hz):** 10.51 (s, 2-OH), 7.32

288 (d, 3.0, H-6), 7.01 (dd, 9.0 and 3.0, H-4), 6.88 (d, 9.0, H-3), 5.10–5.02 (H-1'), 1.93–1.26

289 (H-2'–H-6')

290 **<sup>13</sup>C NMR (150 MHz, CDCl<sub>3</sub>) δ<sub>C</sub> in ppm:** 169.2 (C-7), 155.9 (C-2), 147.6 (C-5), 123.8

291 (C-4), 118.4 (C-3), 114.8 (C-6), 112.9 (C-1), 74.0 (C-1'), 31.5 (C-2' and C-6'), 25.3 (C-

292 3' and C-5'), 23.5 (C-4')

293

294 1.24 phenylethyl 2,5 dihydroxybenzoate (**24**)

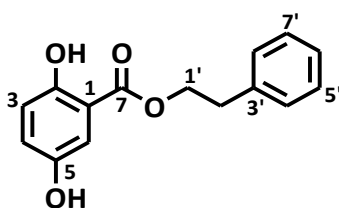

295

296 Pale yellow oil

297 **Yield:** 7 %

298 **Purity:** > 99.9 %

299 **<sup>1</sup>H NMR (400 MHz, CDCl<sub>3</sub>) δ<sub>H</sub> in ppm (multiplicity; *J* in Hz):** 10.33 (s, 2-OH),

300 7.38–7.28 (H-4'–H-8'), 7.26 (d, 3.2, H-6), 7.02 (dd, 8.8 and 3.2, H-4), 6.90 (d, 8.8, H-3),

301 4.69 (s, 5-OH), 4.55 (t, 6.8, H-1'), 3.12 (t, 6.8, H-2')

302  $^{13}\text{C}$  NMR (150 MHz,  $\text{CDCl}_3$ )  $\delta_{\text{C}}$  in ppm: 169.6 (C-7), 156.0 (C-2), 147.6 (C-5), 137.4  
303 (C-3'), 128.9 (C-5' and C-7'), 128.7 (C-4' and C-8'), 126.8 (C-6'), 124.1 (C-4), 118.5  
304 (C-3), 114.7 (C-6), 112.2 (C-1), 65.9 (C-1'), 35.0 (C-2')

305

306 1.25 ethyl 3,4 dihydroxybenzoate (**25**)

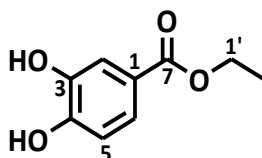

307

308 Pale yellow solid

309 **Yield:** 90 %

310 **Purity:** 99.1 %

311  $^1\text{H}$  NMR (400 MHz,  $\text{DMSO-}d_6$ )  $\delta_{\text{H}}$  in ppm (multiplicity;  $J$  in Hz): 7.35 (d, 2.4, H-2),

312 7.31 (dd, 8.4 and 2.4, H-6), 6.80 (d, 8.4, H-5), 4.31 (q, 7.2, H-1'), 1.27 (t, 7.2, H-2')

313  $^{13}\text{C}$  NMR (100 MHz,  $\text{DMSO-}d_6$ )  $\delta_{\text{C}}$  in ppm: 166.2 (C-7), 150.8 (C-4), 145.5 (C-3),

314 122.2 (C-6), 121.2 (C-1), 116.7 (C-5), 115.7 (C-2), 60.5 (C-1'), 14.7 (C-2')

315

316 1.26 butyl 3,4 dihydroxybenzoate (**26**)

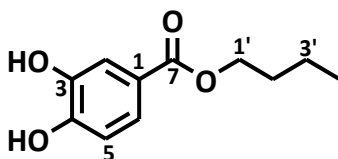

317

318 Pale yellow solid

319 **Yield:** 98 %

320 **Purity:** 99.1 %

321  $^1\text{H}$  NMR (400 MHz,  $\text{CDCl}_3$ )  $\delta_{\text{H}}$  in ppm (multiplicity;  $J$  in Hz): 7.67 (H-2), 7.58 (dd,

322 8.4 and 1.6, H-6), 6.93 (d, 8.4, H-5), 4.31 (t, 6.8, H-1'), 1.79–1.72 (H-2'), 1.53–1.44 (H-

323 3'), 0.99 (t, 5.4, H-4')

324  $^{13}\text{C}$  NMR (100 MHz,  $\text{CDCl}_3$ )  $\delta_{\text{C}}$  in ppm: 167.1 (C-7), 148.9 (C-4), 143.1 (C-3), 123.7  
325 (C-6), 122.7 (C-1), 116.6 (C-5), 114.8 (C-2), 65.0 (C-1'), 30.7 (C-2'), 19.3 (C-3'), 13.8  
326 (C-4')

327

328 1.27 hexyl 3,4 dihydroxybenzoate (**27**)

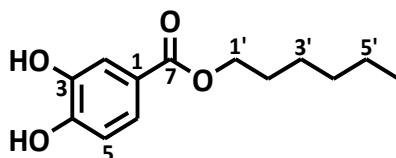

329

330 Pale yellow crystal

331 **Yield:** 87 %

332 **Purity:** 99.1 %

333  $^1\text{H}$  NMR (400 MHz,  $\text{DMSO-}d_6$ )  $\delta_{\text{H}}$  in ppm (multiplicity;  $J$  in Hz): 7.35 (d, 2.4, H-2),

334 7.31 (dd, 2.4 and 8.0, H-5), 6.81 (d, 8.0, H-6), 4.18 (t, 6.4, H-1'), 1.70–1.63 (H-2'), 1.39–

335 1.30 (H-3'–H-5'), 0.87 (t, 7.2, H-6')

336  $^{13}\text{C}$  NMR (100 MHz,  $\text{DMSO-}d_6$ )  $\delta_{\text{C}}$  in ppm: 166.2 (C-7), 150.9 (C-4), 145.5 (C-3),

337 122.2 (C-6), 121.1 (C-1), 116.6 (C-5), 115.7 (C-2), 64.4 (C-1'), 31.4, 28.7, 25.6, and 22.5

338 (C-2'–C-5'), 14.4 (C-6')

339

340 1.28 heptyl 3,4 dihydroxybenzoate (**28**)

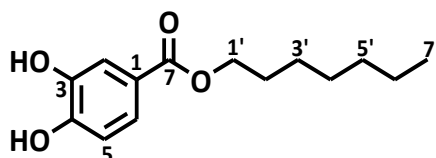

341

342 White crystal

343 **Yield:** 96 %

344 **Purity:** 98.5 %



345 **<sup>1</sup>H NMR (600 MHz, DMSO-*d*<sub>6</sub>) δ<sub>H</sub> in ppm (multiplicity; *J* in Hz):** 9.80 (s, 4-OH), 9.39  
346 (s, 3-OH), 7.35 (d, 1.8, H-2), 7.31 (dd, 8.4 and 1.8, H-6), 6.81 (d, 8.4, H-5), 4.17 (t, 6.5,  
347 H-1'), 1.68–1.63, (H-2'), 1.38–1.26 (H-3'–H-6'), 0.86 (t, 6.9, H-7')

348 **<sup>13</sup>C NMR (150 MHz, DMSO-*d*<sub>6</sub>) δ<sub>C</sub> in ppm:** 166.2 (C-7), 150.8 (C-4), 145.5 (C-3),  
349 122.2 (C-6), 121.2 (C-1), 116.6 (C-5), 115.8 (C-2), 64.5 (C-1'), 31.7, 28.8, 28.7, 26.0,  
350 and 22.5 (C-2'–C-6'), 14.4 (C-7')

351

352 1.29 octyl 3,4 dihydroxybenzoate (**29**)

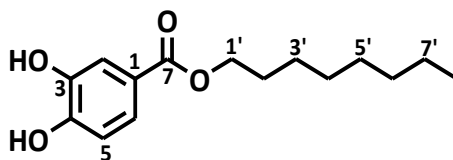

353

354 White crystal

355 **Yield:** 76 %

356 **Purity:** 98.5 %

357 **<sup>1</sup>H NMR (400 MHz, CDCl<sub>3</sub>) δ<sub>H</sub> in ppm (multiplicity; *J* in Hz):** 7.70 (d, 2.0, H-2), 7.58  
358 (dd, 8.4 and 2.0, H-6), 6.93 (d, 8.4, H-5), 4.30 (t, 6.8, H-1'), 1.80–1.73 (H-2'), 1.48–1.30  
359 (H-3'–H-7'), 0.90 (t, 6.8, H-8')

360 **<sup>13</sup>C NMR (100 MHz, CDCl<sub>3</sub>) δ<sub>C</sub> in ppm:** 167.3 (C-7), 148.9 (C-4), 143.2 (C-3), 123.7  
361 (C-6), 122.6 (C-1), 116.7 (C-5), 114.8 (C-2), 65.4 (C-1'), 31.8, 29.2, 29.1, 28.7, 26.0, and  
362 22.6 (C-2'–C-7'), 14.1 (C-8')

363

364 1.30 nonyl 3,4 dihydroxybenzoate (**30**)

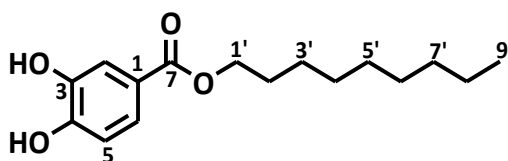

365

366 White solid

367 **Yield:** 98 %

368 **Purity:** 97.9 %

369 **<sup>1</sup>H NMR (300 MHz, CDCl<sub>3</sub>) δ<sub>H</sub> in ppm (multiplicity; *J* in Hz):** 7.67 (d, 2.1, H-2), 7.58  
370 (dd, 8.4 and 2.1, H-6), 6.92 (d, 8.4, H-5), 6.42 (s, 4-OH), 6.15 (s, 3-OH), 4.29 (t, 6.7, H-  
371 1'), 1.78–1.71 (H-2'), 1.44–1.28 (H-3'–H-8'), 0.89 (t, 6.7, H-9')

372 **<sup>13</sup>C NMR (150 MHz, DMSO-*d*<sub>6</sub>) δ<sub>C</sub> in ppm:** 166.2 (C-7), 150.8 (C-4), 145.5 (C-3),  
373 122.2 (C-6), 121.2 (C-1), 116.6 (C-5), 115.7 (C-2), 64.5 (C-1'), 31.7, 29.4, 29.2, 29.1,  
374 28.7, 26.0, and 22.6 (C-2'–C-8'), 14.1 (C-9')

375

376 1.31 decyl 3,4 dihydroxybenzoate (**31**)

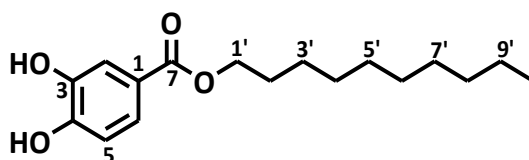

377

378 White solid

379 **Yield:** 95 %

380 **Purity:** 91.3 %

381 **<sup>1</sup>H NMR (400 MHz, CDCl<sub>3</sub>) δ<sub>H</sub> in ppm (multiplicity; *J* in Hz):** 7.68–7.67 (H-2), 7.59  
382 (dd, 8.4 and 1.6, H-6), 6.93 (d, 8.4, H-5), 4.30 (t, 6.8, H-1'), 1.80–1.73 (H-2'), 1.48–1.29  
383 (H-3'–H-9'), 0.90 (t, 6.8, H-10')

384 **<sup>13</sup>C NMR (100 MHz, CDCl<sub>3</sub>) δ<sub>C</sub> in ppm:** 166.9 (C-7), 148.8 (C-4), 143.1 (C-3), 123.7  
385 (C-6), 121.5 (C-1), 116.6 (C-5), 114.8 (C-2), 65.3 (C-1'), 31.9, 29.5, 29.3, 28.7, 26.0, and  
386 22.7 (C-2'–C-9'), 14.1 (C-10')

387

388 1.32 dodecyl 3,4 dihydroxybenzoate (**32**)

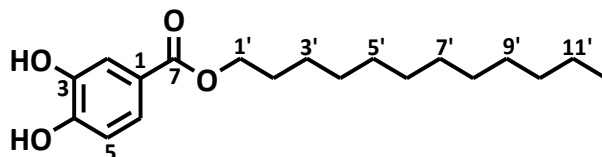

389

390 White solid

391 **Yield:** 82 %

392 **Purity:** > 99.9 %

393 **<sup>1</sup>H NMR (300 MHz, CDCl<sub>3</sub>) δ<sub>H</sub> in ppm (multiplicity; *J* in Hz):** 9.78 (s, 4-OH), 9.36 (s,  
394 3-OH), 7.34 (d, 2.1, H-2), 7.29 (dd, 8.1 and 2.1, H-6), 6.79 (d, 8.1, H-5), 4.16 (t, 6.3, H-  
395 1'), 1.67–1.60 (H-2'), 1.38–1.23 (H-3'–H-11'), 0.84 (t, 6.3, H-12')

396 **<sup>13</sup>C NMR (100 MHz, CDCl<sub>3</sub>) δ<sub>C</sub> in ppm:** 166.5 (C-7), 152.9 (C-4), 148.6 (C-3), 123.5  
397 (C-6), 123.2 (C-1), 112.0 (C-5), 110.2 (C-2), 65.0 (C-1'), 31.9, 29.7, 29.6, 29.5, 29.3,  
398 29.2, 28.8, 26.1, and 22.7 (C-2'–C-11'), 14.1 (C-12')

399

400 1.33 isopropyl 3,4 dihydroxybenzoate (**33**)

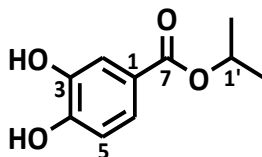

401

402 White solid

403 **Yield:** 56 %

404 **Purity:** > 99.9 %

405 **<sup>1</sup>H NMR (300 MHz, DMSO-*d*<sub>6</sub>) δ<sub>H</sub> in ppm (multiplicity; *J* in Hz):** 9.75 (s, 4-OH), 9.34  
406 (s, 3-OH), 7.34 (d, 2.1, H-2), 7.28 (dd, 8.4 and 2.1, H-6), 6.79 (d, 8.4, H-5), 5.04 (h, 6.3,  
407 H-1'), 1.26 (d, 6.3, H-2')

408 **<sup>13</sup>C NMR (150 MHz, DMSO-*d*<sub>6</sub>) δ<sub>C</sub> in ppm:** 165.6 (C-7), 150.7 (C-4), 145.5 (C-3),  
409 122.1 (C-6), 121.6 (C-1), 116.6 (C-5), 115.7 (C-2), 67.7 (C-1') 22.2 (C-2')

410

411 1.34 cyclopentyl 3,4 dihydroxybenzoate (**34**)

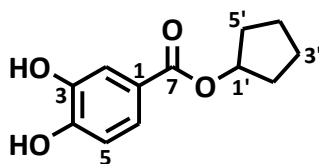

412

413 White solid

414 **Yield:** 68 %

415 **Purity:** > 99.9 %

416 **<sup>1</sup>H NMR (300 MHz, DMSO-*d*<sub>6</sub>) δ<sub>H</sub> in ppm (multiplicity; *J* in Hz):** 9.75 (s, 4-OH), 9.34

417 (s, 3-OH), 7.32 (d, 2.1, H-2), 7.27 (dd, 8.1 and 2.1, H-6), 6.78 (d, 8.1, H-5), 5.23–5.20

418 (H-1'), 1.89–1.59 (H-2'–H-5')

419 **<sup>13</sup>C NMR (150 MHz, DMSO-*d*<sub>6</sub>) δ<sub>C</sub> in ppm:** 165.9 (C-7), 150.7 (C-4), 145.4 (C-3),

420 122.1 (C-6), 121.6 (C-1), 116.6 (C-5), 115.7 (C-2), 76.9 (C-1'), 32.8 (C-2' and C-5'),

421 23.8 (C-3' and C-4')

422

423 1.35 cyclohexyl 3,4 dihydroxybenzoate (**35**)

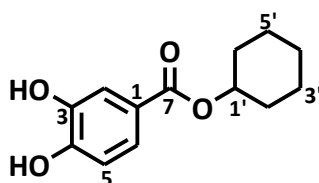

424

425 White crystal

426 **Yield:** 74 %

427 **Purity:** > 99.9 %

428 **<sup>1</sup>H NMR (600 MHz, DMSO-*d*<sub>6</sub>) δ<sub>H</sub> in ppm (multiplicity; *J* in Hz):** 7.36 (d, 1.8, H-2),

429 7.31 (dd, 8.4 and 1.8, H-6), 6.80 (d, 8.4, H-5), 4.86–4.82 (H-1'), 1.52–1.30 (H-2'–H-6')

430  $^{13}\text{C}$  NMR (150 MHz, DMSO- $d_6$ )  $\delta_{\text{C}}$  in ppm: 165.5 (C-7), 150.7 (C-4), 145.5 (C-3),  
431 122.2 (C-6), 121.6 (C-1), 116.7 (C-5), 115.7 (C-2), 72.1 (C-1'), 31.6 (C-2' and C-6'),  
432 25.4 (C-4'), 23.5 (C-3' and C-5')

433

434 1.36 phenylethyl 3,4 dihydroxybenzoate (**36**)

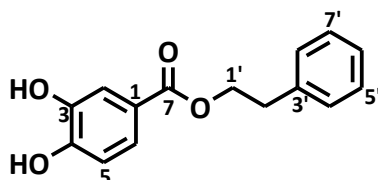

435

436 White crystal

437 **Yield:** 21 %

438 **Purity:** > 99.9 %

439  $^1\text{H}$  NMR (300 MHz, DMSO- $d_6$ )  $\delta_{\text{H}}$  in ppm (multiplicity;  $J$  in Hz): 7.32–7.18 (H-2, H-  
440 6 and H-4'–H-8'), 6.78 (d, 8.4, H-5), 4.37 (t, 6.6, H-1'), 2.98 (t, 6.6 Hz, H-2')

441  $^{13}\text{C}$  NMR (150 MHz, DMSO- $d_6$ )  $\delta_{\text{C}}$  in ppm: 166.1 (C-7), 150.9 (C-4), 145.5 (C-3),  
442 138.7 (C-3'), 129.4 (C-5' and C-7'), 128.8 (C-4' and C-8'), 126.8 (C-6'), 122.2 (C-6),  
443 121.0 (C-1), 116.7 (C-5), 115.7 (C-2), 65.2 (C-1'), 35.0 (C-2').

444

445

446

447

448

449

450

451

452

453 **Figure S1. I)**  $^1\text{H}$  NMR spectrum of compound **1** (400 MHz –  $\text{CDCl}_3$ )

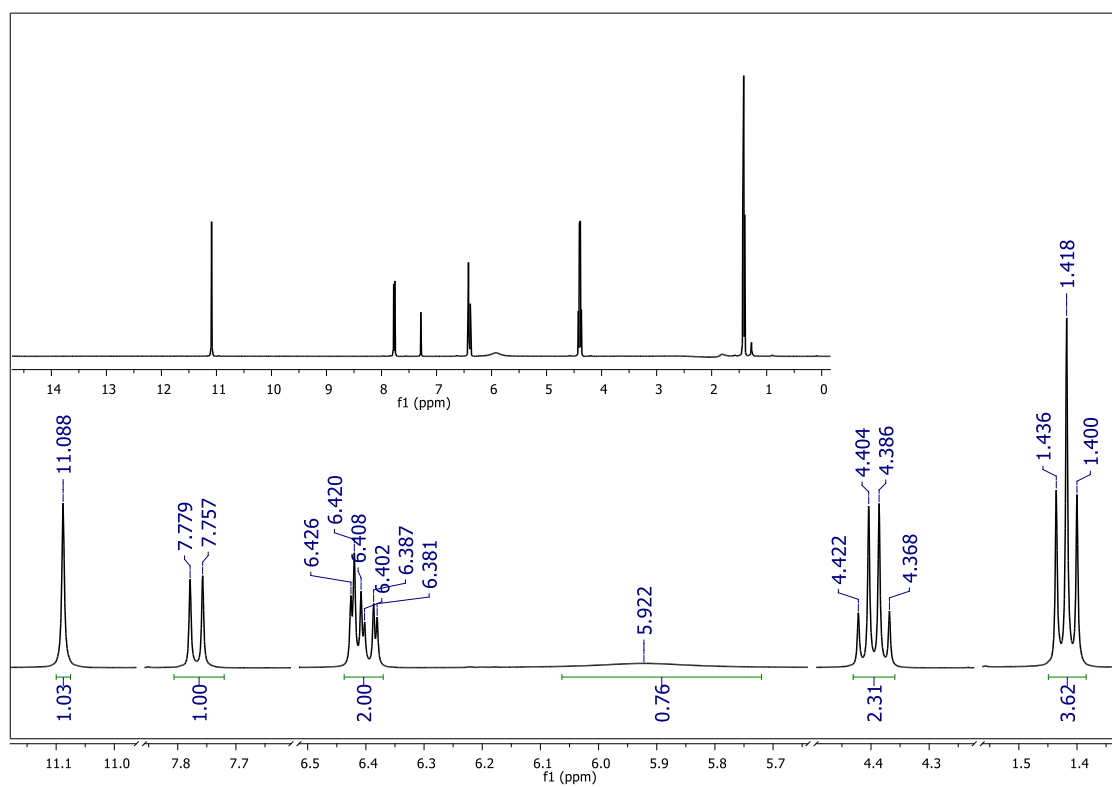

454

455

456 **Figure S1. II)**  $^{13}\text{C}$  NMR spectrum of compound **1** (100 MHz –  $\text{CDCl}_3$ )

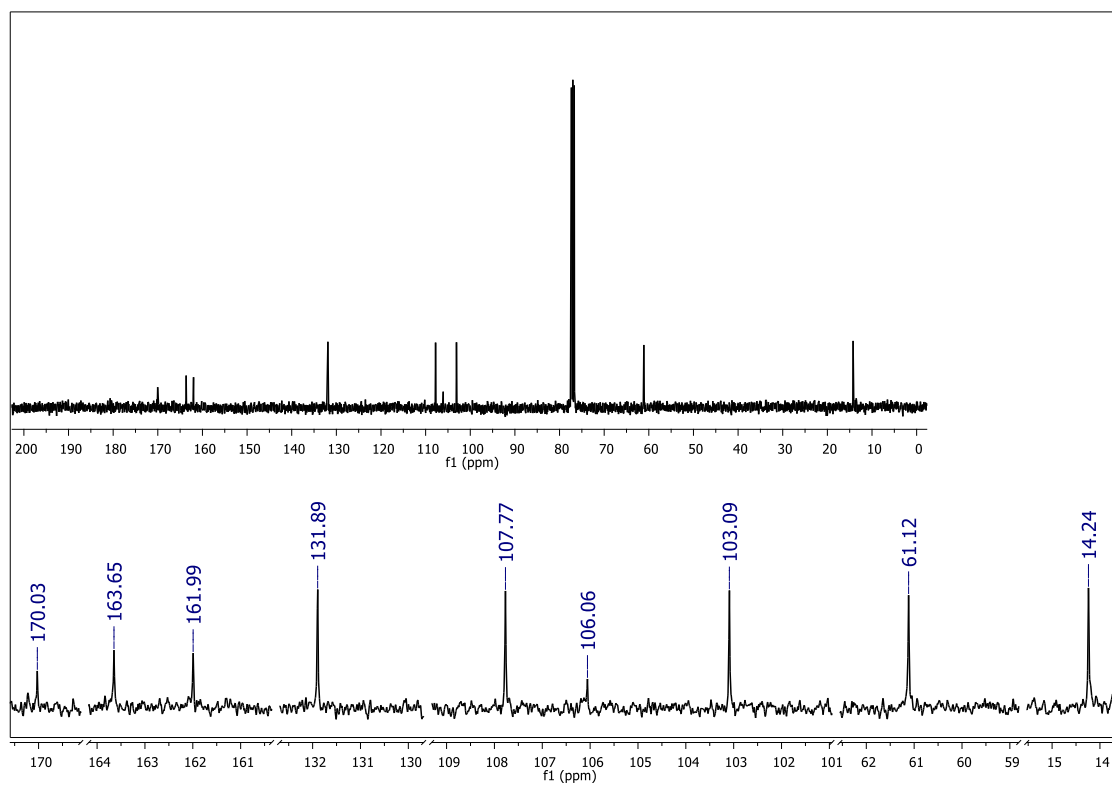

457

458

459 **Figure S1. III) HPLC chromatogram of compound 1**

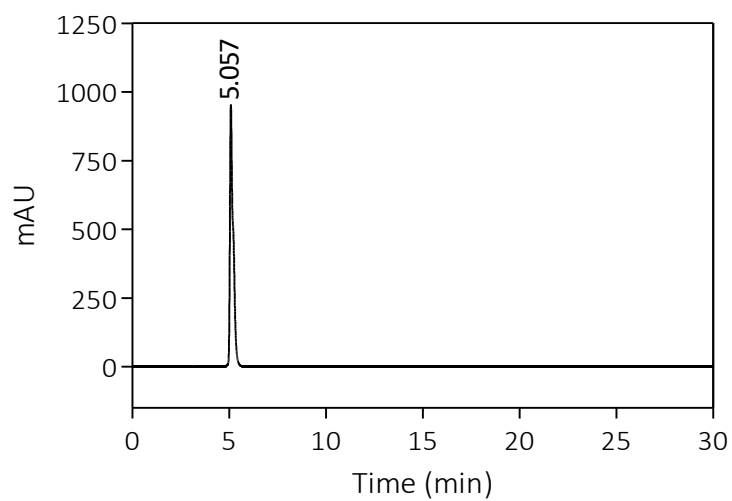

460

461

462

463

464

465

466

467

468

469

470

471

472

473

474

475

476

477

478 **Figure S2. I)**  $^1\text{H}$  NMR spectrum of compound **2** (400 MHz –  $\text{CDCl}_3$ )

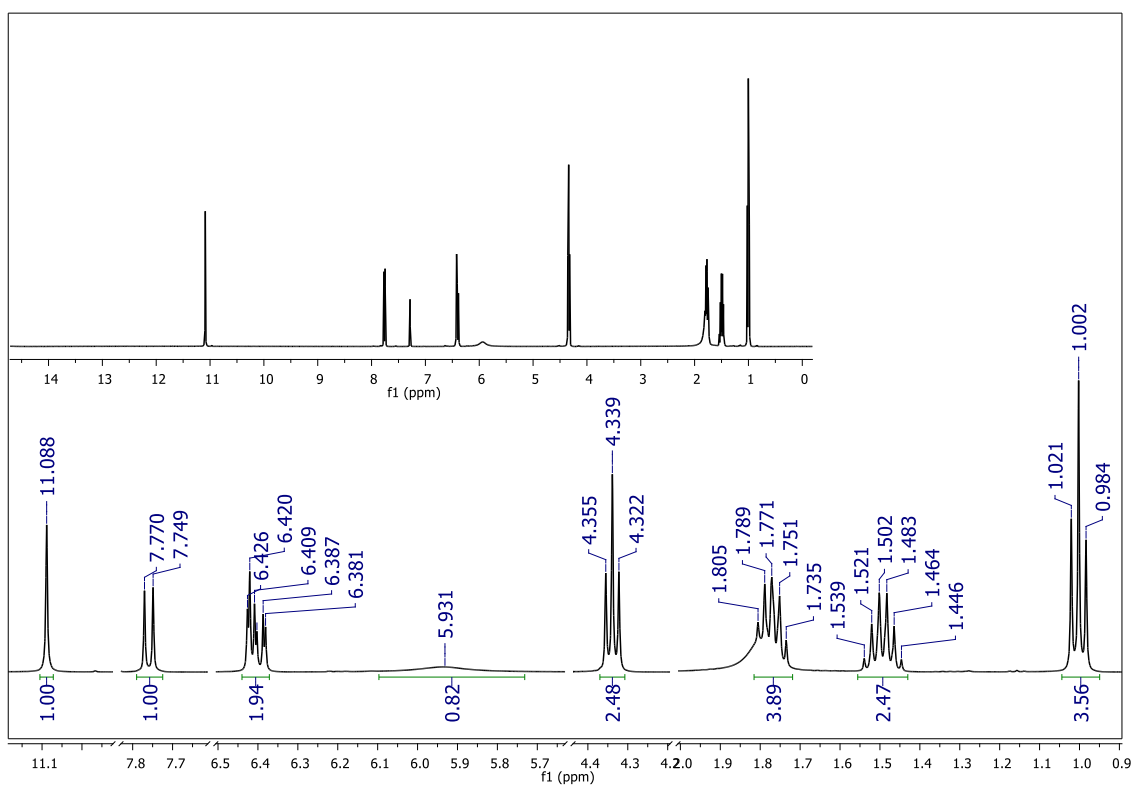

481 **Figure S2. II)**  $^{13}\text{C}$  NMR spectrum of compound **2** (100 MHz –  $\text{CDCl}_3$ )

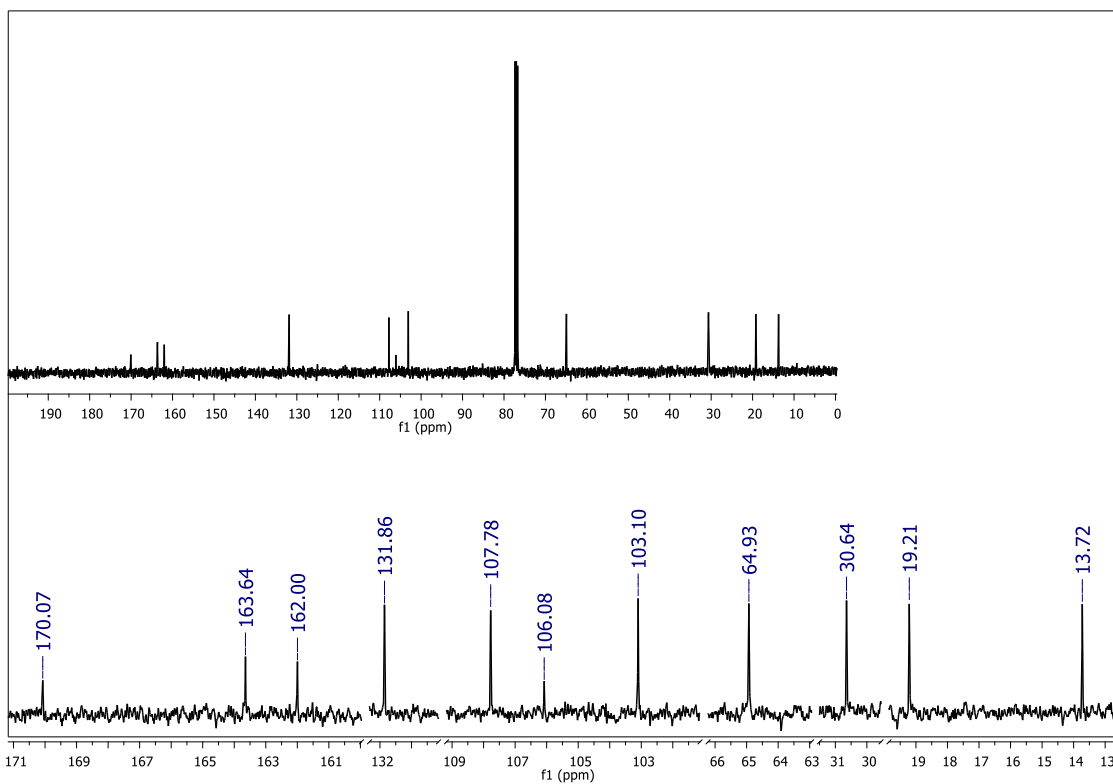



484 **Figure S2. III)** HPLC chromatogram of compound **2**

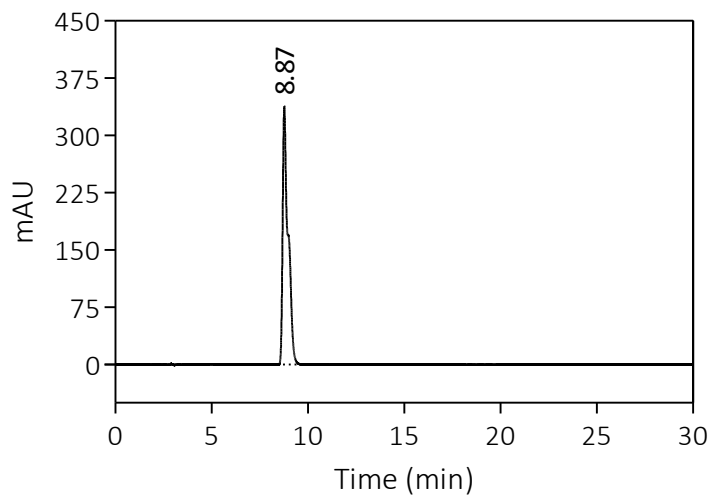

485

486

487

488

489

490

491

492

493

494

495

496

497

498

499

500

501

502

503 **Figure S3. I)**  $^1\text{H}$  NMR spectrum of compound **3** (400 MHz –  $\text{CDCl}_3$ )

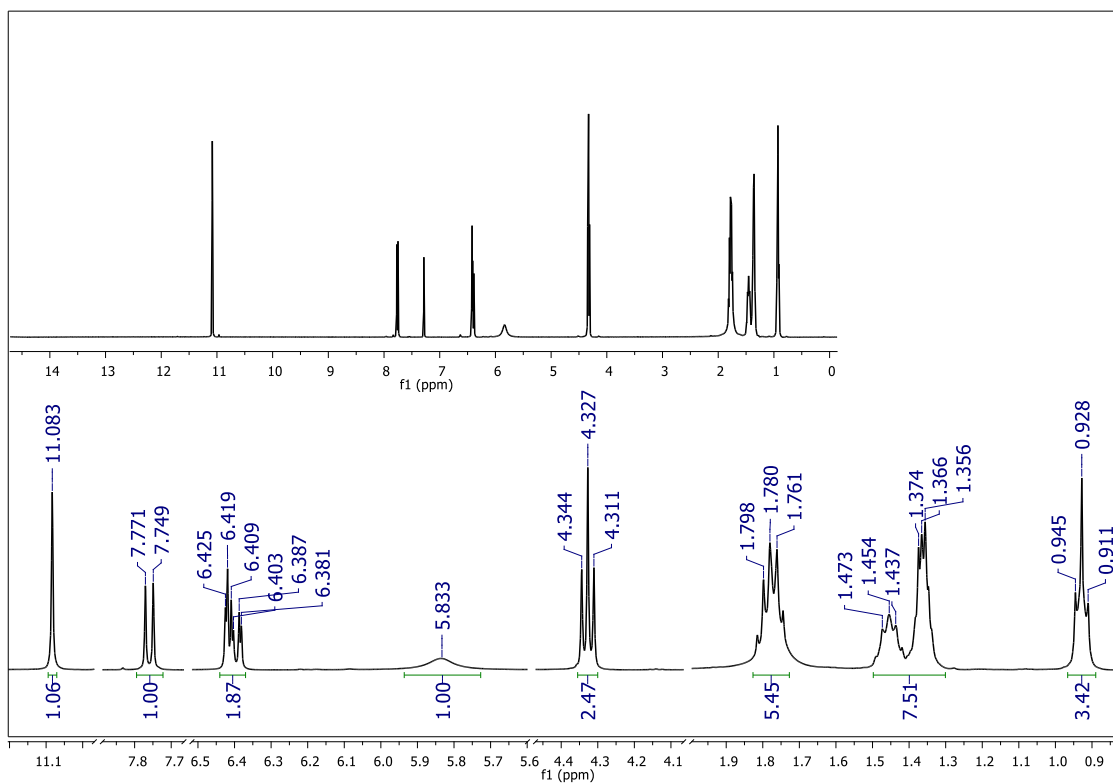

504

505

506 **Figure S3. II)**  $^{13}\text{C}$  NMR spectrum of compound **3** (100 MHz –  $\text{CDCl}_3$ )

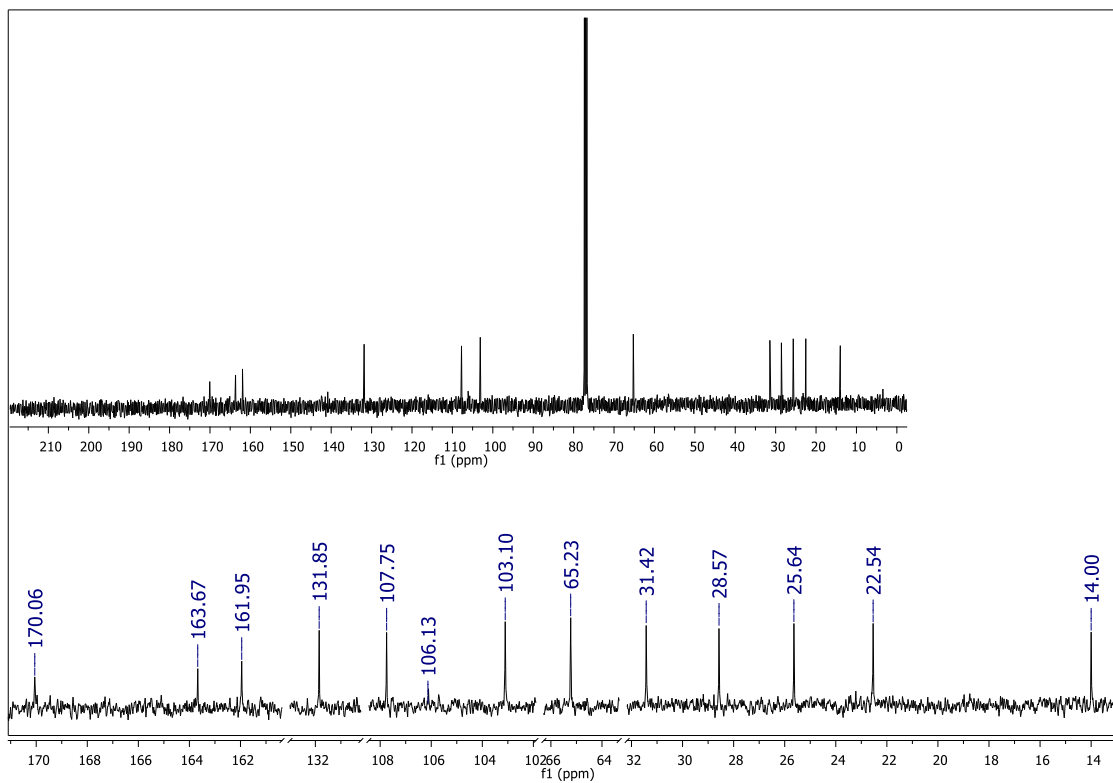

507

508

509 **Figure S3.** III) HPLC chromatogram of compound **3**

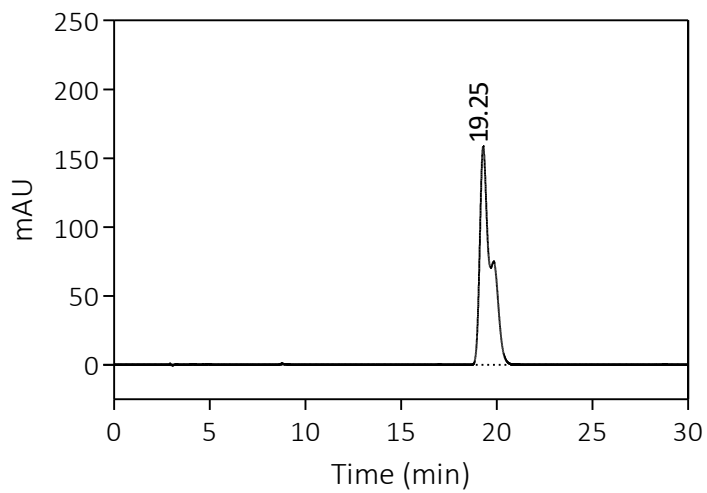

510

511

512

513

514

515

516

517

518

519

520

521

522

523

524

525

526

527

528 **Figure S4. I)**  $^1\text{H}$  NMR spectrum of compound **4** (600 MHz –  $\text{CDCl}_3$ )

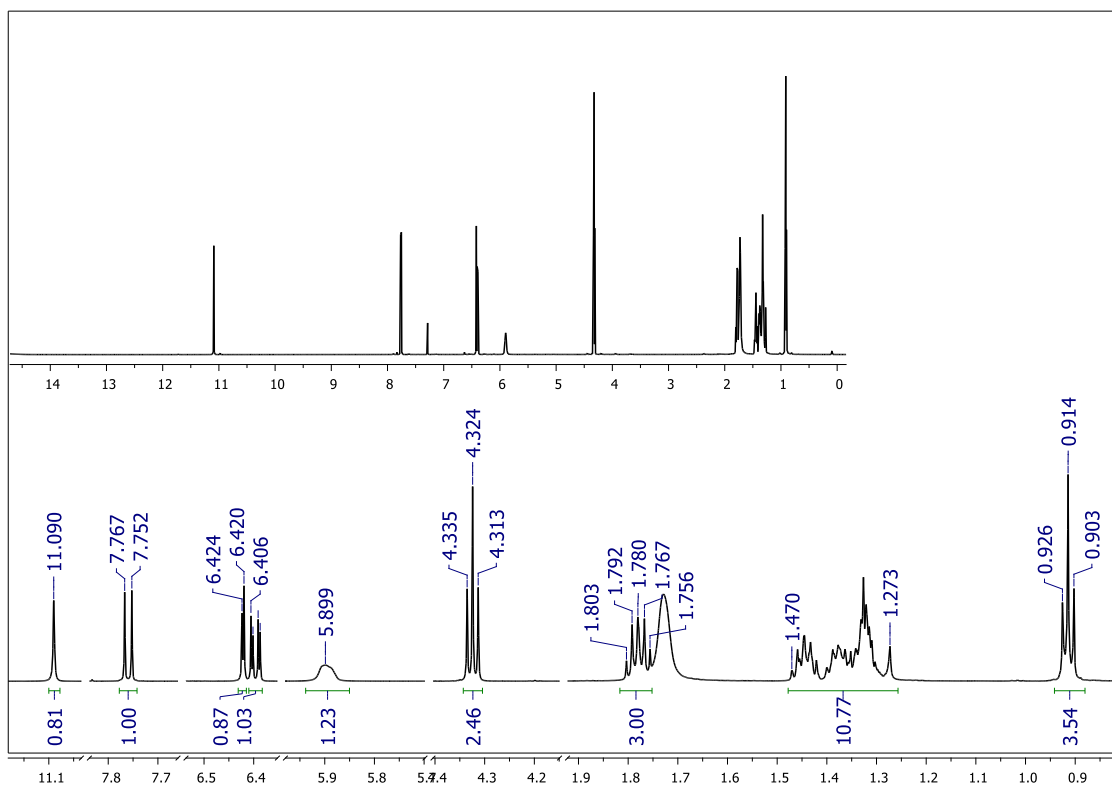

529

530

531 **Figure S4. II)**  $^{13}\text{C}$  NMR spectrum of compound **4** (150 MHz –  $\text{CDCl}_3$ )

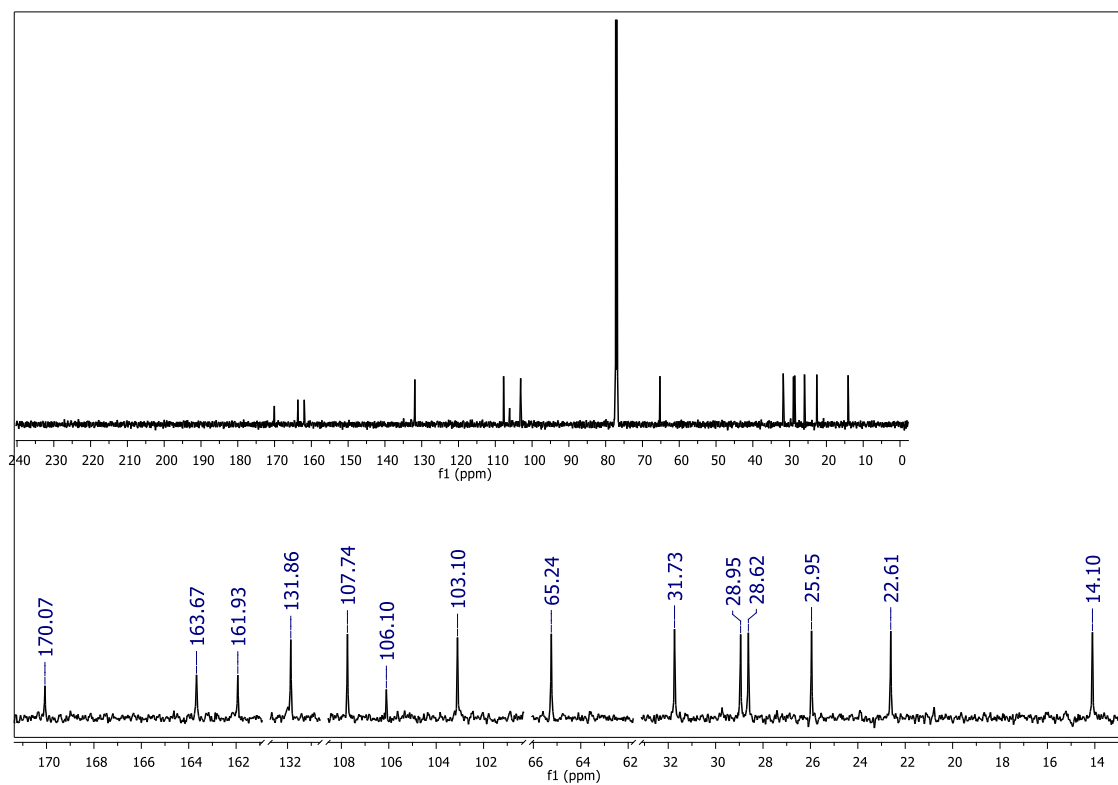

532

533

534 **Figure S4.** III) HPLC chromatogram of compound **4**

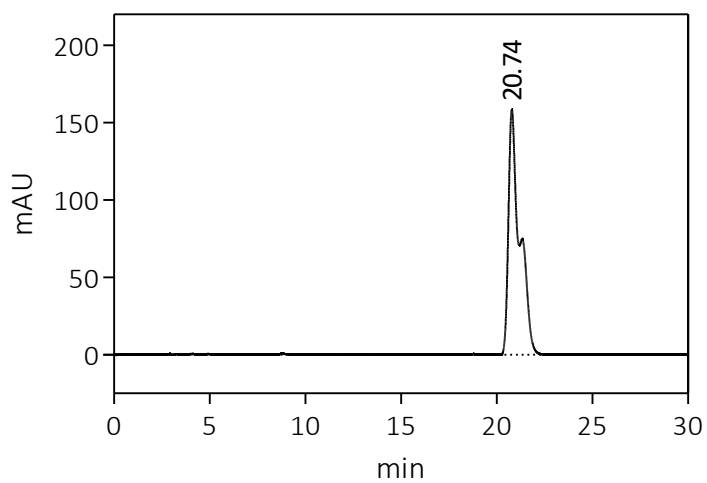

535

536

537

538

539

540

541

542

543

544

545

546

547

548

549

550

551

552

553 **Figure S5. I)**  $^1\text{H}$  NMR spectrum of compound **5** (400 MHz –  $\text{CDCl}_3$ )

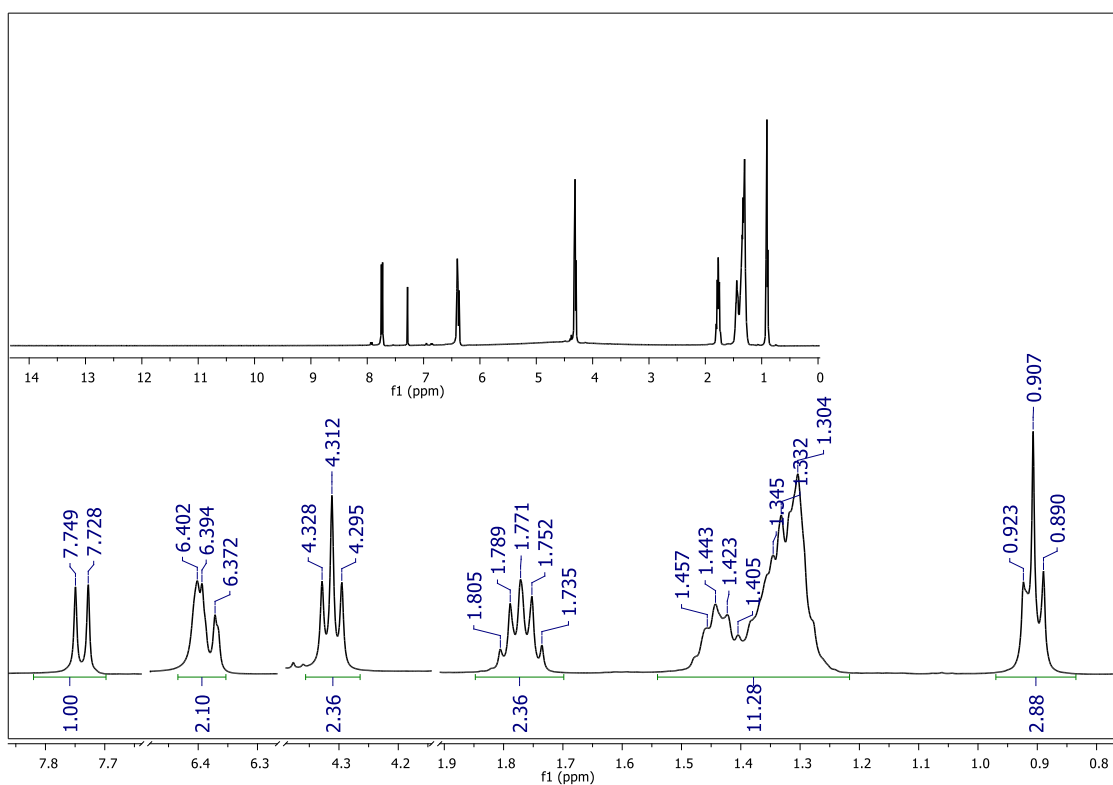

554

555

556 **Figure S5. II)**  $^{13}\text{C}$  NMR spectrum of compound **5** (100 MHz –  $\text{CDCl}_3$ )

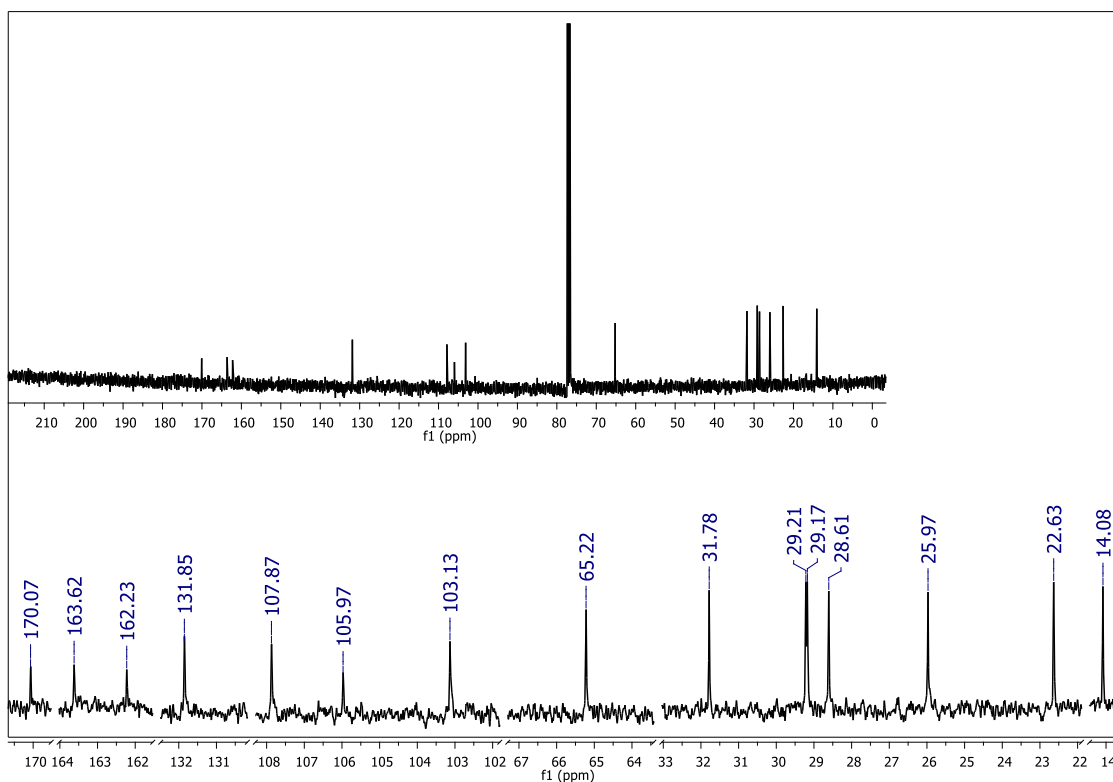

557

558

559 **Figure S5. III)** HPLC chromatogram of compound **5**

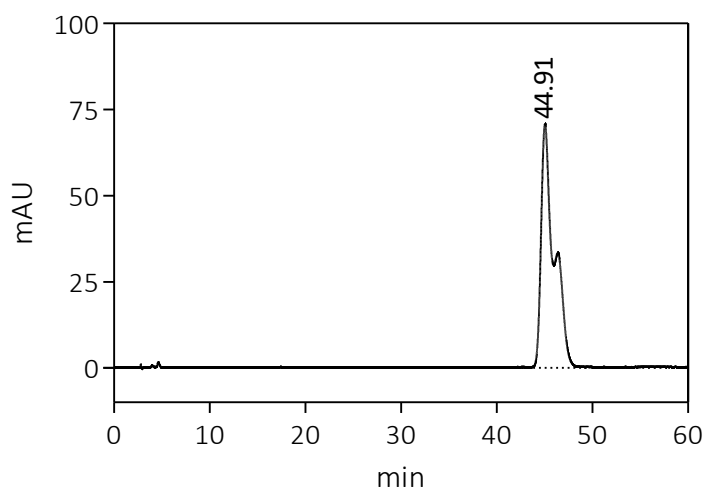

560

561

562

563

564

565

566

567

568

569

570

571

572

573

574

575

576

577

578 **Figure S6. I)**  $^1\text{H}$  NMR spectrum of compound **6** (400 MHz –  $\text{CDCl}_3$ )

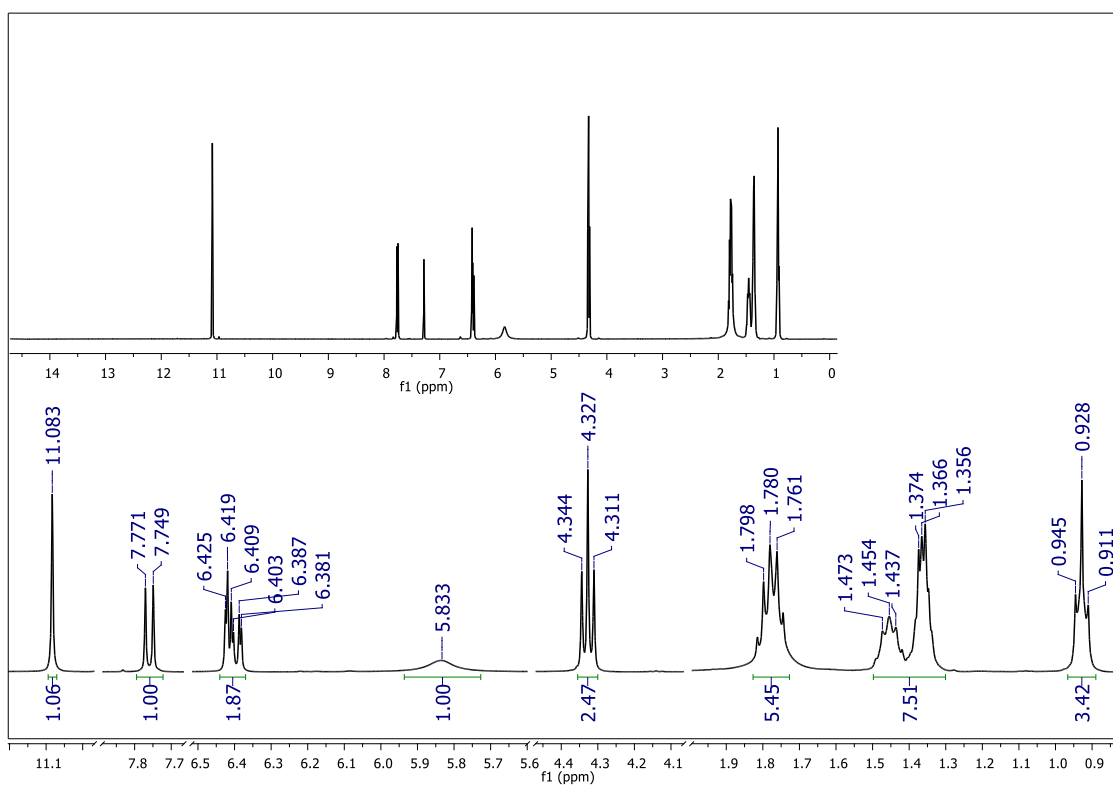

579

580

581 **Figure S6. II)**  $^{13}\text{C}$  NMR spectrum of compound **6** (100 MHz –  $\text{CDCl}_3$ )

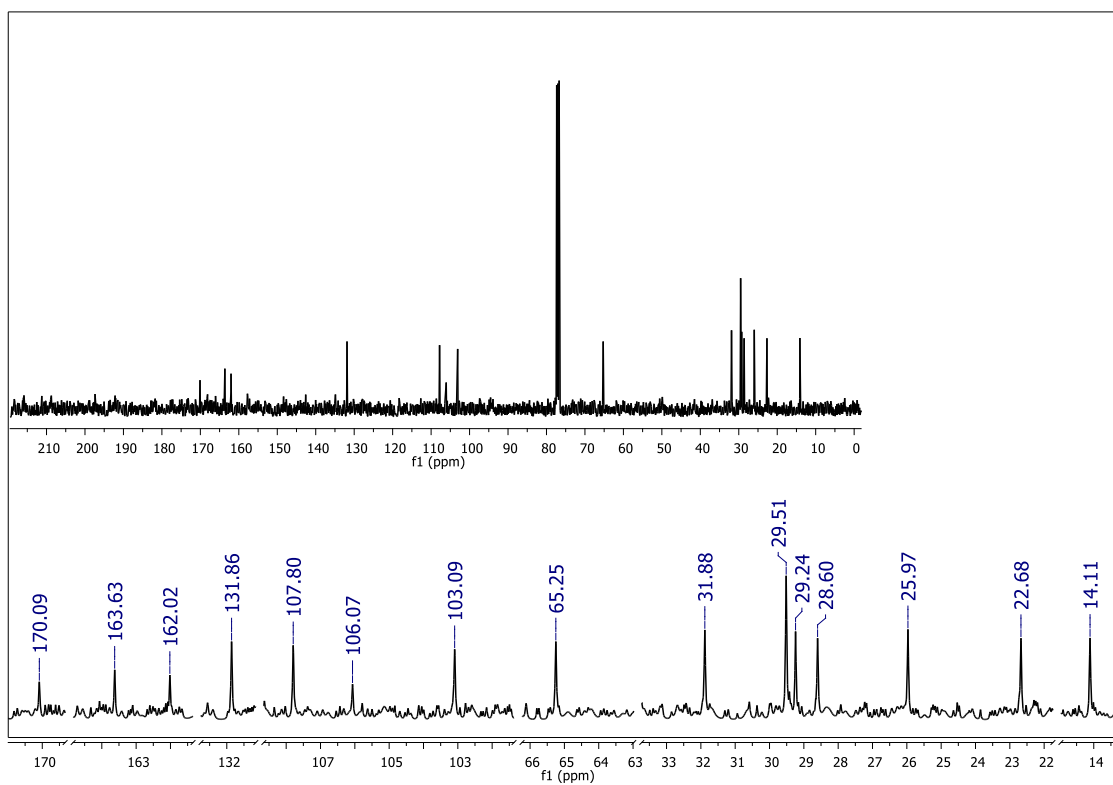

582

583



584 **Figure S6. III)** HPLC chromatogram of compound **6**

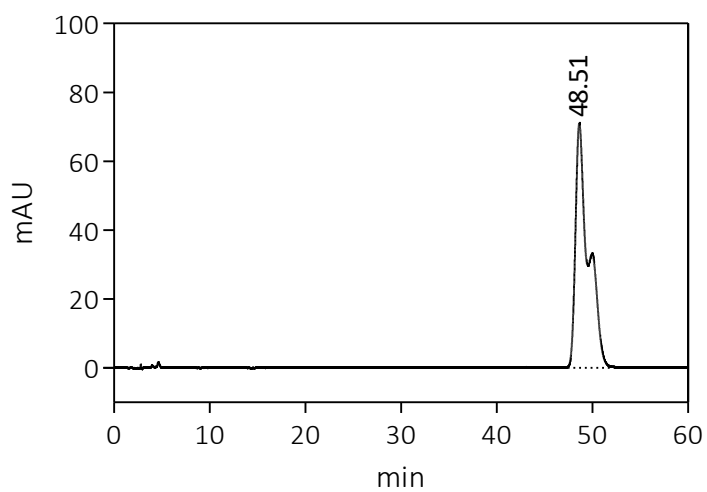

585

586

587

588

589

590

591

592

593

594

595

596

597

598

599

600

601

602

603 **Figure S7. I)**  $^1\text{H}$  NMR spectrum of compound **7** (400 MHz –  $\text{CDCl}_3$ )

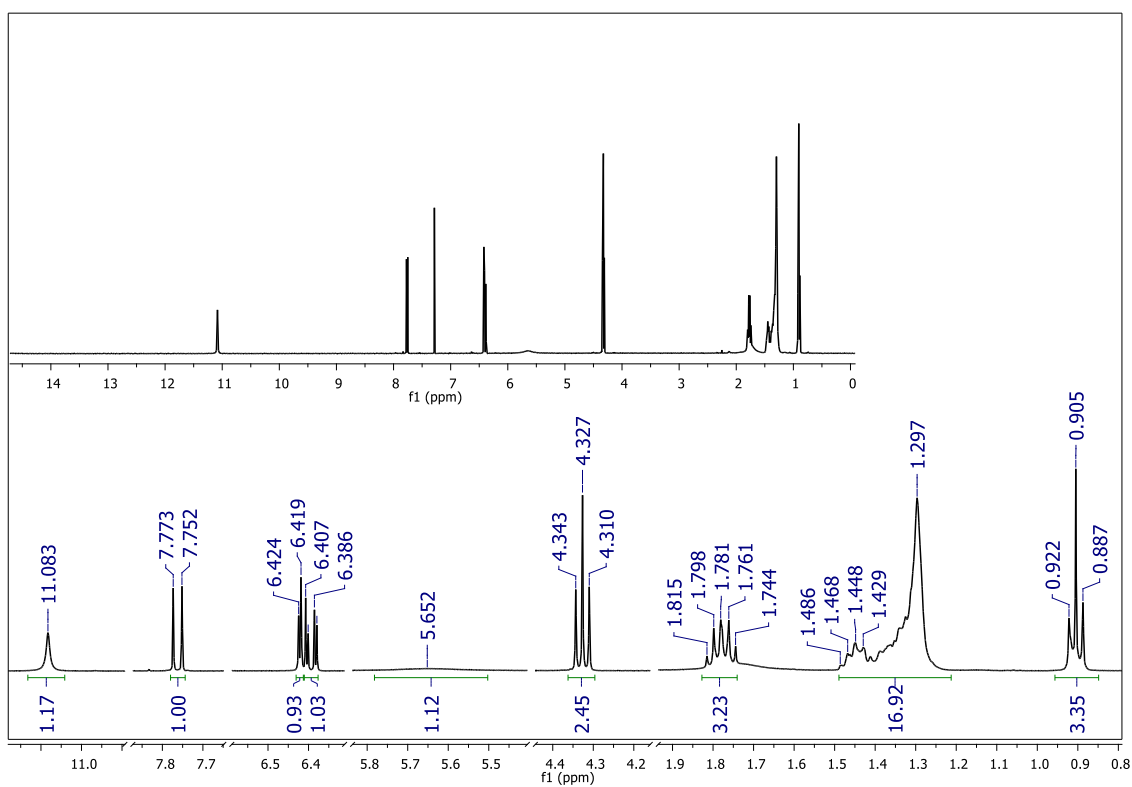

606 **Figure S7. II)**  $^{13}\text{C}$  NMR spectrum of compound **7** (100 MHz –  $\text{CDCl}_3$ )

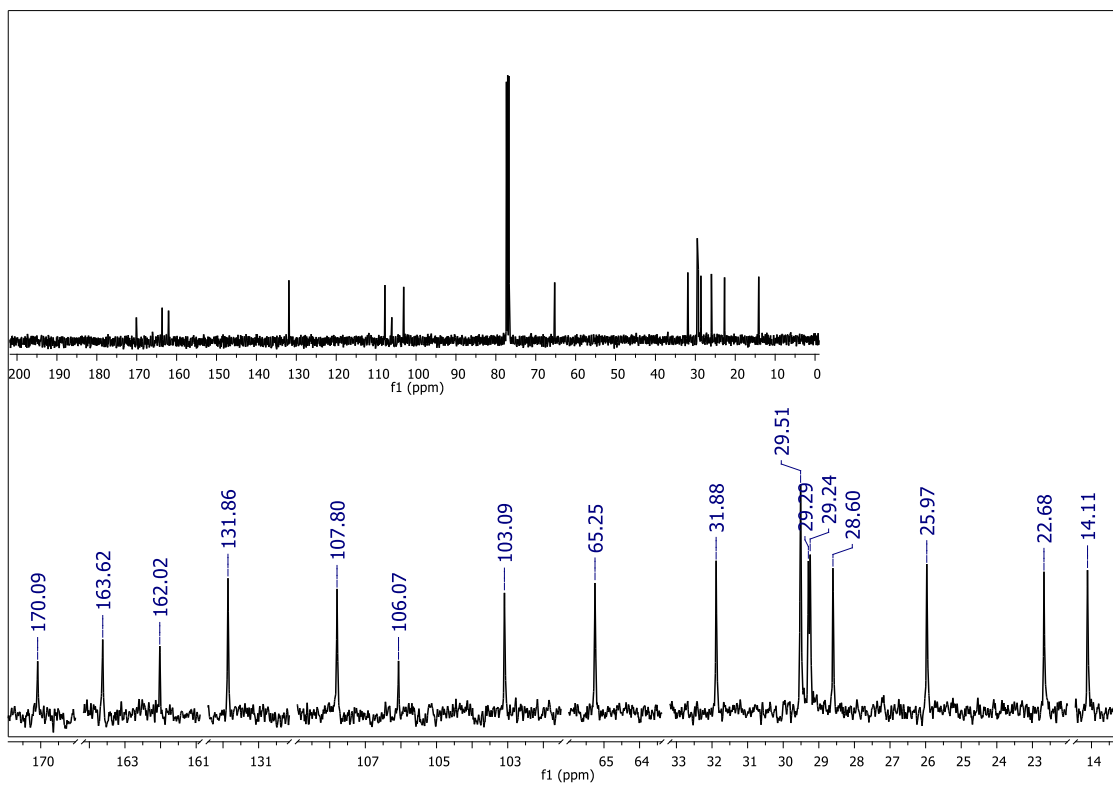

609 **Figure S7. III)** HPLC chromatogram of compound **7**

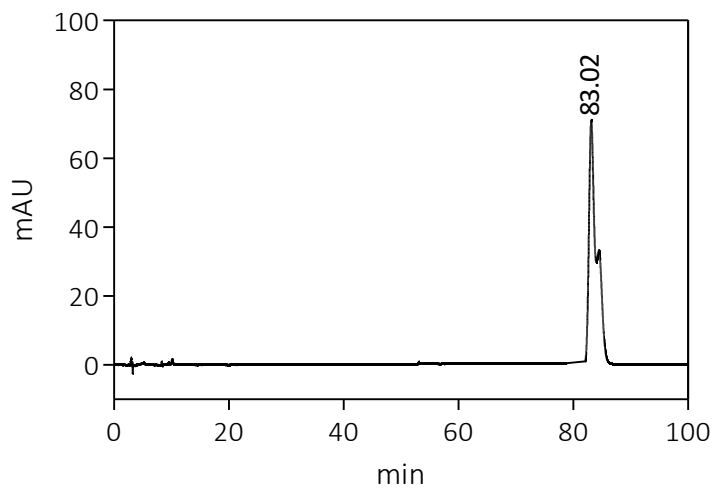

610

611

612

613

614

615

616

617

618

619

620

621

622

623

624

625

626

627

628 **Figure S8. I)**  $^1\text{H}$  NMR spectrum of compound **8** (300 MHz –  $\text{CDCl}_3$ )

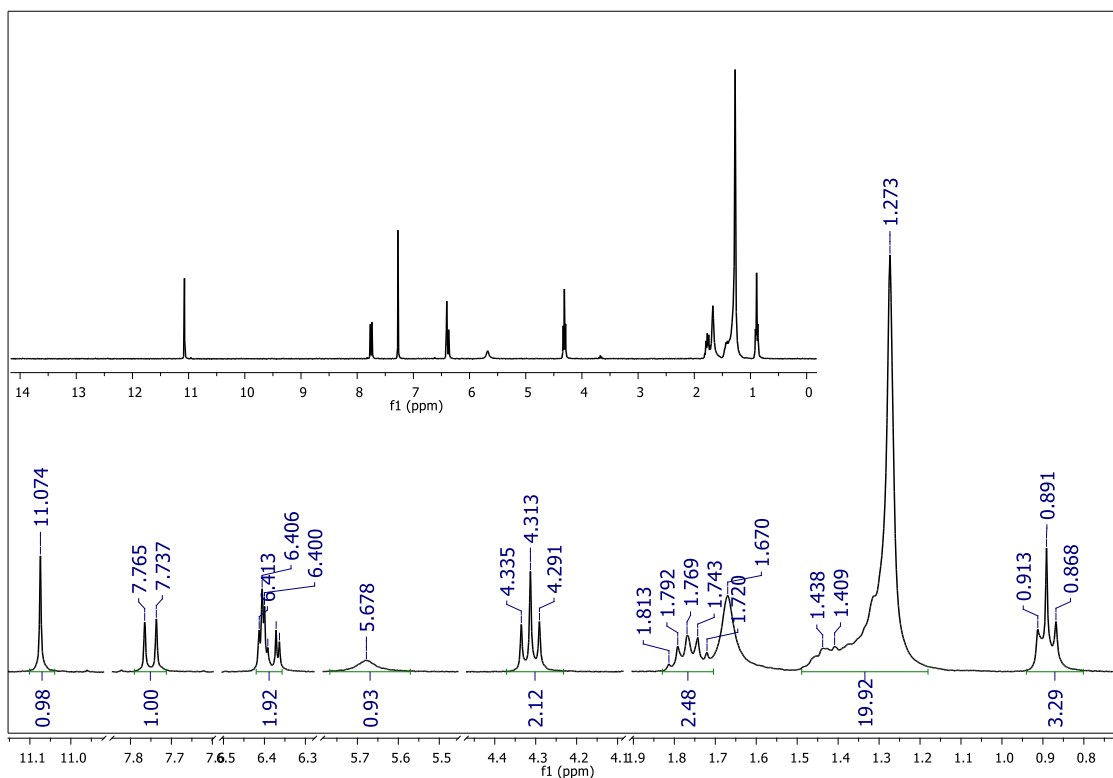

631 **Figure S8. II)**  $^{13}\text{C}$  NMR spectrum of compound **8** (100 MHz –  $\text{CDCl}_3$ )

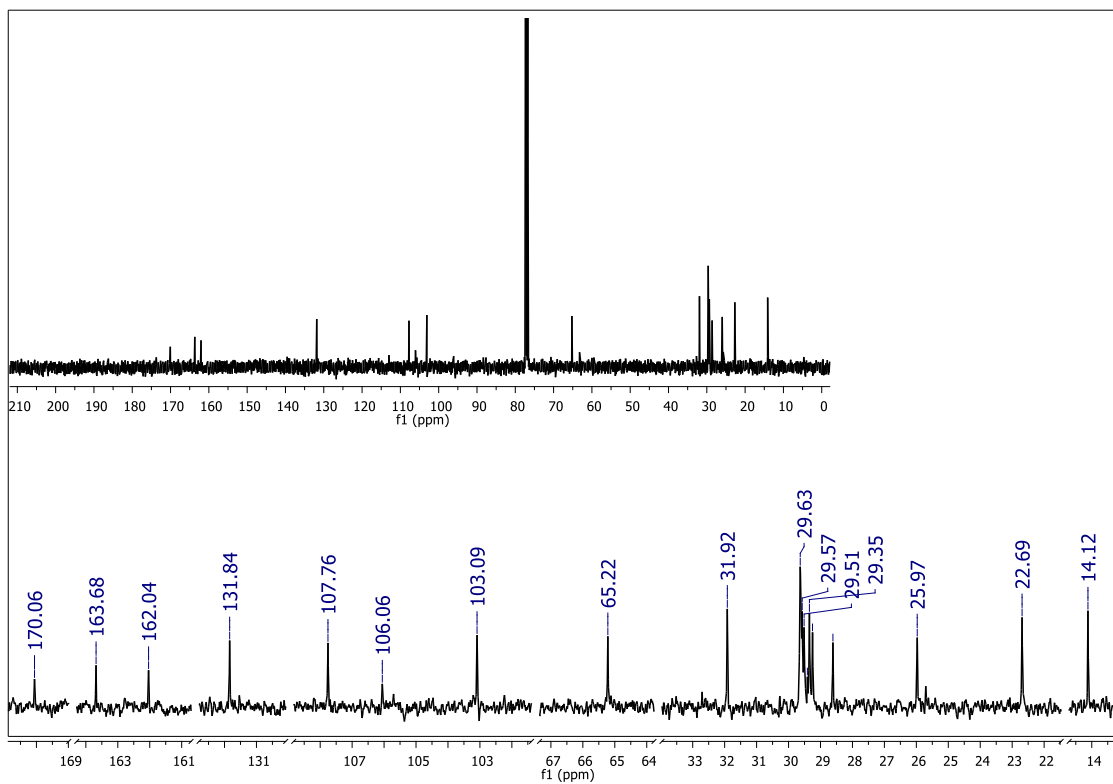

634 **Figure S8.** III) HPLC chromatogram of compound **8**

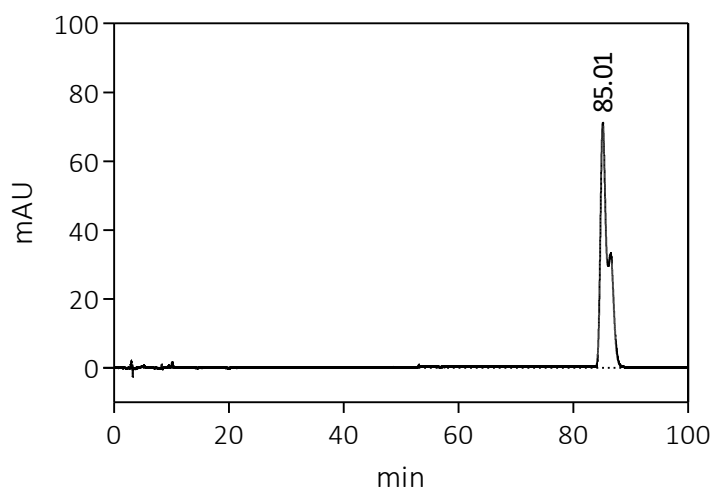

635

636

637

638

639

640

641

642

643

644

645

646

647

648

649

650

651

652

653 **Figure S9. I)**  $^1\text{H}$  NMR spectrum of compound **9** (600 MHz –  $\text{CDCl}_3$ )

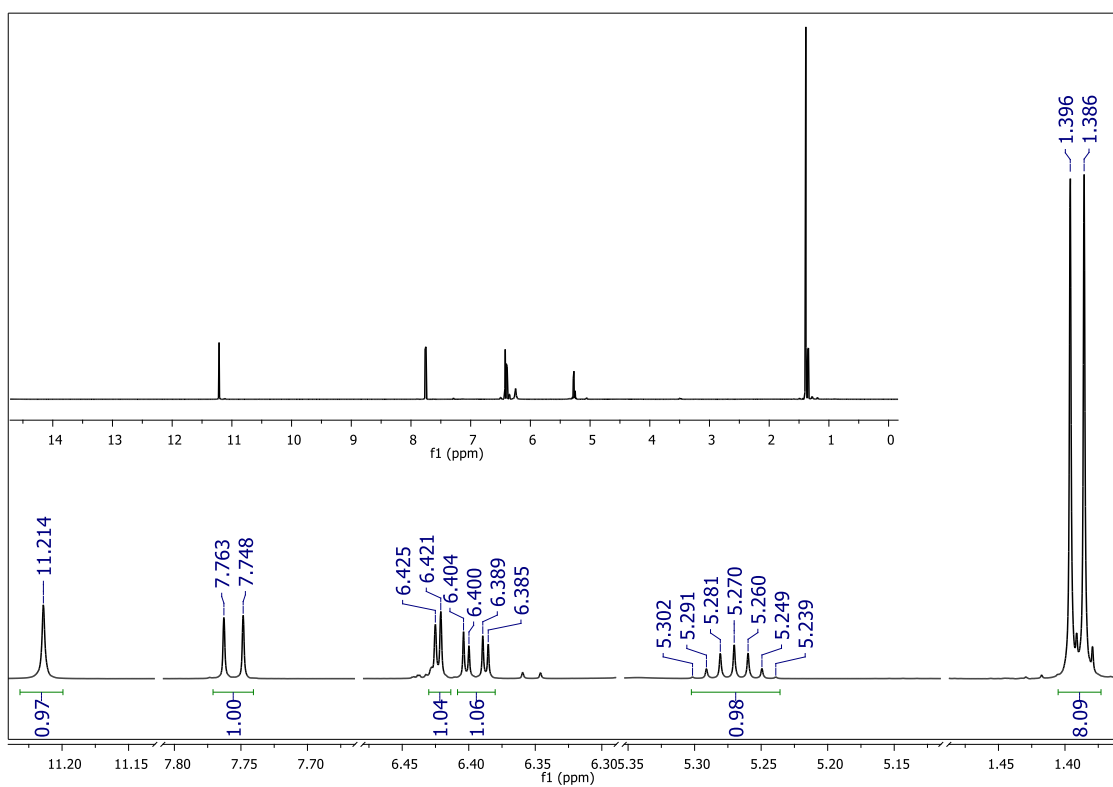

654

655

656 **Figure S9. II)**  $^{13}\text{C}$  NMR spectrum of compound **9** (150 MHz –  $\text{CDCl}_3$ )

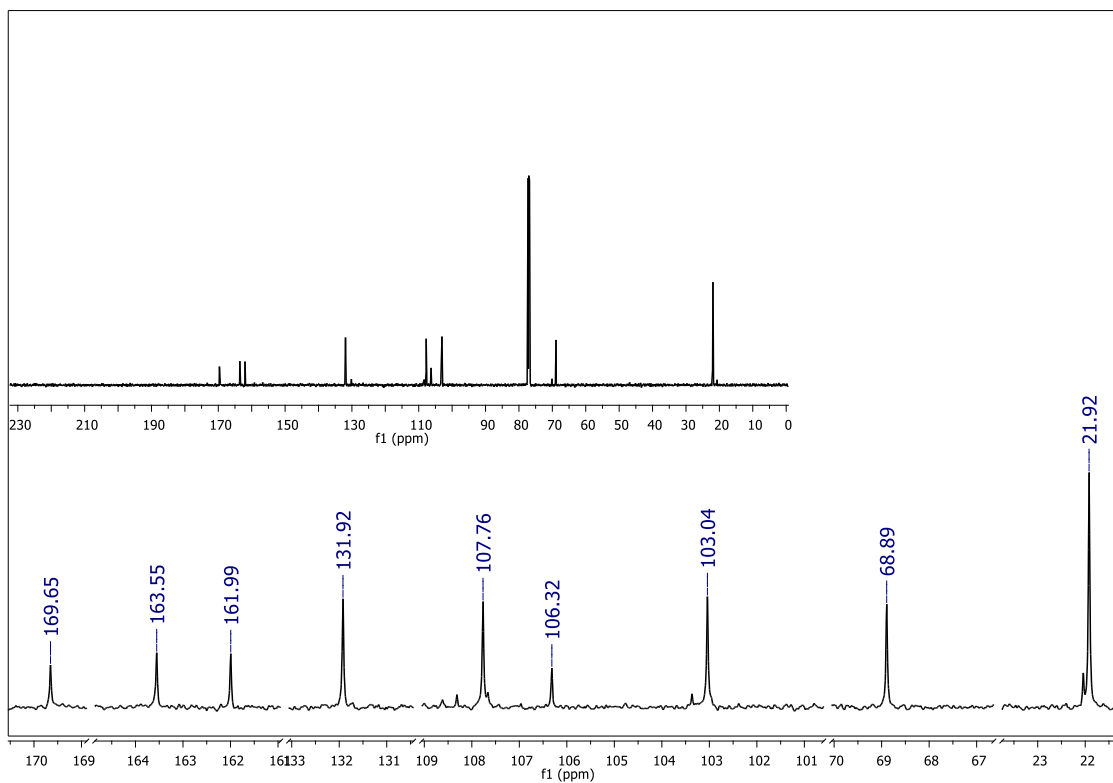

657

658

659 **Figure S9.** III) HPLC chromatogram of compound **9**

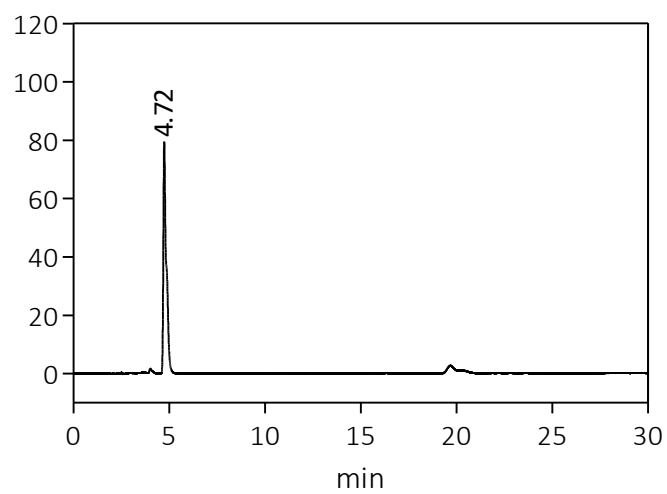

660

661

662

663

664

665

666

667

668

669

670

671

672

673

674

675

676

677

678 **Figure S10. I)**  $^1\text{H}$  NMR spectrum of compound **10** (600 MHz –  $\text{CDCl}_3$ )

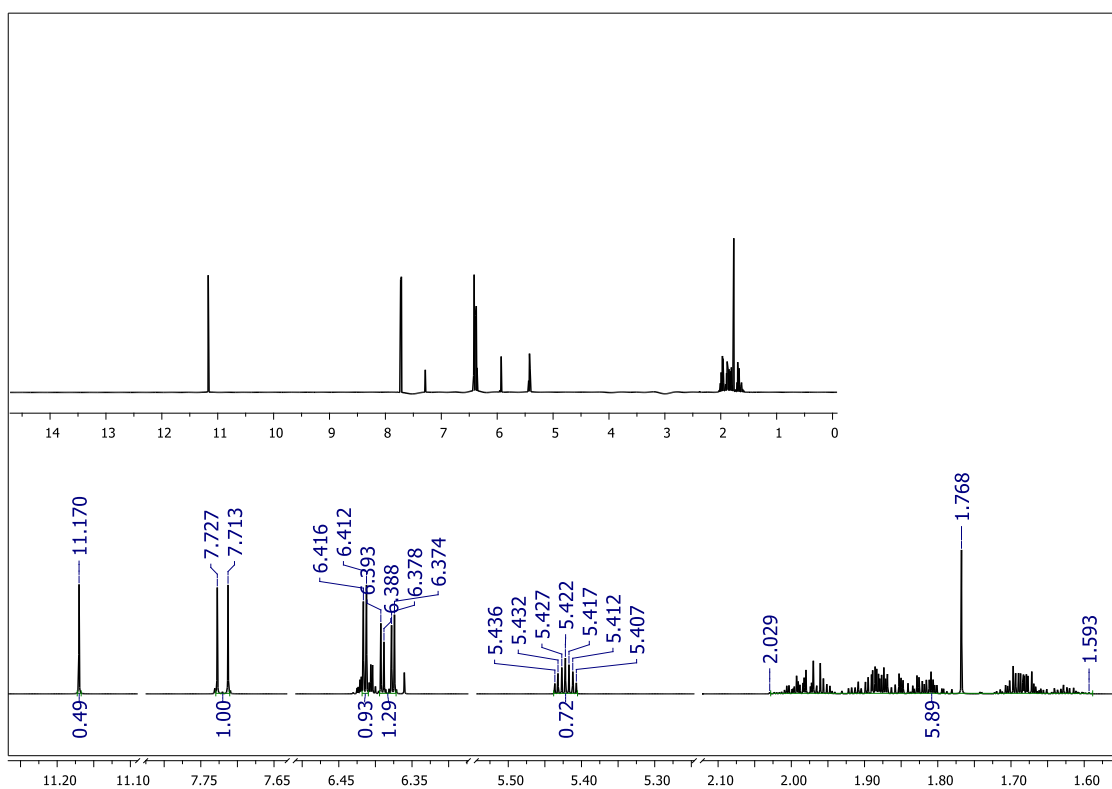

679

680

681 **Figure S10. II)**  $^{13}\text{C}$  NMR spectrum of compound **10** (150 MHz –  $\text{CDCl}_3$ )

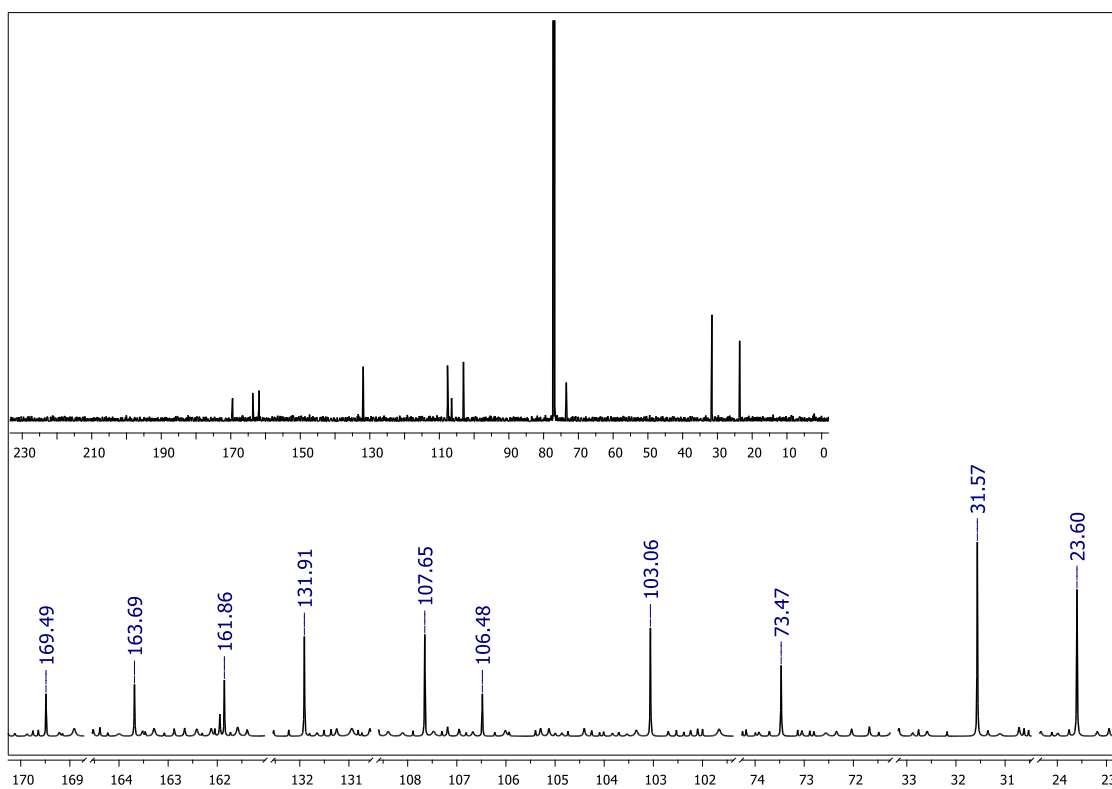

682

683



684 **Figure S10.** III) HPLC chromatogram of compound **10**

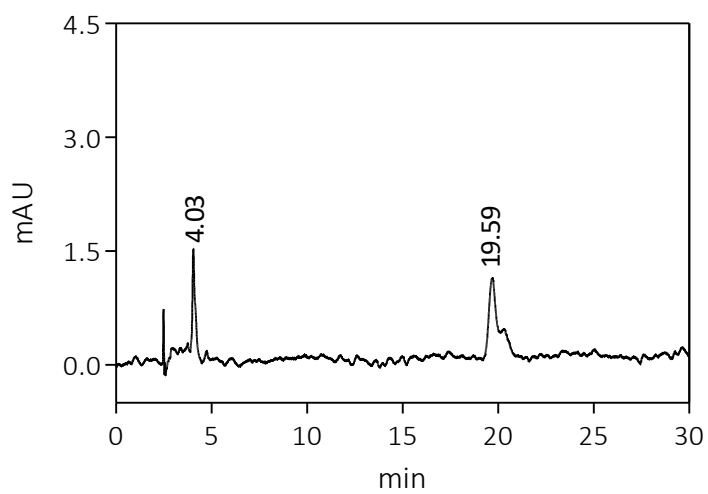

685

686

687

688

689

690

691

692

693

694

695

696

697

698

699

700

701

702



709 **Figure S11.** III) HPLC chromatogram of compound **11**

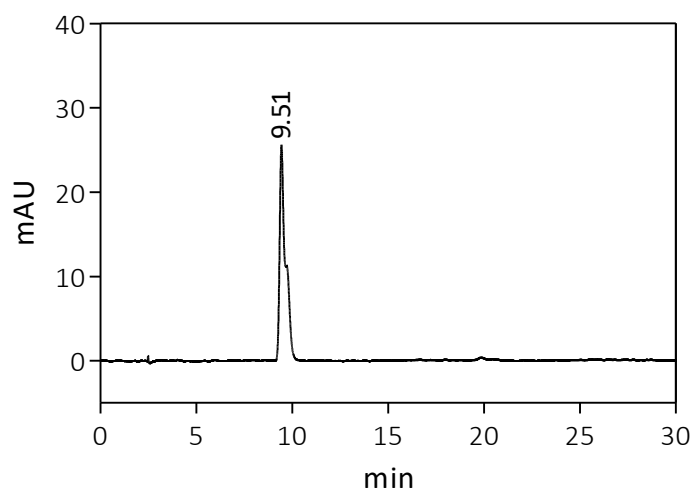

710  
711

712

713

714

715

716

717

718

719

720

721

722

723

724

725

726

727

728 **Figure S13. I)**  $^1\text{H}$  NMR spectrum of compound **13** (400 MHz –  $\text{CDCl}_3$ )

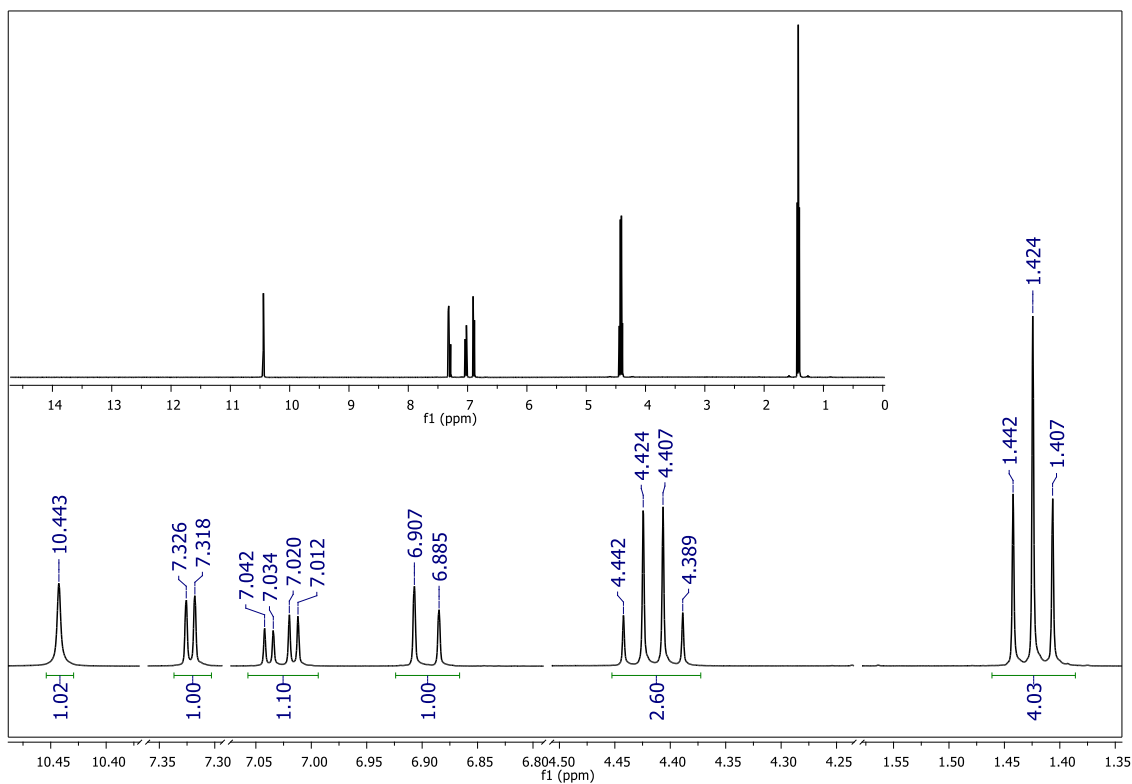

729

730

731 **Figure S13. II)**  $^{13}\text{C}$  NMR spectrum of compound **13** (100 MHz –  $\text{CDCl}_3$ )

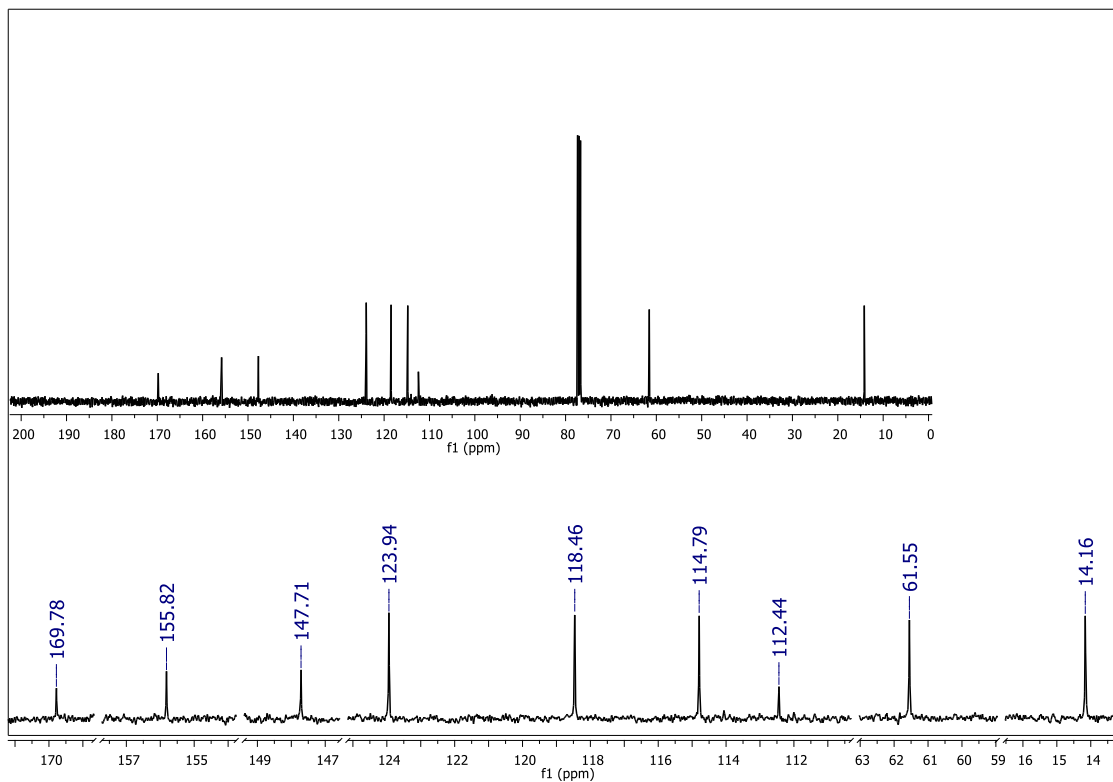

732

733

734 **Figure S13.** III) HPLC chromatogram of compound **13**

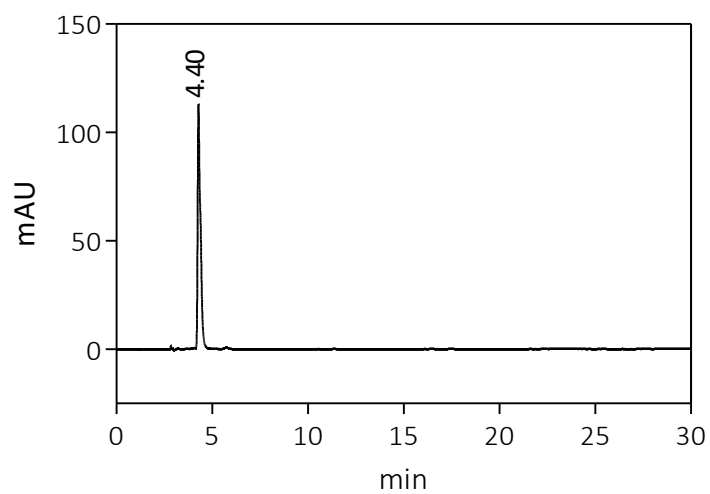

735

736

737

738

739

740

741

742

743

744

745

746

747

748

749

750

751

752

753 **Figure S14. I)**  $^1\text{H}$  NMR spectrum of compound **14** (400 MHz –  $\text{CDCl}_3$ )

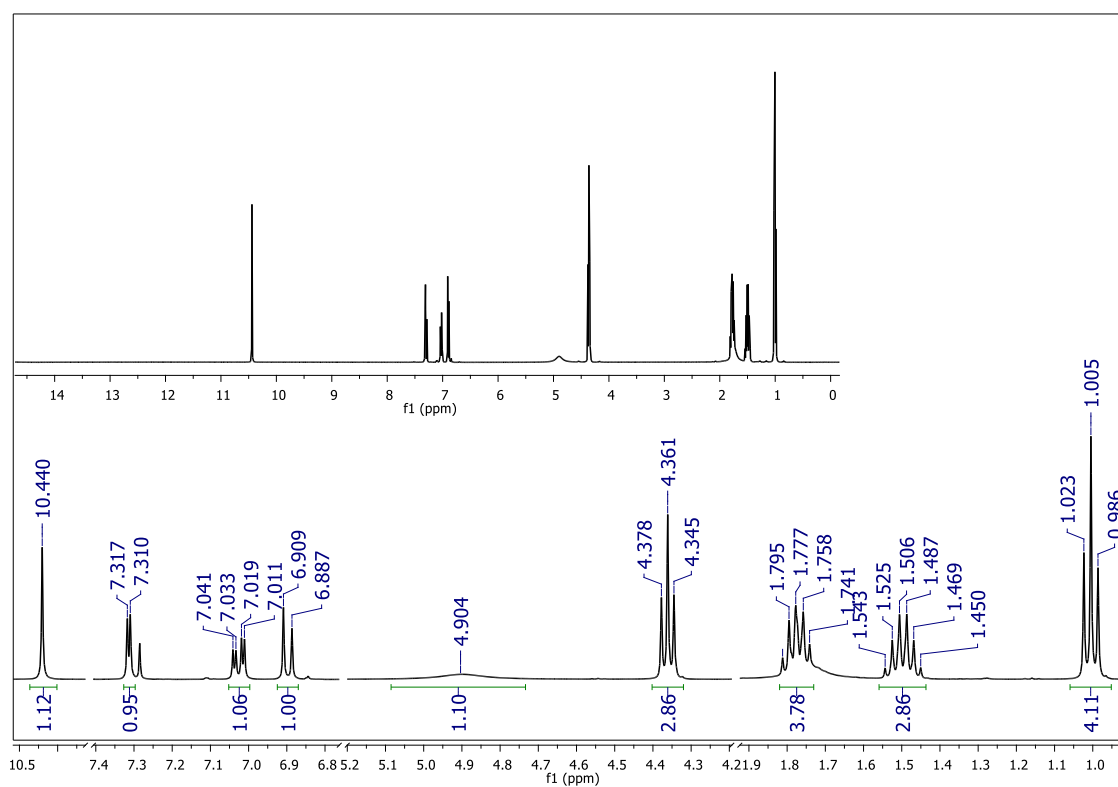

754

755

756 **Figure S14. II)**  $^{13}\text{C}$  NMR spectrum of compound **14** (100 MHz –  $\text{CDCl}_3$ )

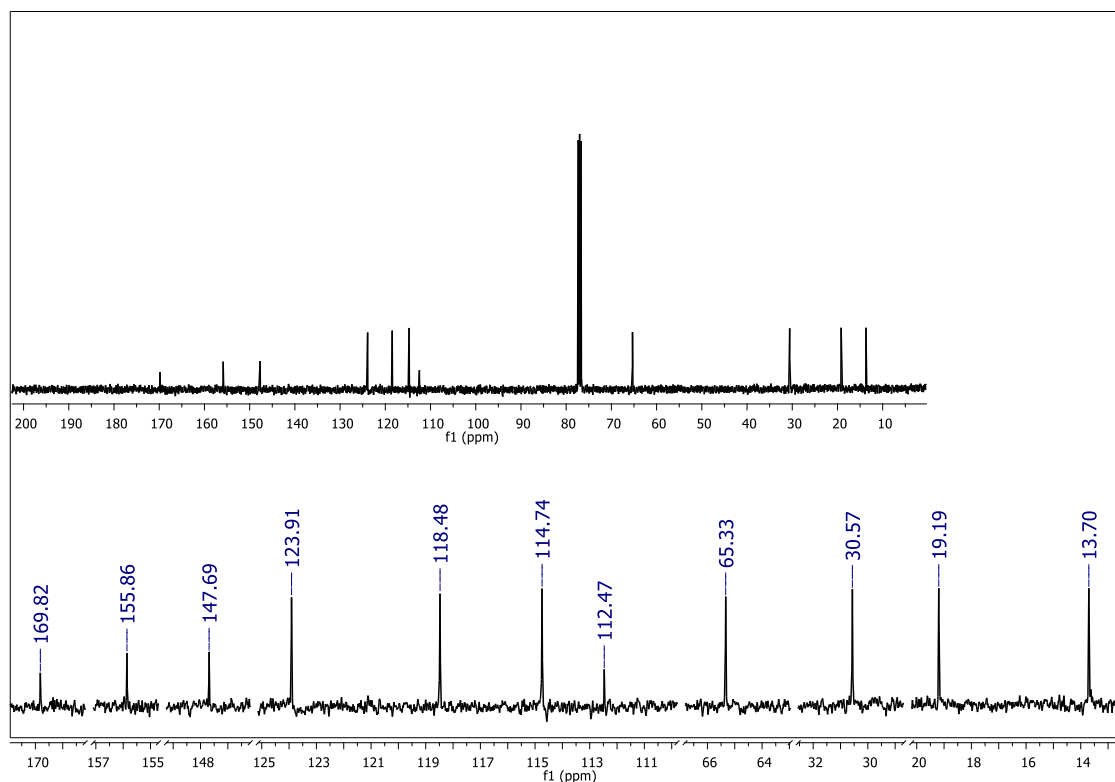

757

758 **Figure S14.** III) HPLC chromatogram of compound **14**

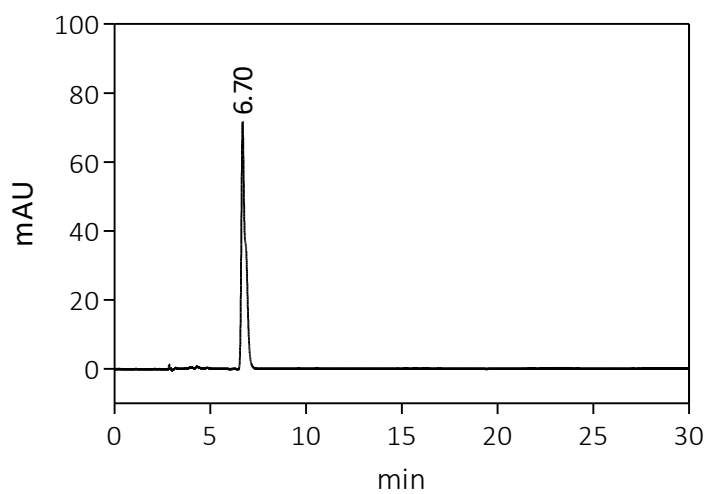

759

760

761

762

763

764

765

766

767

768

769

770

771

772

773

774

775

776

777 **Figure S15. I)**  $^1\text{H}$  NMR spectrum of compound **15** (400 MHz –  $\text{CDCl}_3$ )

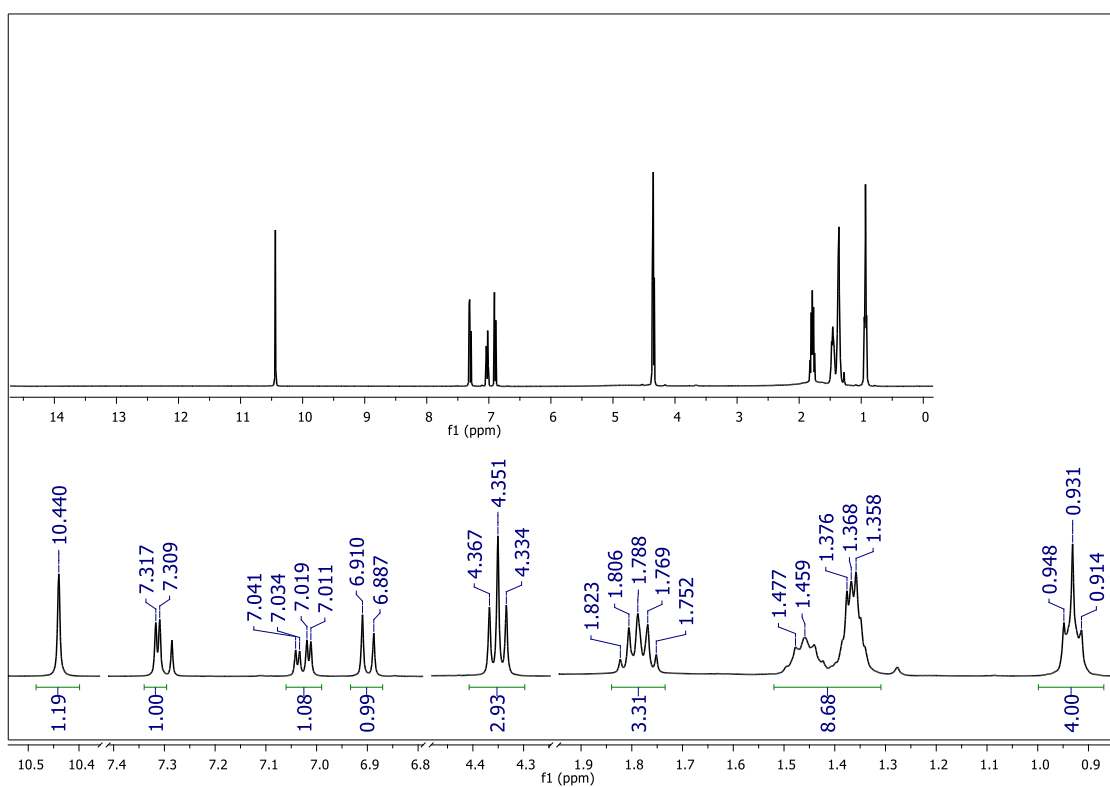

780 **Figure S15. II)**  $^{13}\text{C}$  NMR spectrum of compound **15** (100 MHz –  $\text{CDCl}_3$ )

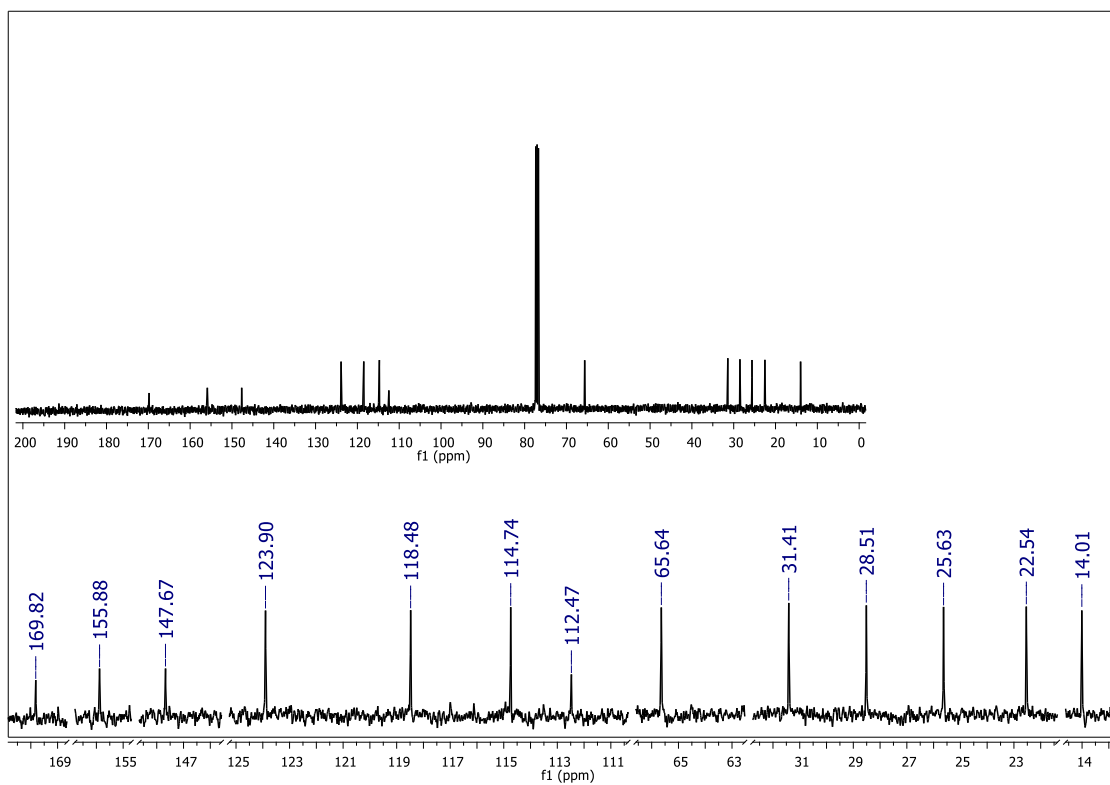



782 **Figure S15.** III) HPLC chromatogram of compound **15**

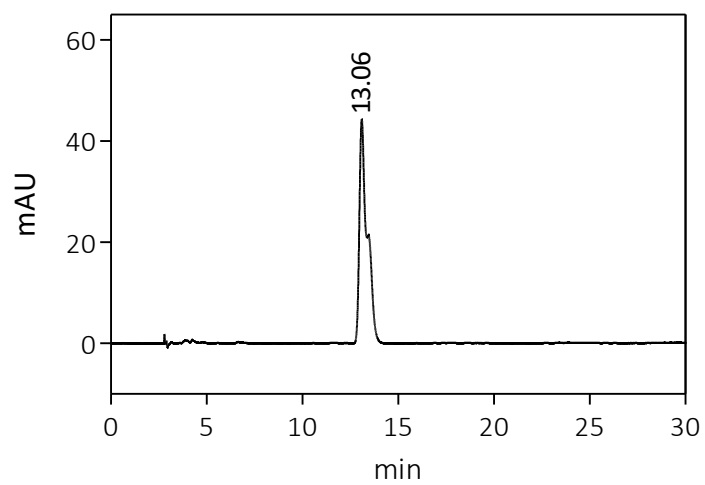

783

784

785

786

787

788

789

790

791

792

793

794

795

796

797

798

799

800 **Figure S16. I)**  $^1\text{H}$  NMR spectrum of compound **16** (600 MHz –  $\text{CDCl}_3$ )

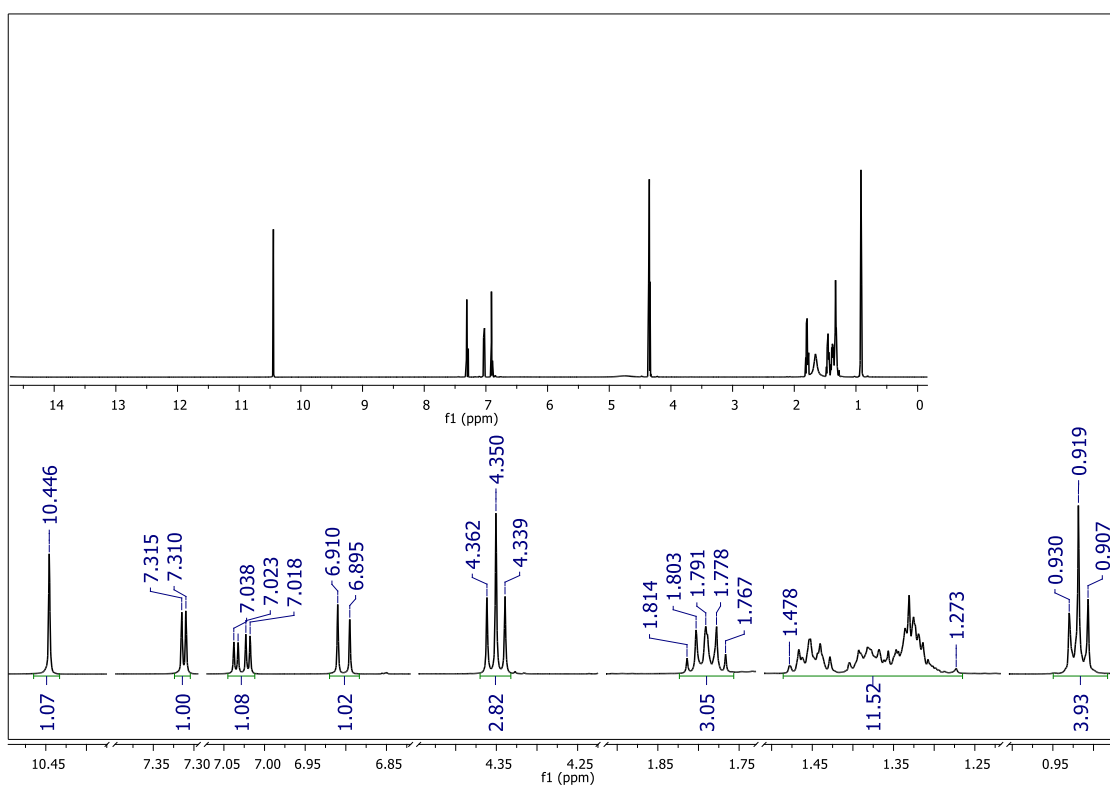

801

802

803 **Figure S16. II)**  $^{13}\text{C}$  NMR spectrum of compound **16** (150 MHz –  $\text{CDCl}_3$ )

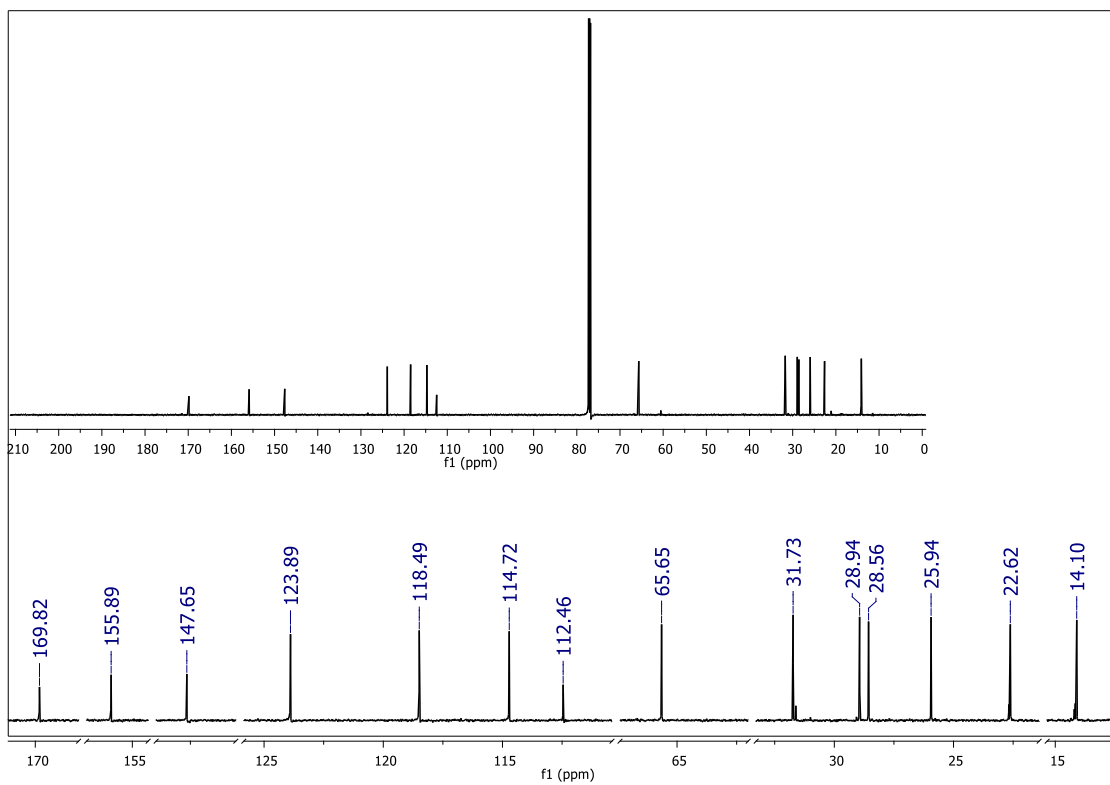

804

805 **Figure S16.** III) HPLC chromatogram of compound **16**

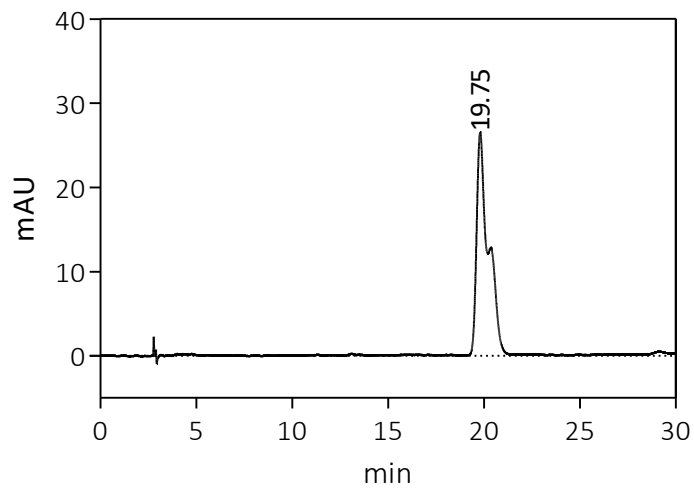

806

807

808

809

810

811

812

813

814

815

816

817

818

819

820

821

822

823 **Figure S17. I)**  $^1\text{H}$  NMR spectrum of compound **17** (400 MHz –  $\text{CDCl}_3$ )

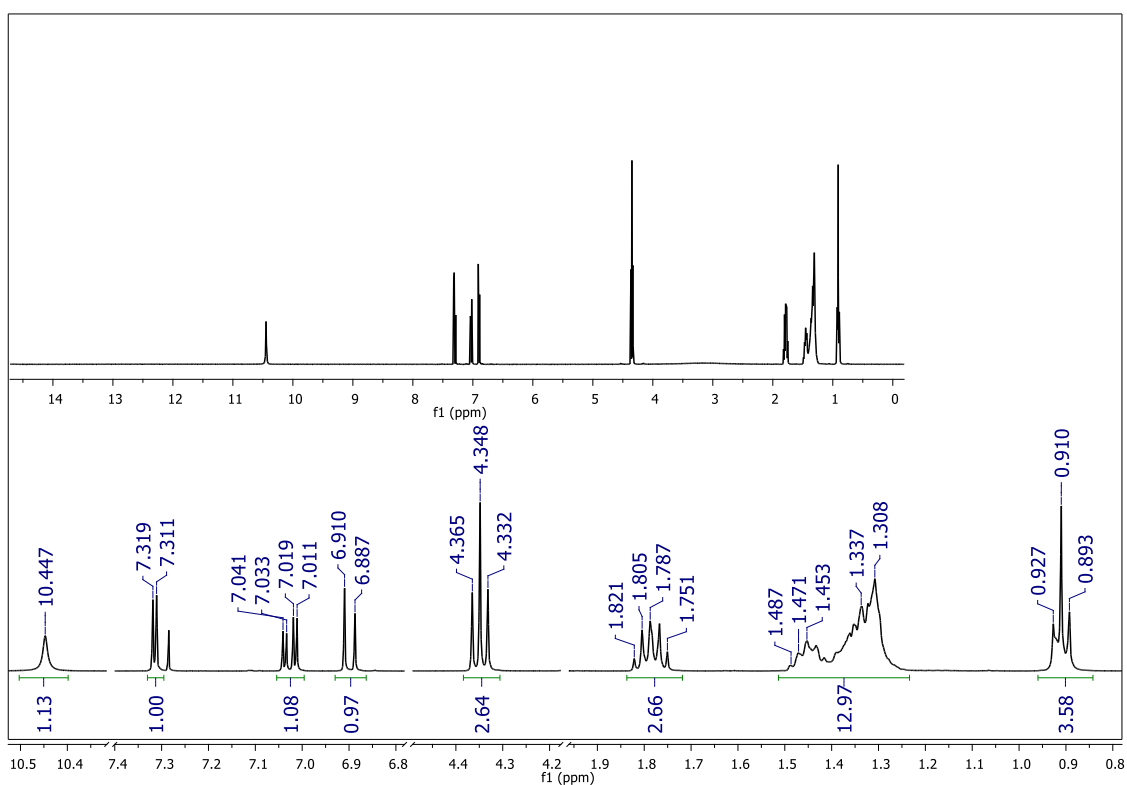

824

825

826 **Figure S17. II)**  $^{13}\text{C}$  NMR spectrum of compound **17** (100 MHz –  $\text{CDCl}_3$ )

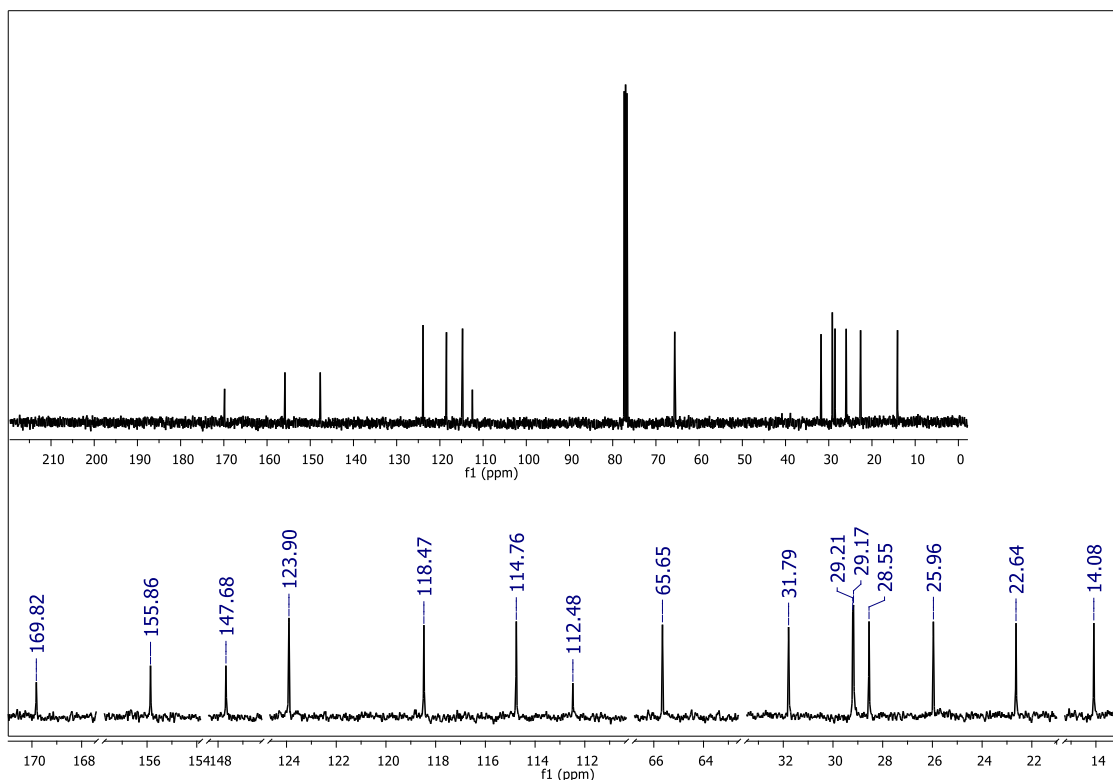

827

828 **Figure S17.** III) HPLC chromatogram of compound **17**

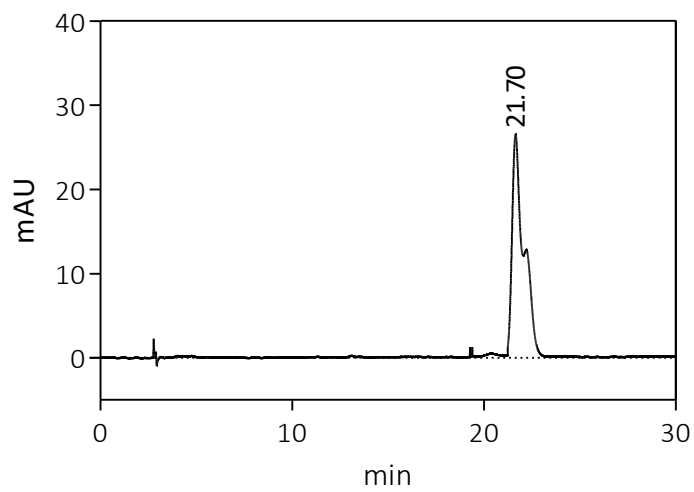

829

830

831

832

833

834

835

836

837

838

839

840

841

842

843

844

845

846 **Figure S18. I)**  $^1\text{H}$  NMR spectrum of compound **18** (600 MHz –  $\text{CDCl}_3$ )

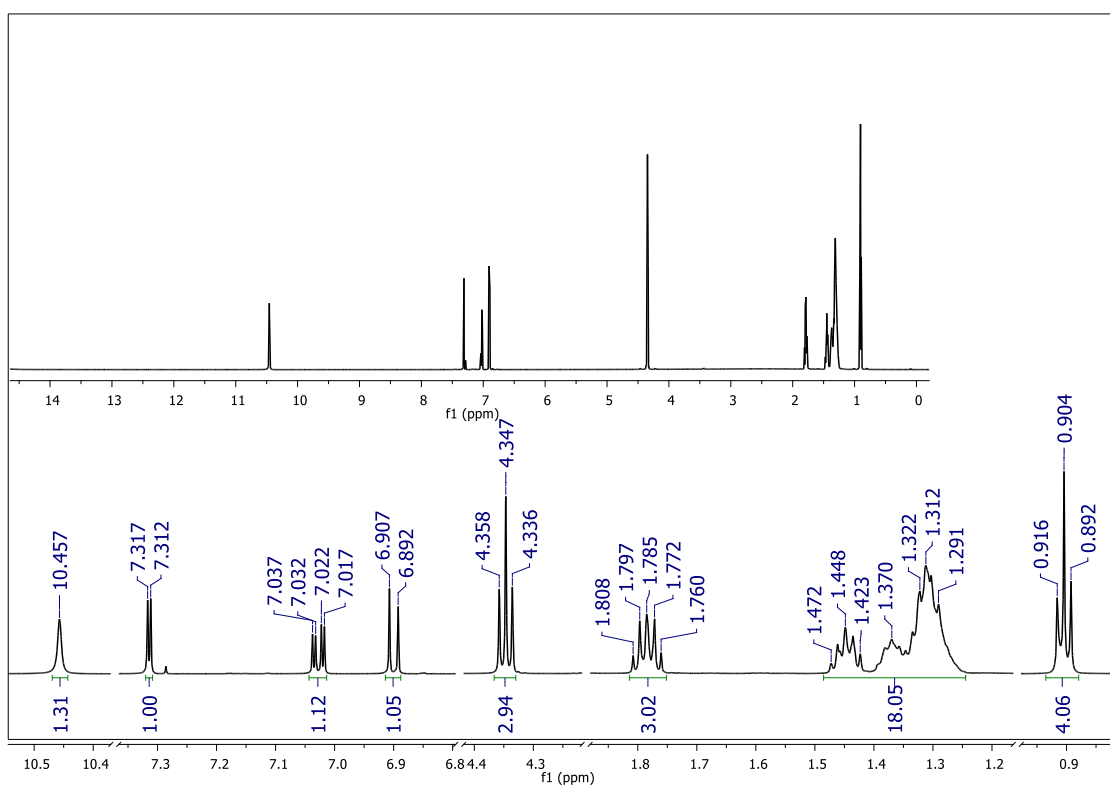

847

848

849 **Figure S18. II)**  $^{13}\text{C}$  NMR spectrum of compound **18** (100 MHz –  $\text{CDCl}_3$ )

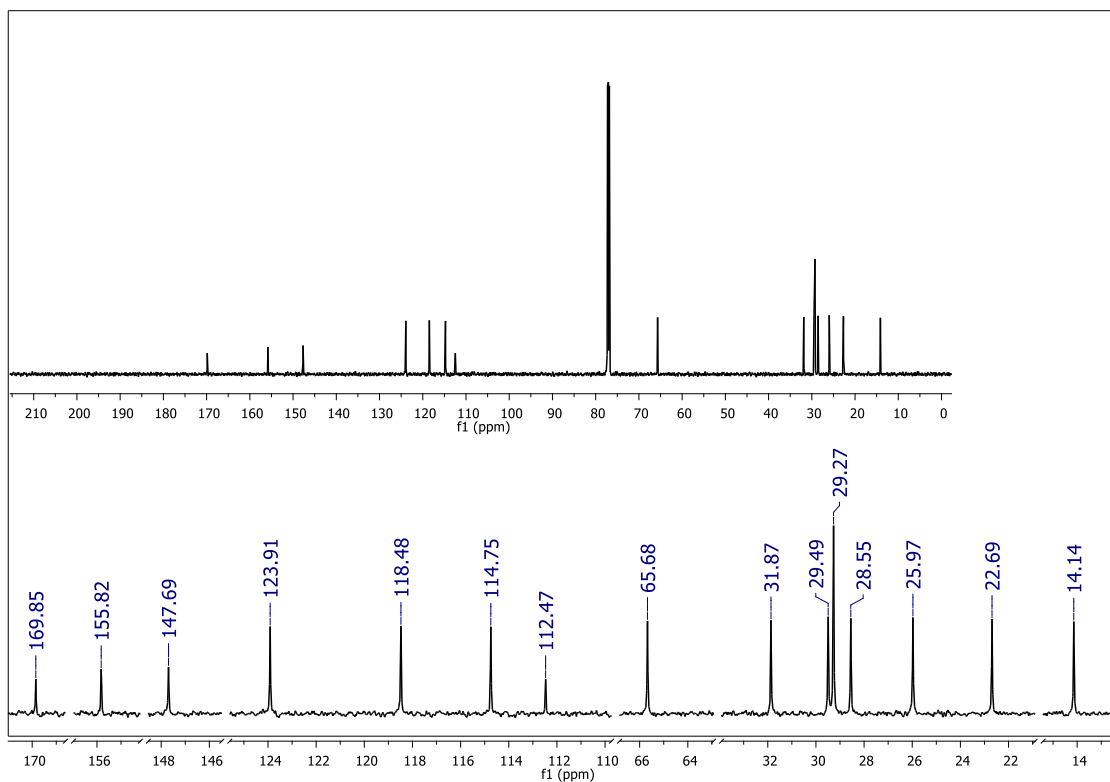

850

851 **Figure S18.** III) HPLC chromatogram of compound **18**

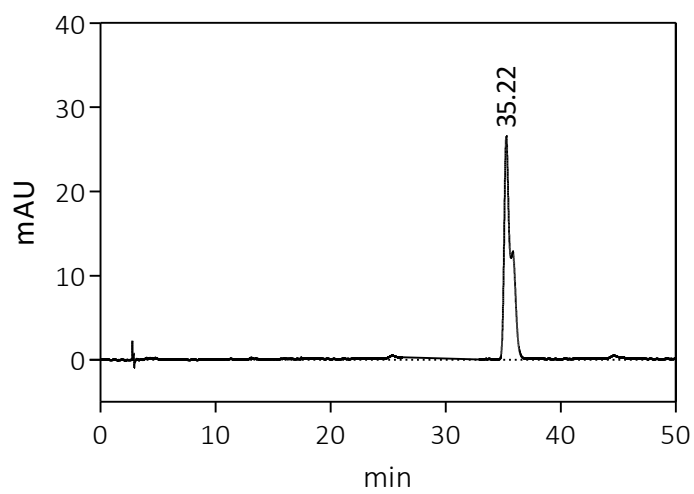

852

853

854

855

856

857

858

859

860

861

862

863

864

865

866

867

868

869 **Figure S19. I)**  $^1\text{H}$  NMR spectrum of compound **19** (400 MHz –  $\text{CDCl}_3$ )

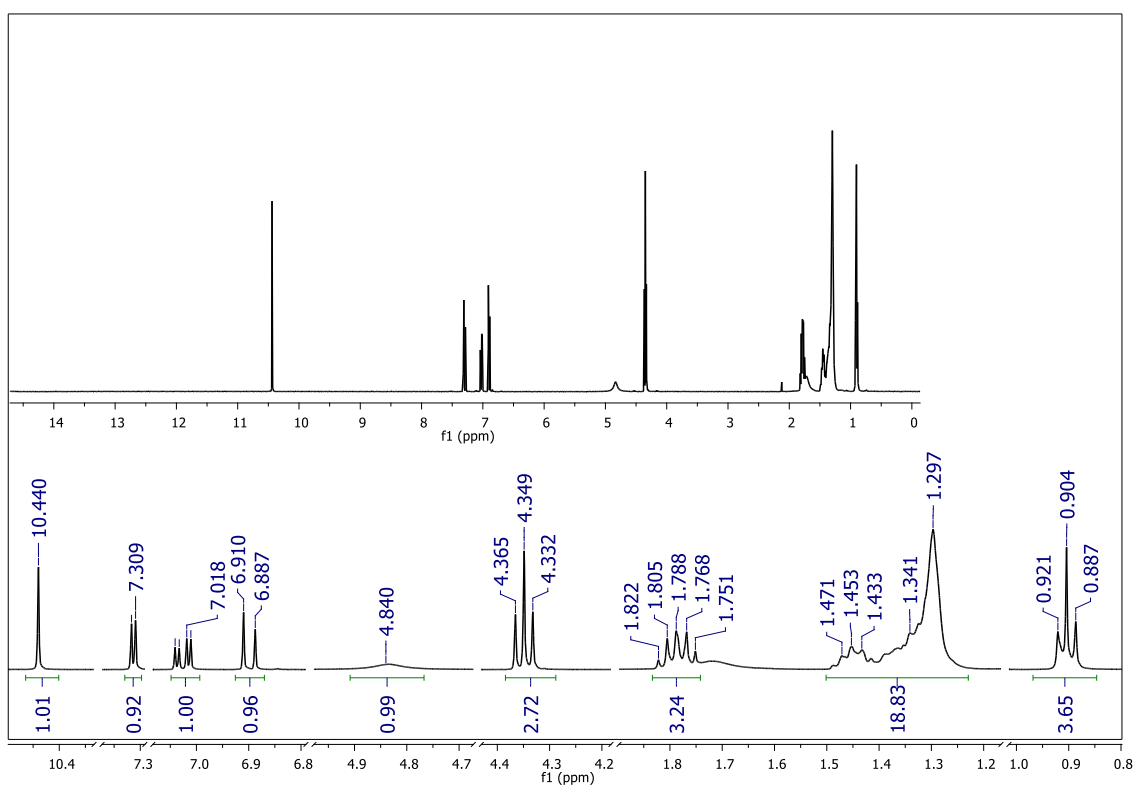

870

871

872 **Figure S19. II)**  $^{13}\text{C}$  NMR spectrum of compound **19** (100 MHz –  $\text{CDCl}_3$ )

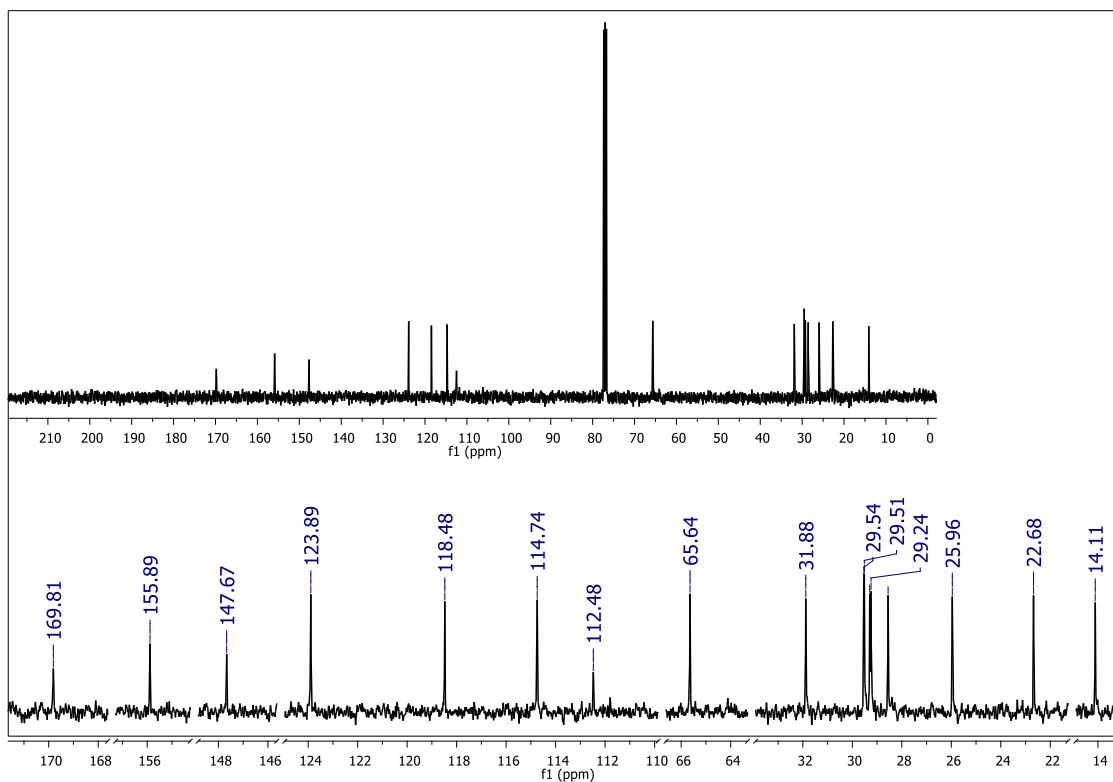

873



874 **Figure S19.** III) HPLC chromatogram of compound **19**

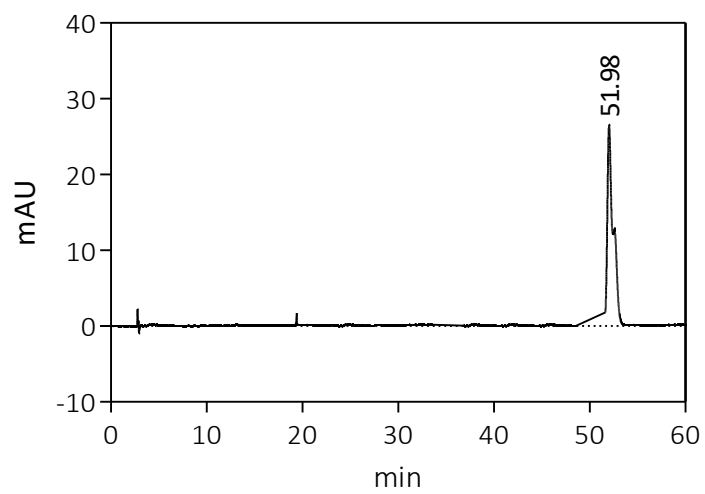

875

876

877

878

879

880

881

882

883

884

885

886

887

888

889

890

891

892 **Figure S20. I)**  $^1\text{H}$  NMR spectrum of compound **20** (300 MHz –  $\text{CDCl}_3$ )

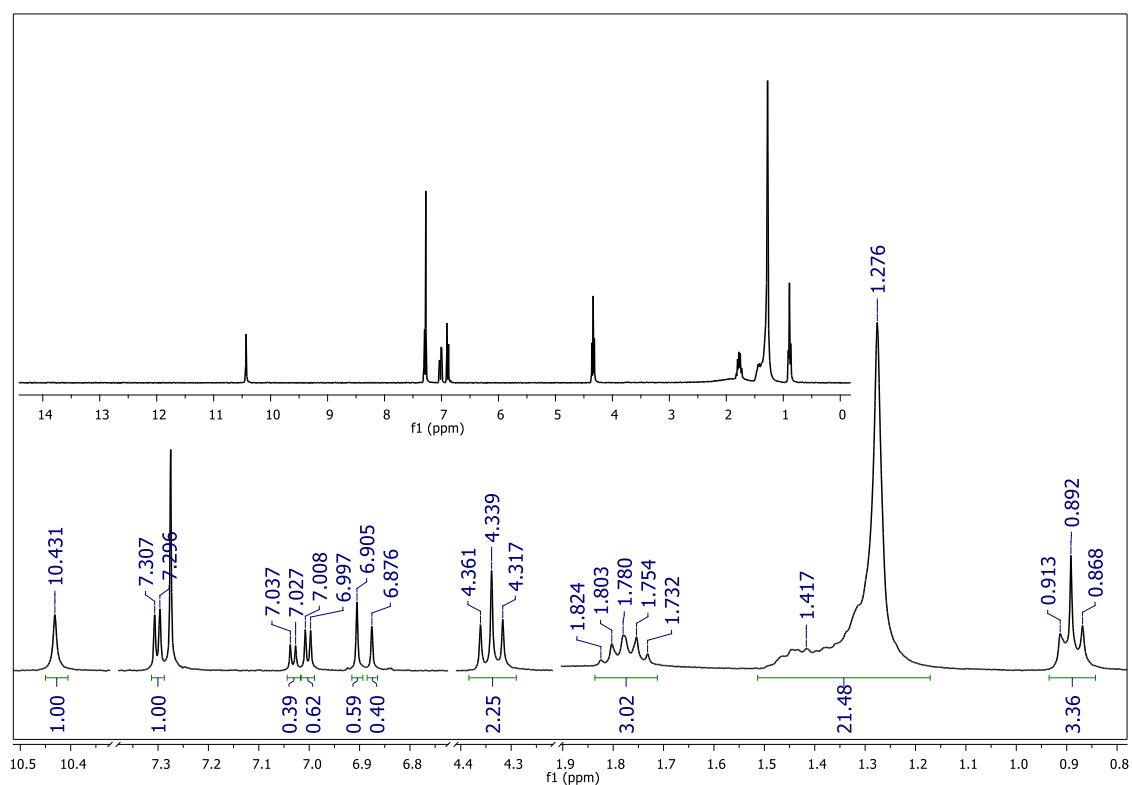

893

894

895 **Figure S20. II)**  $^{13}\text{C}$  NMR spectrum of compound **20** (100 MHz –  $\text{CDCl}_3$ )

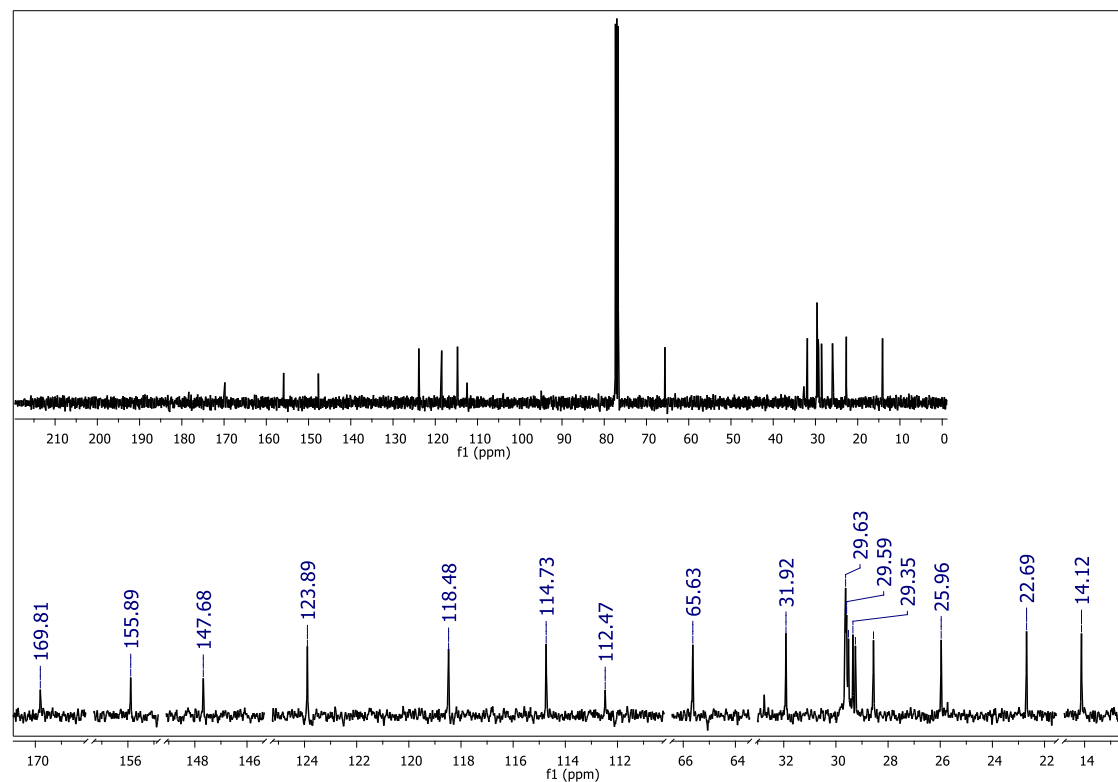

896

897 **Figure S20.** III) HPLC chromatogram of compound **20**

898

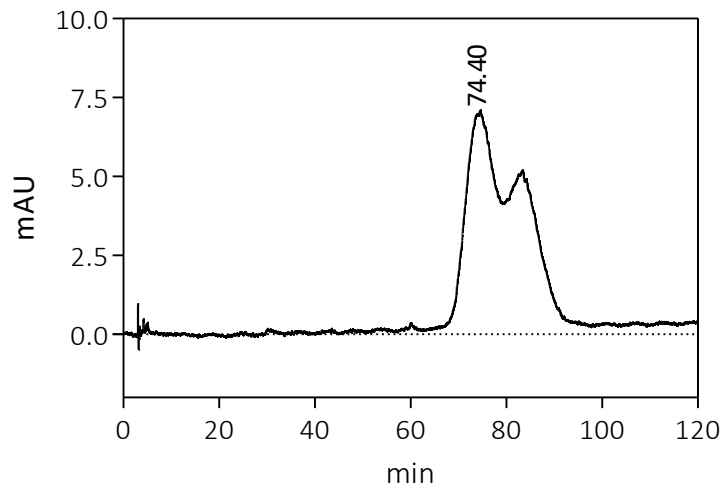

899

900

901

902

903

904

905

906

907

908

909

910

911

912

913

914

915 **Figure S21. I)**  $^1\text{H}$  NMR spectrum of compound **21** (400 MHz –  $\text{CDCl}_3$ )

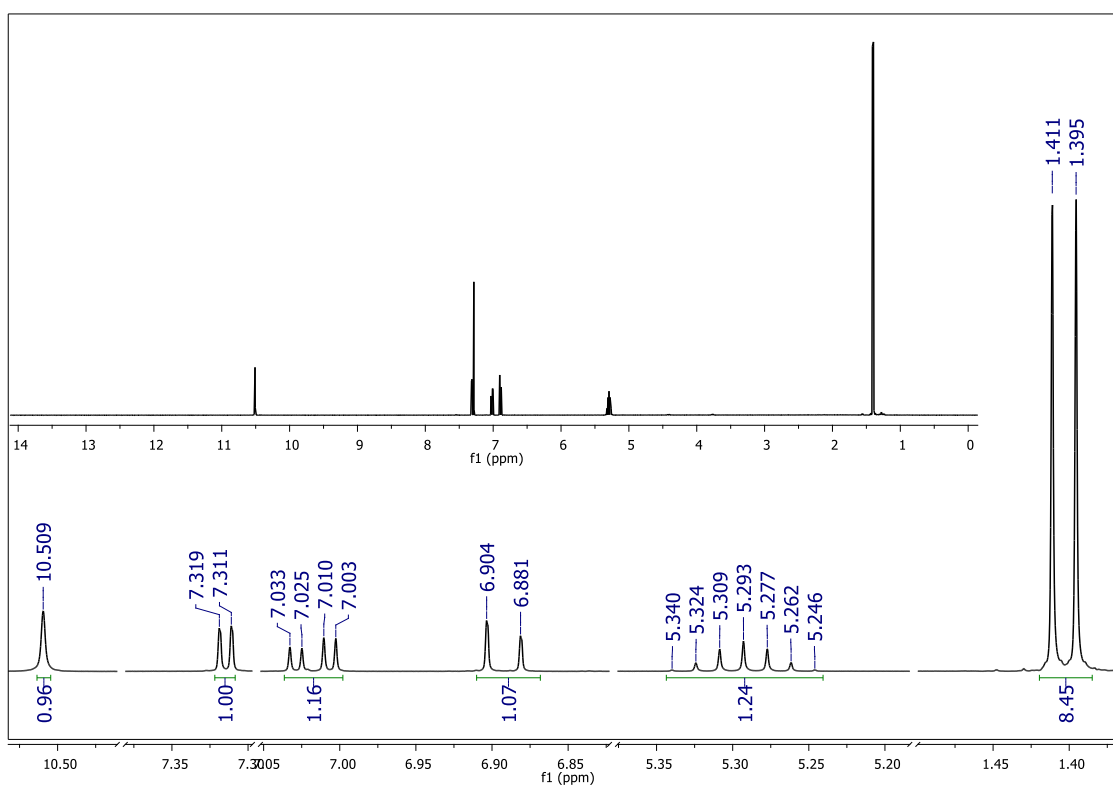

916

917

918 **Figure S21. II)**  $^{13}\text{C}$  NMR spectrum of compound **21** (150 MHz –  $\text{CDCl}_3$ )

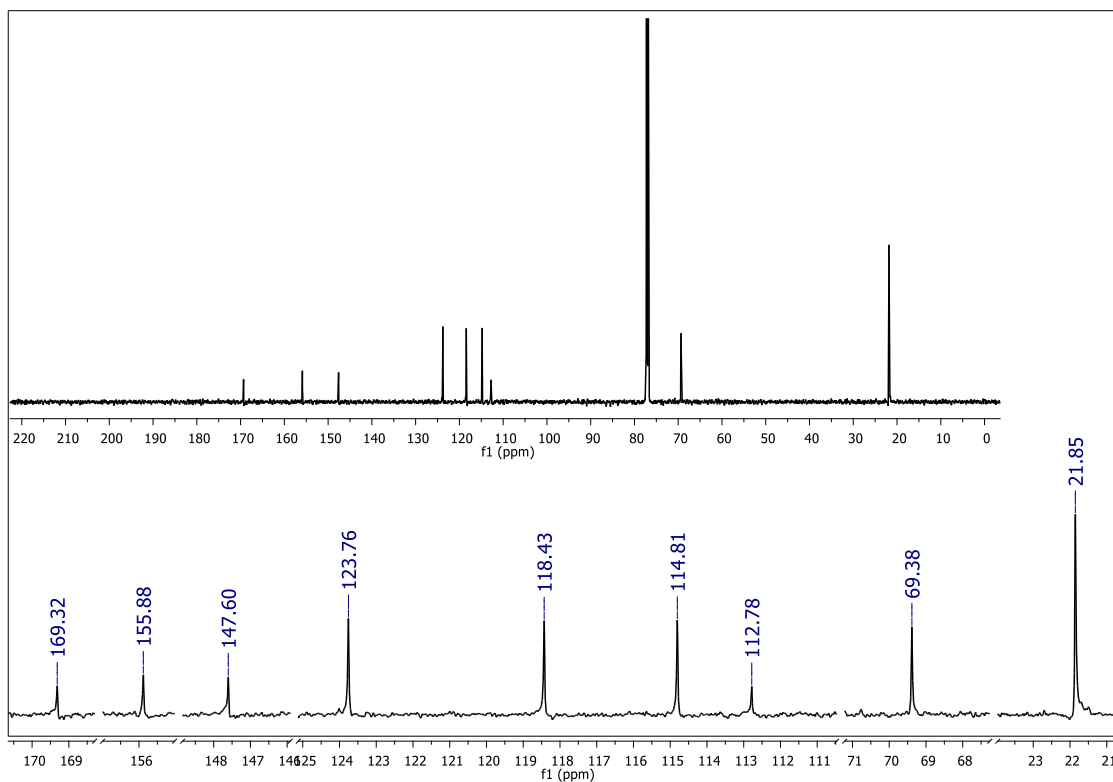

919

920 **Figure S21.** III) HPLC chromatogram of compound **21**

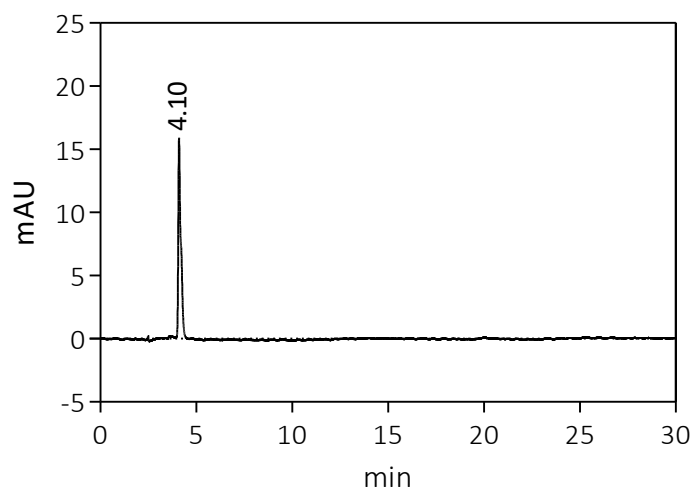

921

922

923

924

925

926

927

928

929

930

931

932

933

934

935

936

937

938 **Figure S22. I)**  $^1\text{H}$  NMR spectrum of compound **22** (300 MHz –  $\text{CDCl}_3$ )

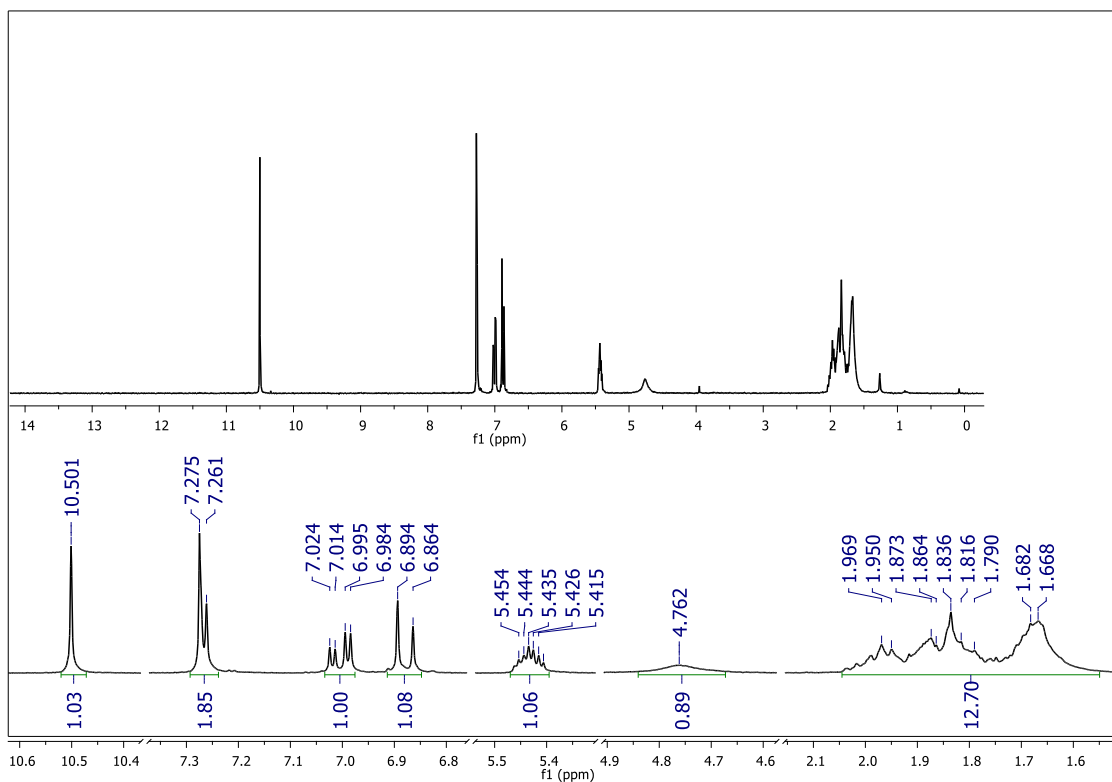

939

940

941 **Figure S22. II)**  $^{13}\text{C}$  NMR spectrum of compound **22** (150 MHz –  $\text{CDCl}_3$ )

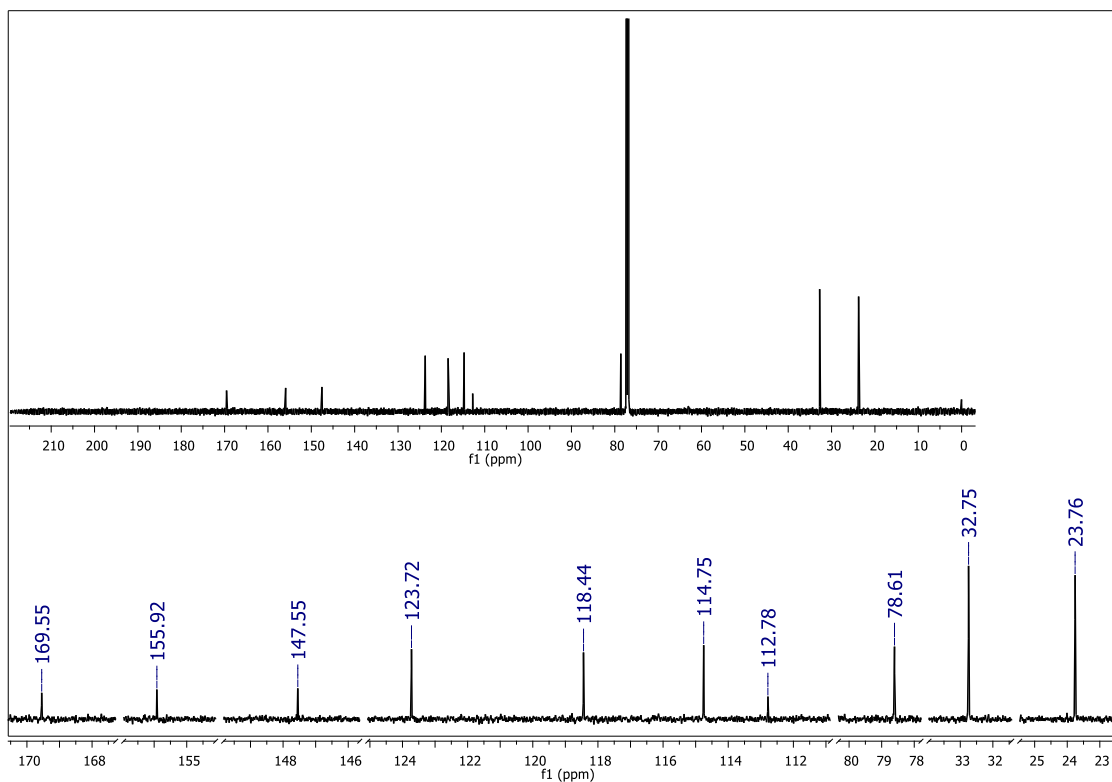

942

943 **Figure S22.** III) HPLC chromatogram of compound **22**

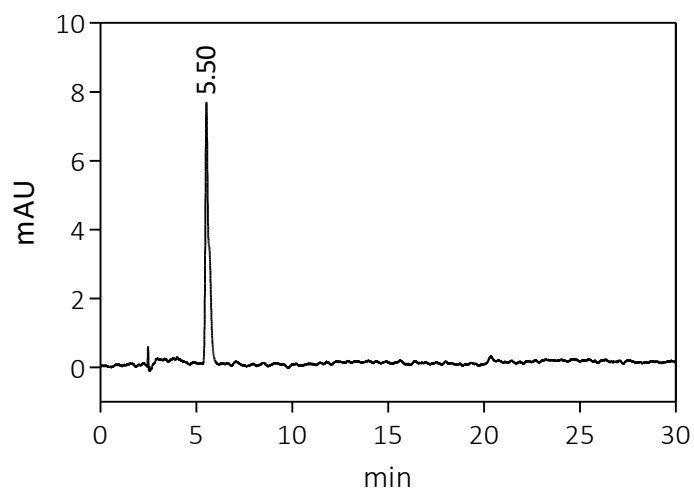

944

945

946

947

948

949

950

951

952

953

954

955

956

957

958

959

960

961 **Figure S23. I)**  $^1\text{H}$  NMR spectrum of compound **23** (300 MHz –  $\text{CDCl}_3$ )

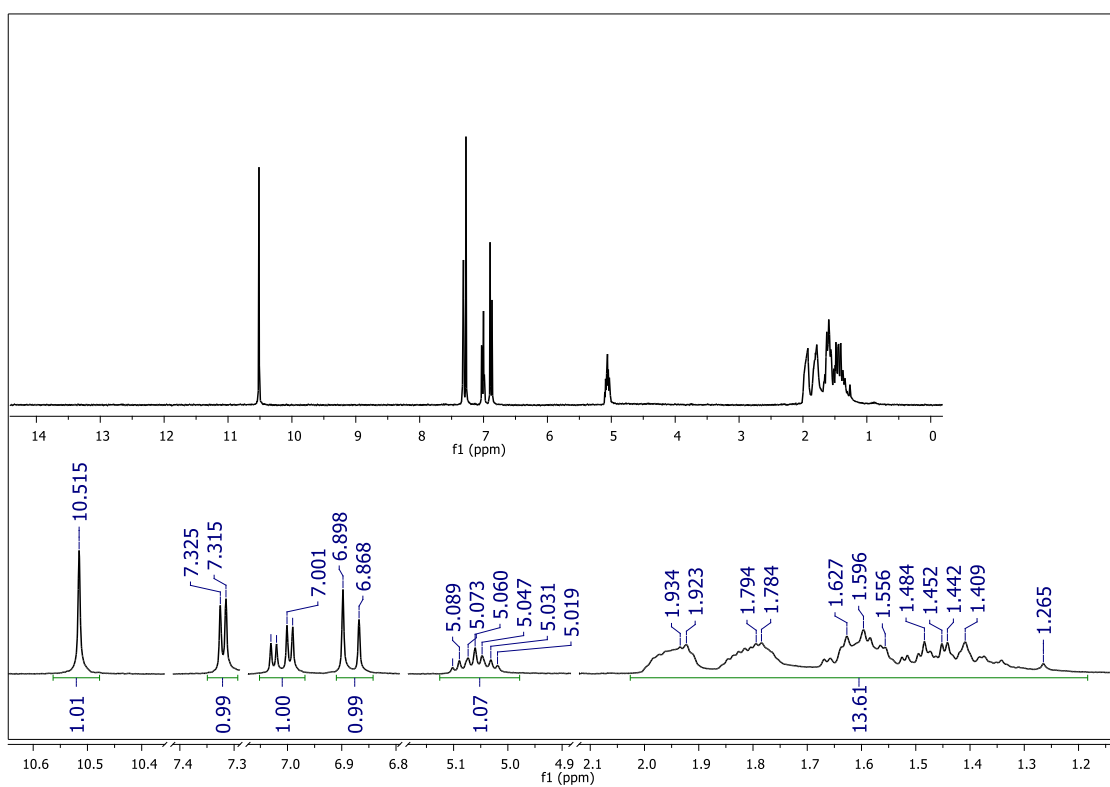

962

963

964 **Figure S23. II)**  $^{13}\text{C}$  NMR spectrum of compound **23** (150 MHz –  $\text{CDCl}_3$ )

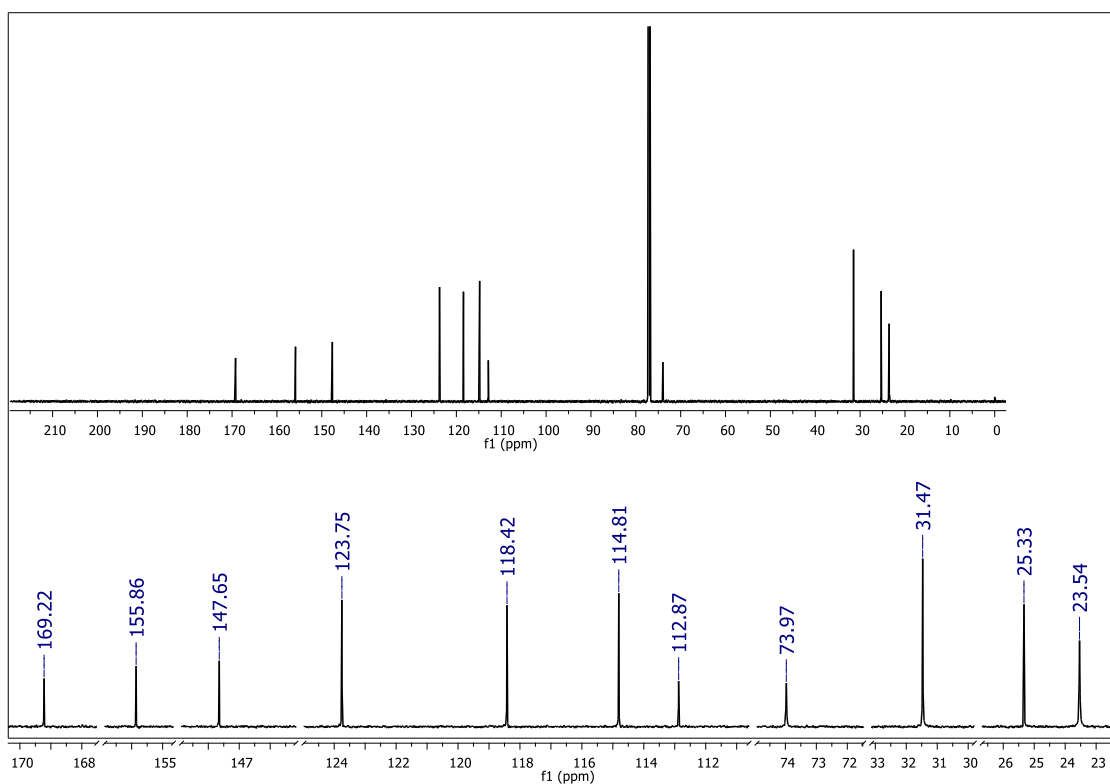

965



966 **Figure S23.** III) HPLC chromatogram of compound **23**

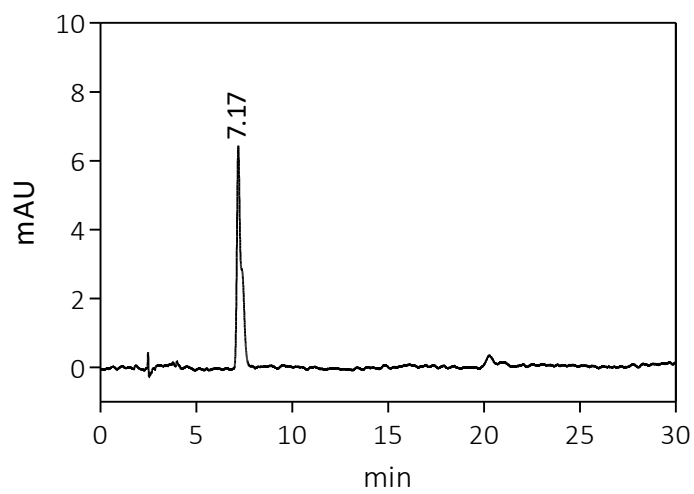

967

968

969

970

971

972

973

974

975

976

977

978

979

980

981

982

983

984 **Figure S24. I)**  $^1\text{H}$  NMR spectrum of compound **24** (400 MHz –  $\text{CDCl}_3$ )

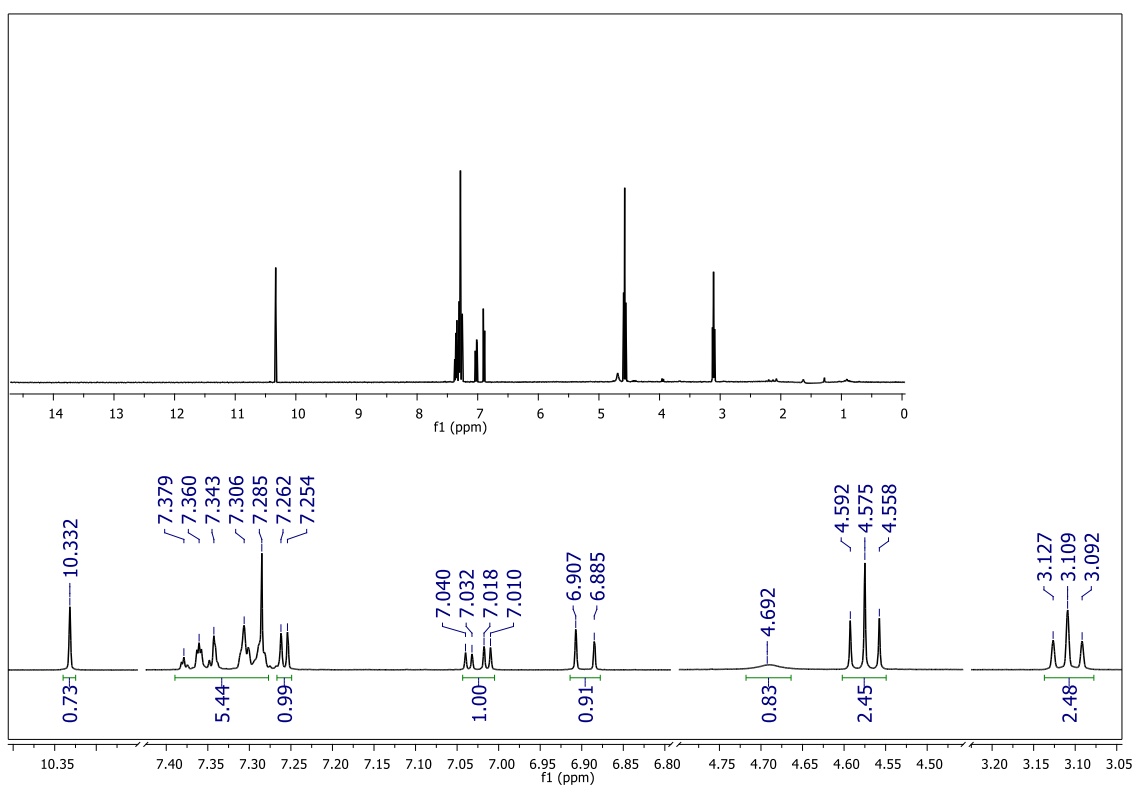

985

986

987 **Figure S24. II)**  $^{13}\text{C}$  NMR spectrum of compound **24** (150 MHz –  $\text{CDCl}_3$ )

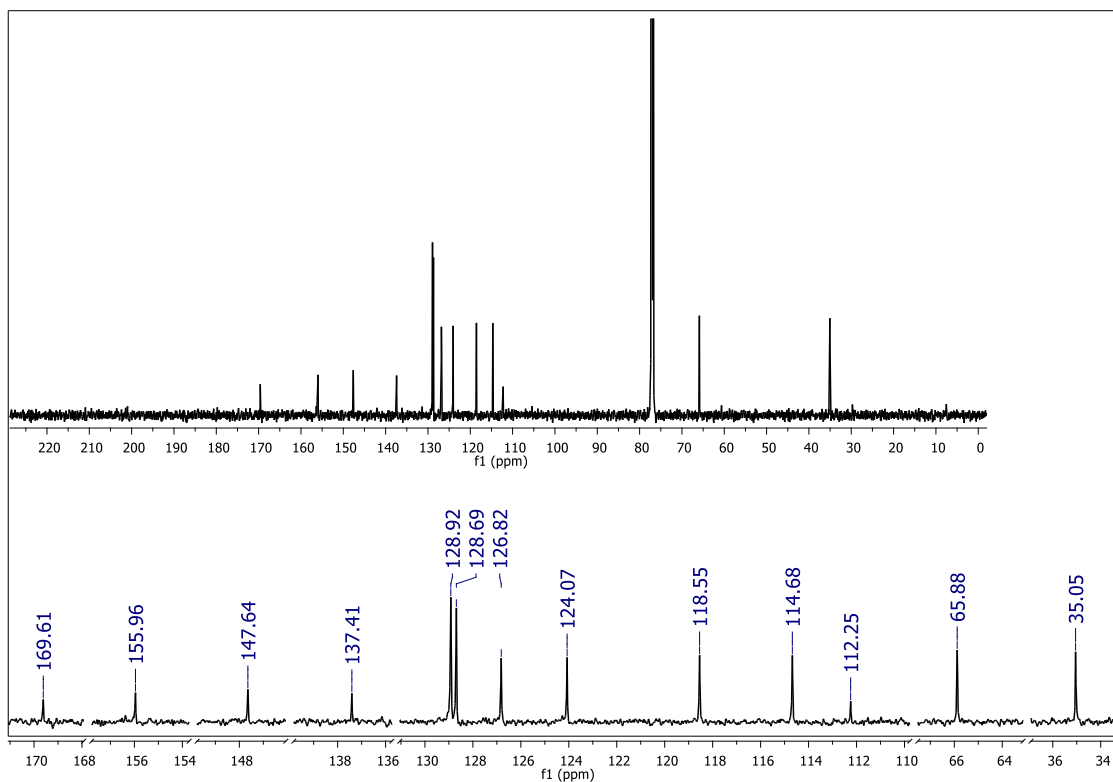

988

989 **Figure S24.** III) HPLC chromatogram of compound **24**

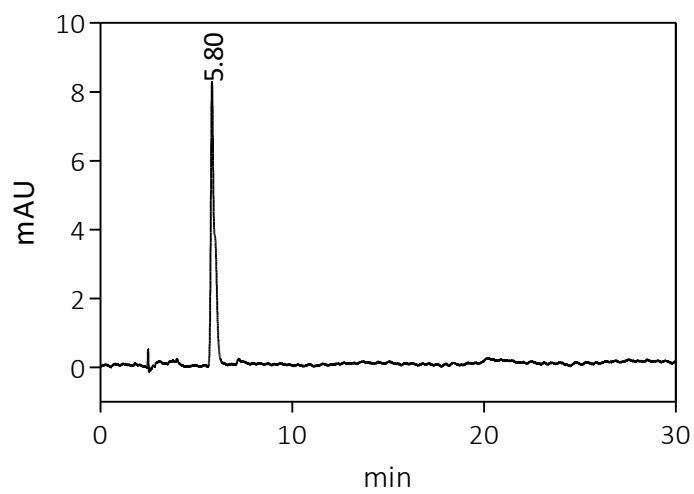

990

991

992

993

994

995

996

997

998

999

1000

1001

1002

1003

1004

1005

1006

1007 **Figure S25. I)**  $^1\text{H}$  NMR spectrum of compound **25** (400 MHz –  $\text{DMSO-}d_6$ )

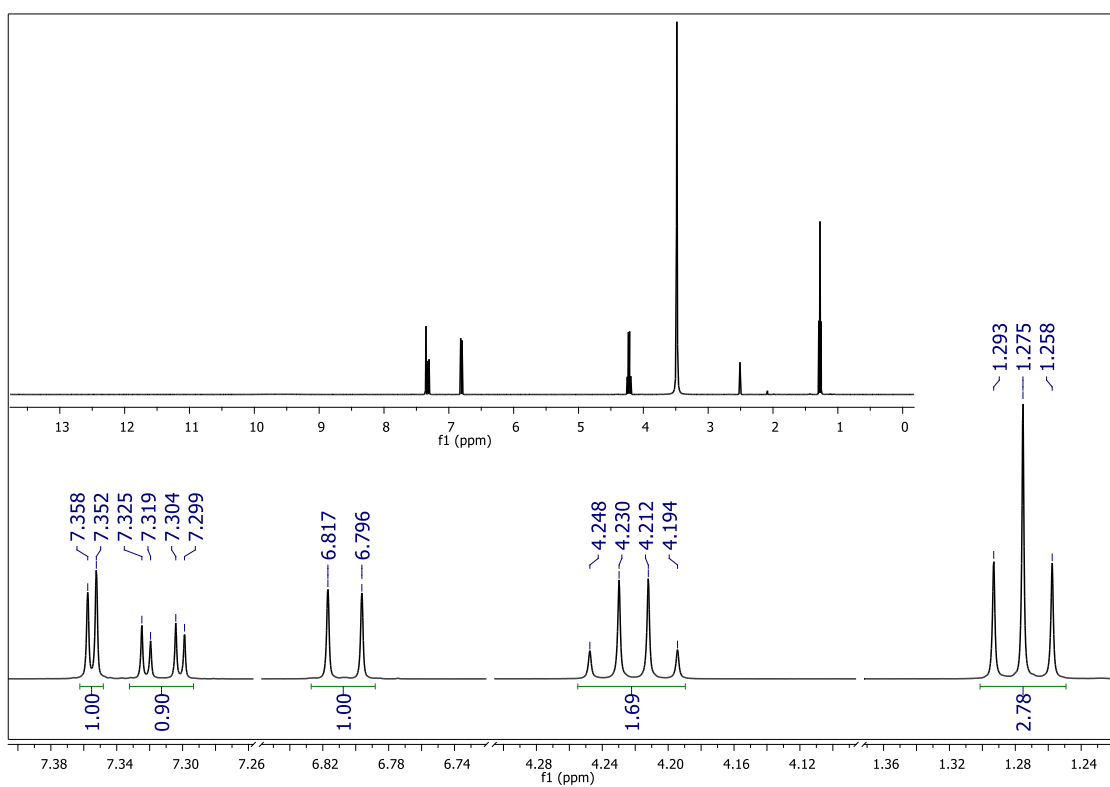

1008

1009

1010 **Figure S25. II)**  $^{13}\text{C}$  NMR spectrum of compound **25** (100 MHz –  $\text{DMSO-}d_6$ )

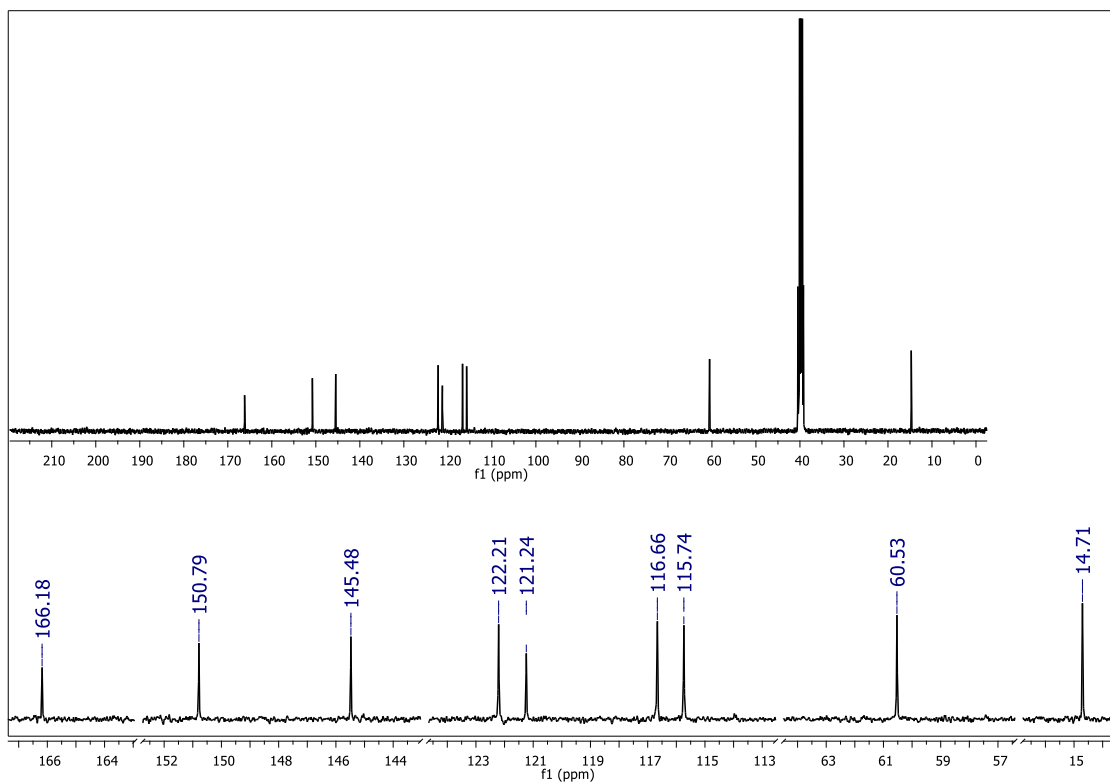

1011

1012 **Figure S25.** III) HPLC chromatogram of compound **25**

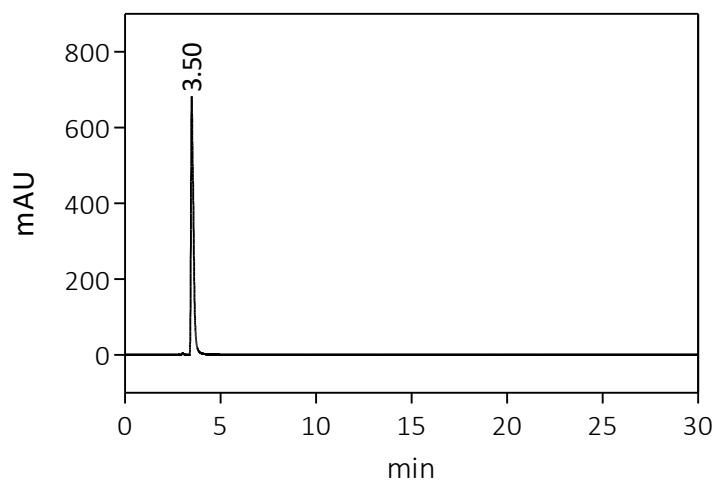

1013

1014

1015

1016

1017

1018

1019

1020

1021

1022

1023

1024

1025

1026

1027

1028

1029

1030 **Figure S26. I)**  $^1\text{H}$  NMR spectrum of compound **26** (400 MHz –  $\text{CDCl}_3$ )

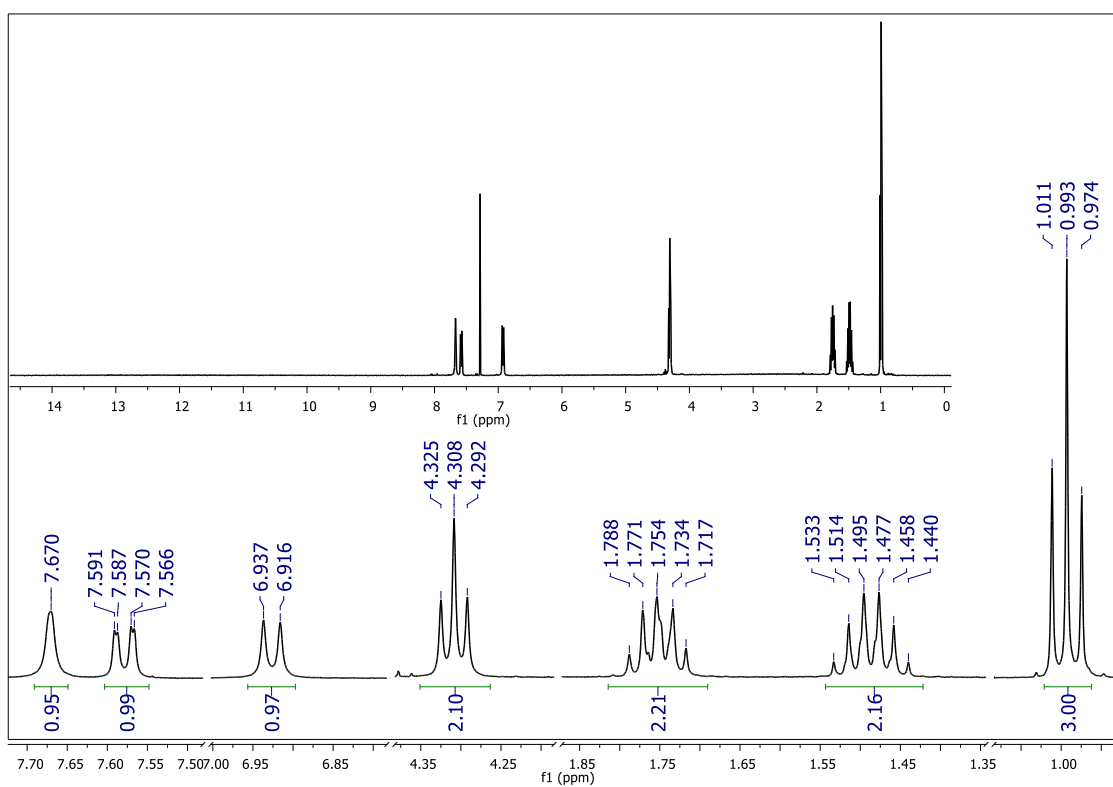

1031

1032

1033 **Figure S26. II)**  $^{13}\text{C}$  NMR spectrum of compound **26** (100 MHz –  $\text{CDCl}_3$ )

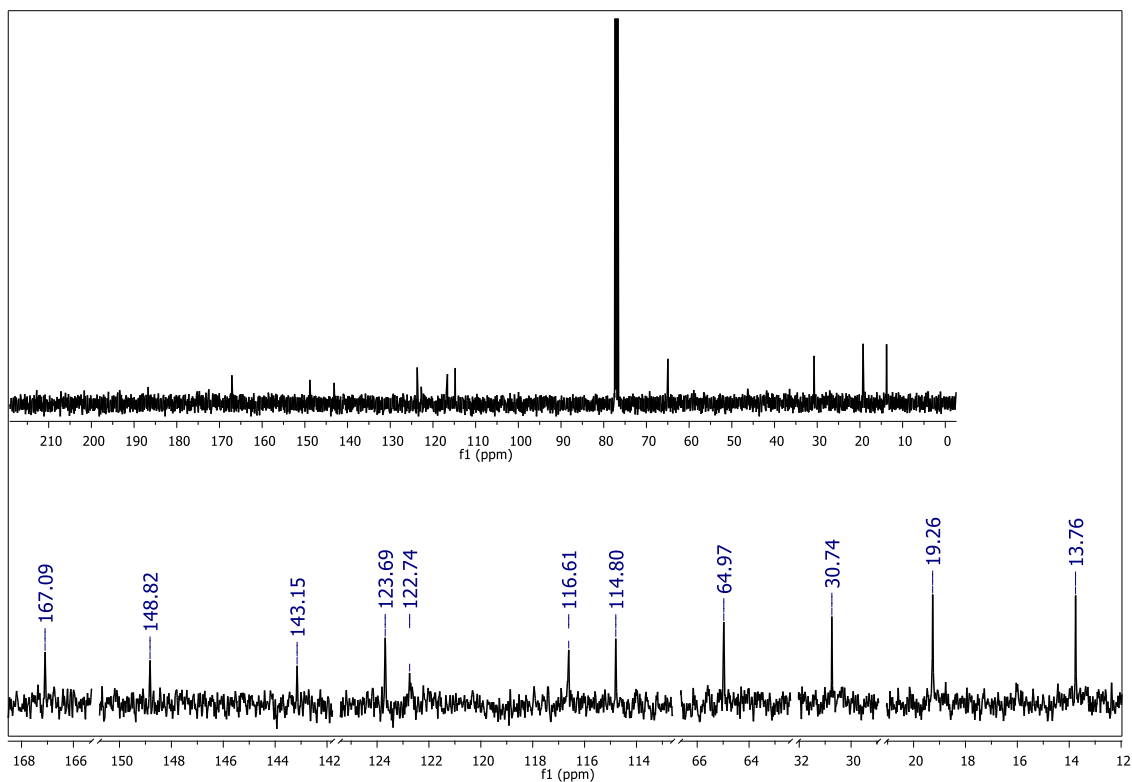

1034

1035 **Figure S26.** III) HPLC chromatogram of compound **26**

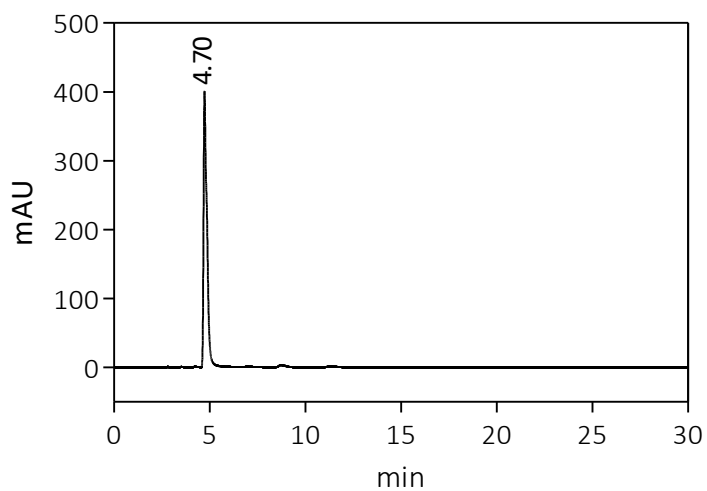

1036

1037

1038

1039

1040

1041

1042

1043

1044

1045

1046

1047

1048

1049

1050

1051

1052

1053 **Figure S27. I)**  $^1\text{H}$  NMR spectrum of compound **27** (400 MHz –  $\text{DMSO-}d_6$ )

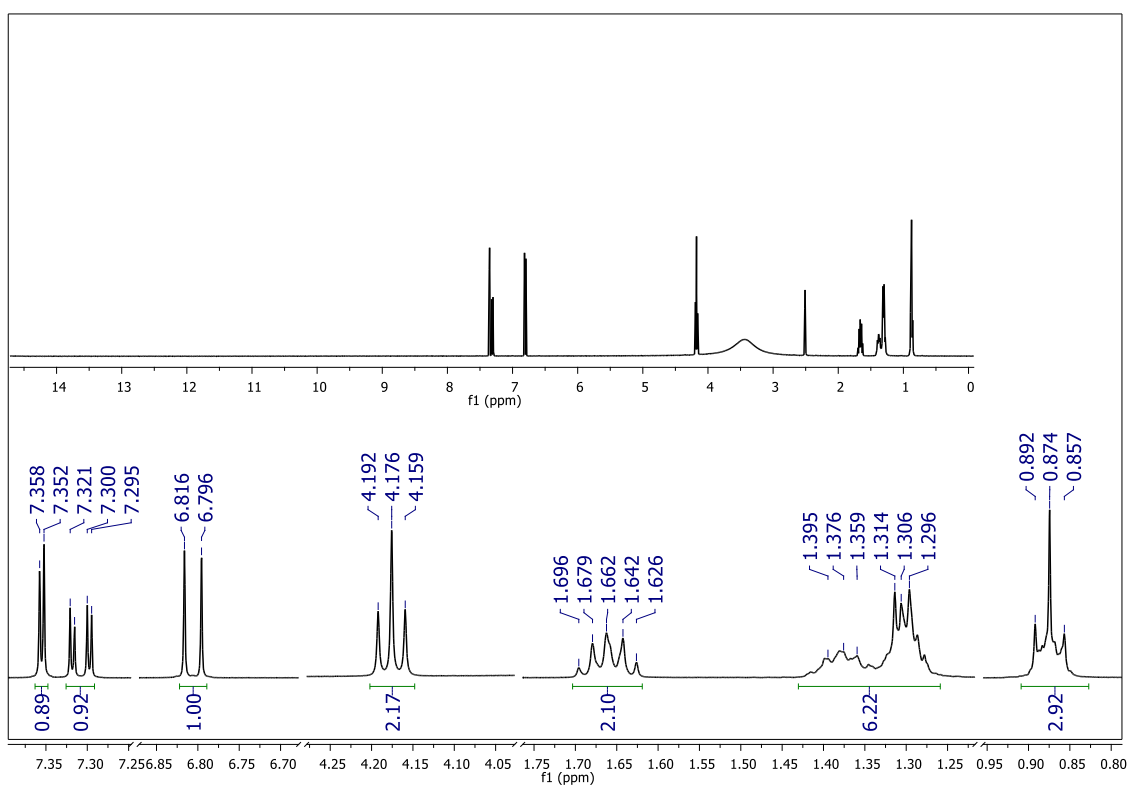

1054

1055

1056 **Figure S27. II)**  $^{13}\text{C}$  NMR spectrum of compound **27** (150 MHz –  $\text{DMSO-}d_6$ )

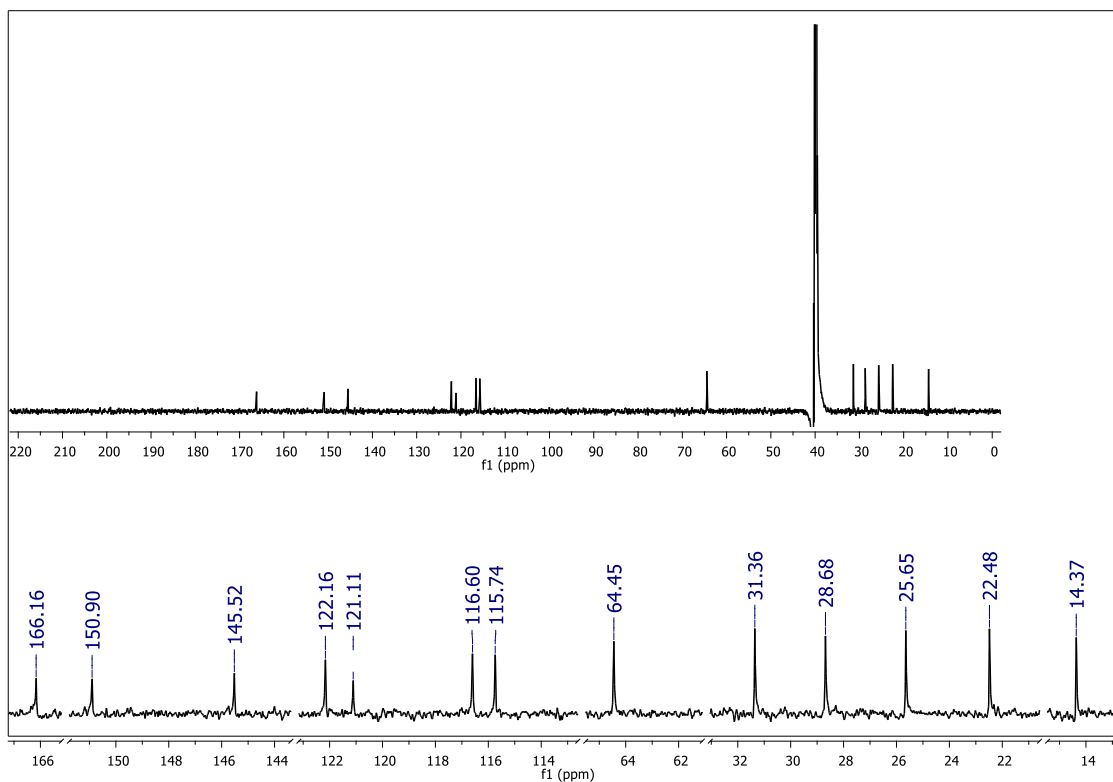

1057



1058 **Figure S27.** III) HPLC chromatogram of compound **27**

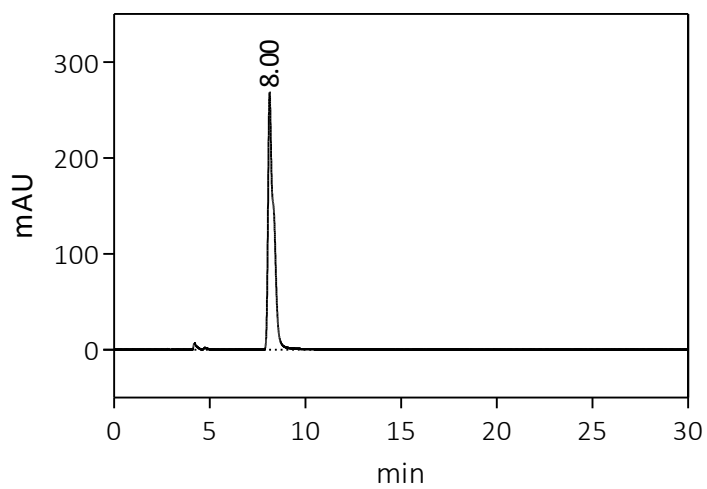

1059

1060

1061

1062

1063

1064

1065

1066

1067

1068

1069

1070

1071

1072

1073

1074

1075

1076 **Figure S28. I)**  $^1\text{H}$  NMR spectrum of compound **28** (600 MHz –  $\text{DMSO-}d_6$ )

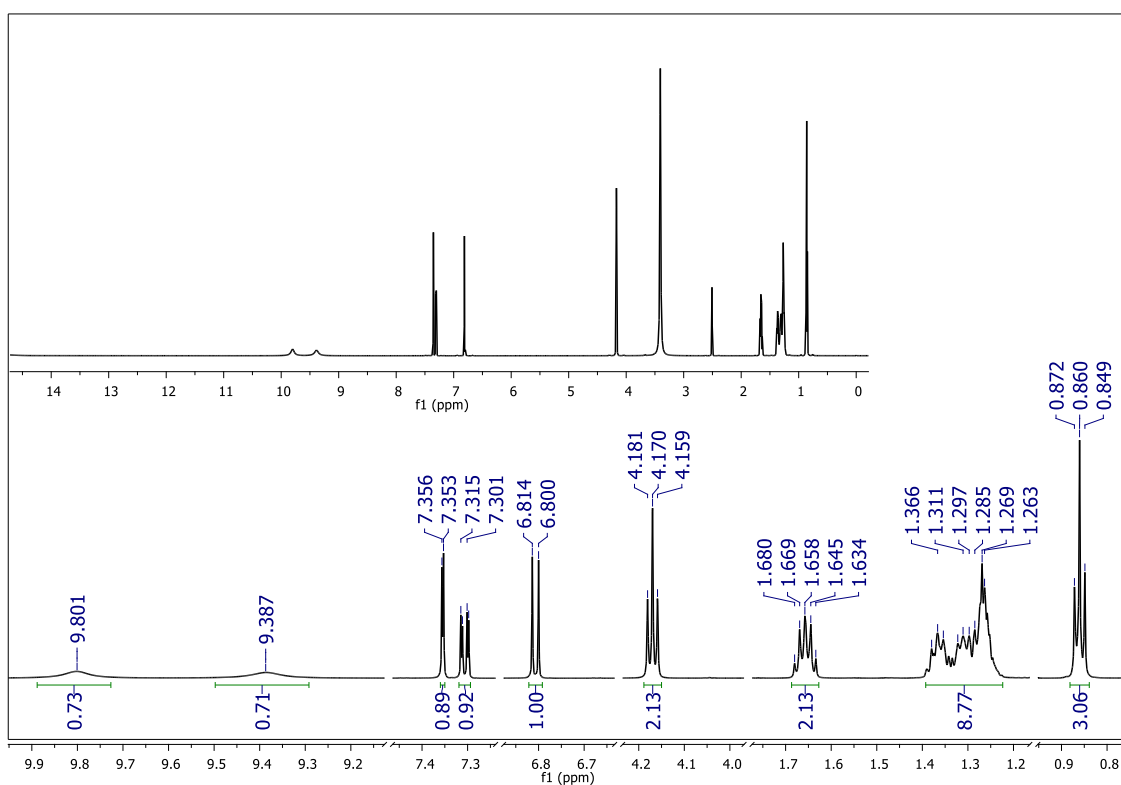

1077

1078

1079 **Figure S28. II)**  $^{13}\text{C}$  NMR spectrum of compound **28** (150 MHz –  $\text{DMSO-}d_6$ )

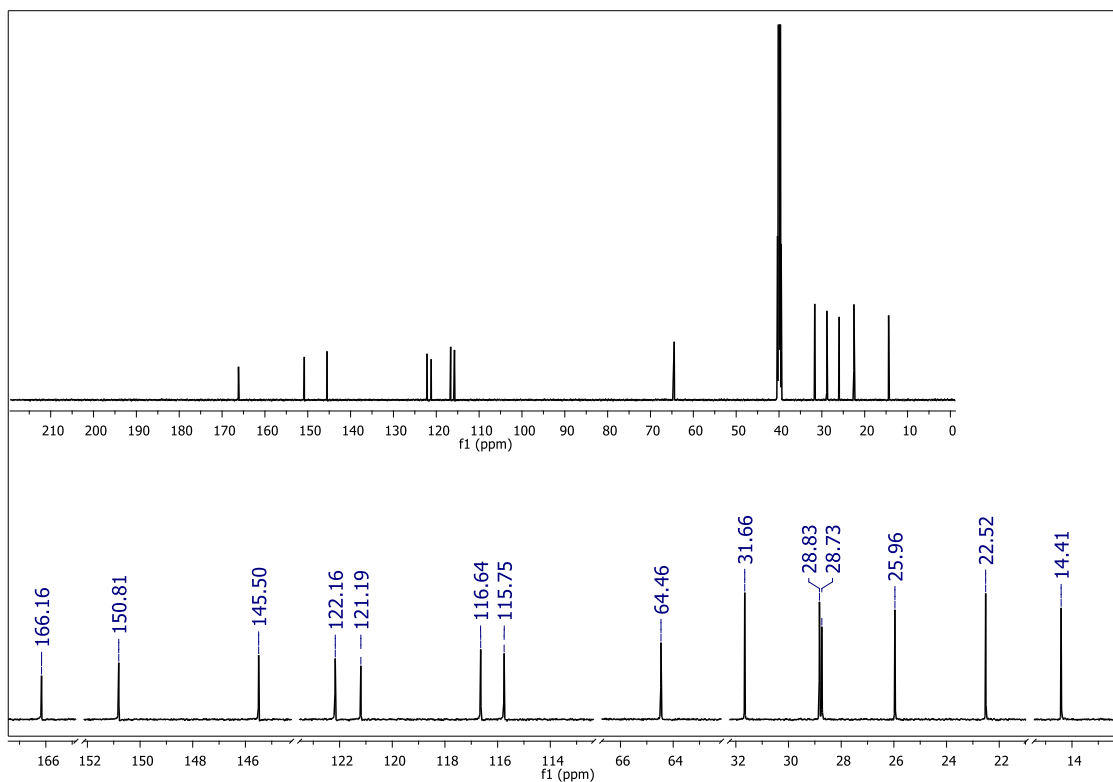

1080

1081 **Figure S28.** III) HPLC chromatogram of compound **28**

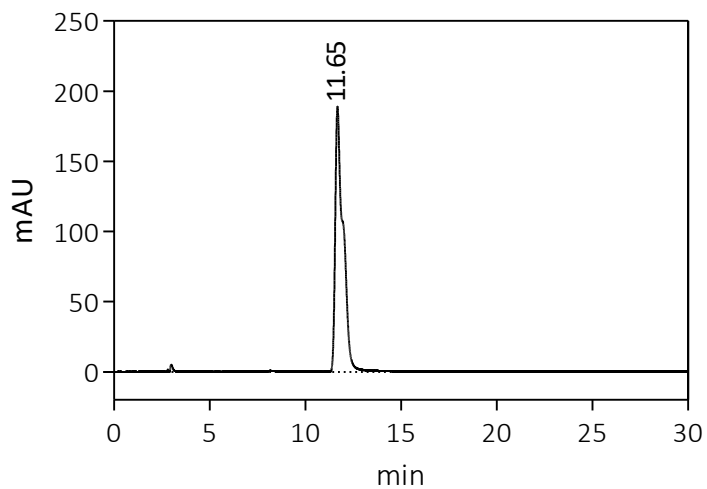

1082

1083

1084

1085

1086

1087

1088

1089

1090

1091

1092

1093

1094

1095

1096

1097

1098

1099 **Figure S29. I)**  $^1\text{H}$  NMR spectrum of compound **29** (400 MHz –  $\text{CDCl}_3$ )

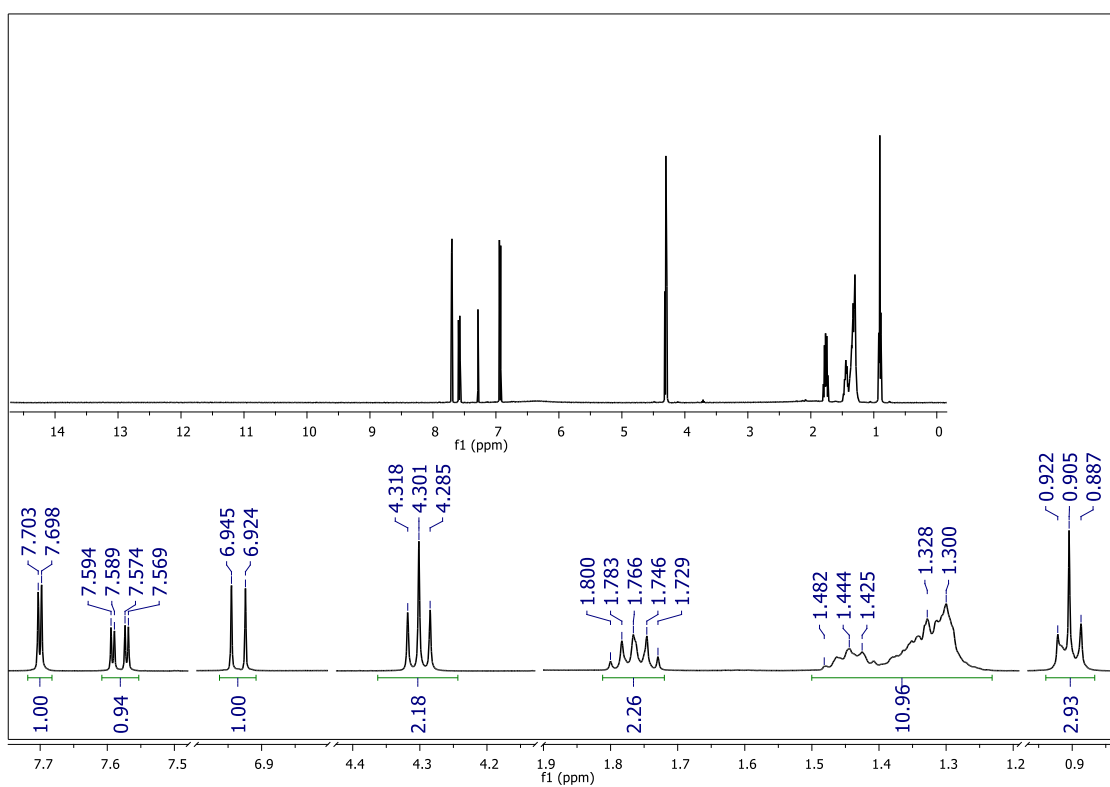

1100

1101

1102 **Figure S29. II)**  $^{13}\text{C}$  NMR spectrum of compound **29** (100 MHz –  $\text{CDCl}_3$ )

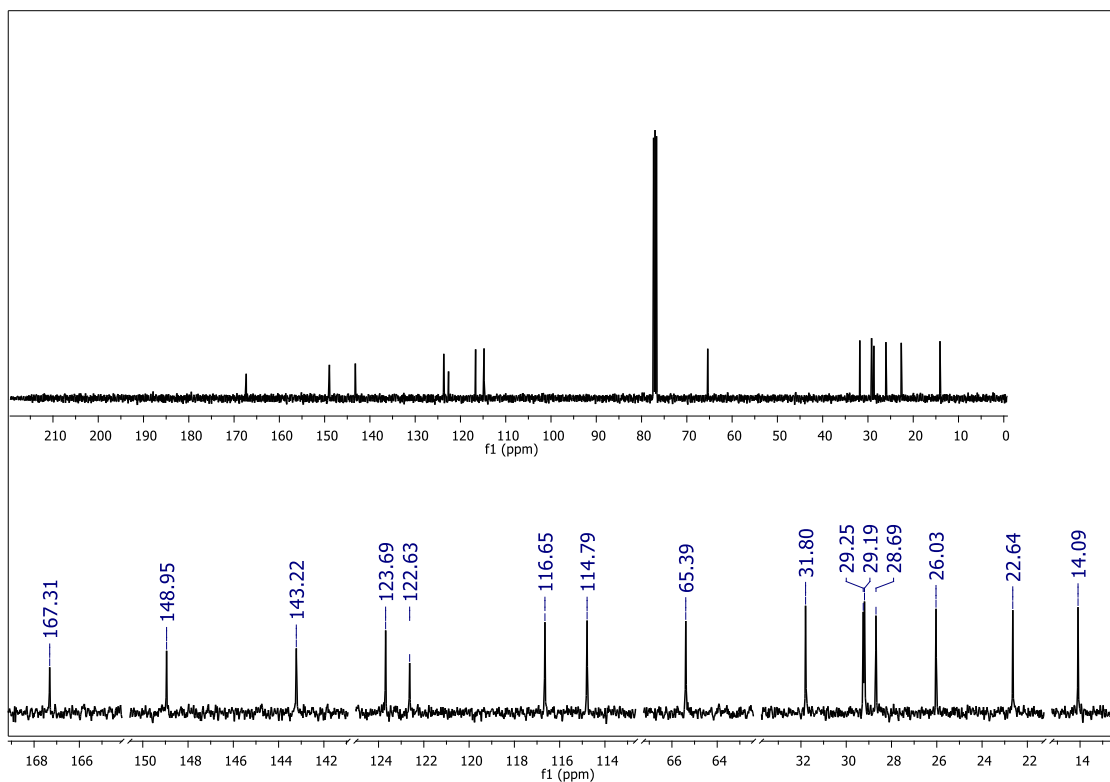

1103

1104 **Figure S29.** III) HPLC chromatogram of compound **29**

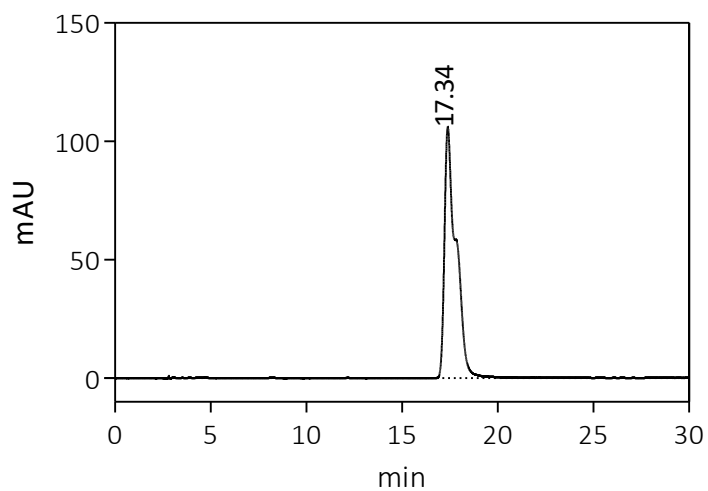

1105

1106

1107

1108

1109

1110

1111

1112

1113

1114

1115

1116

1117

1118

1119

1120

1121

1122 **Figure S30. I)**  $^1\text{H}$  NMR spectrum of compound **30** (300 MHz –  $\text{CDCl}_3$ )

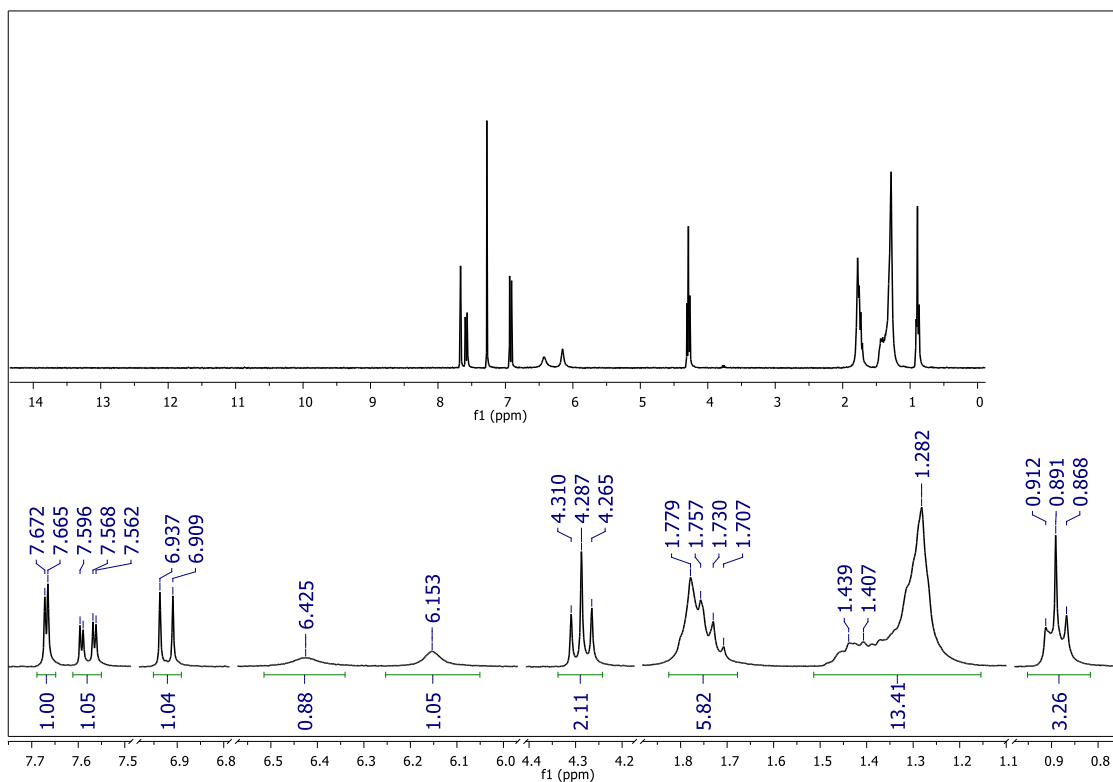

1123

1124

1125 **Figure S30. II)**  $^{13}\text{C}$  NMR spectrum of compound **30** (150 MHz –  $\text{DMSO}-d_6$ )

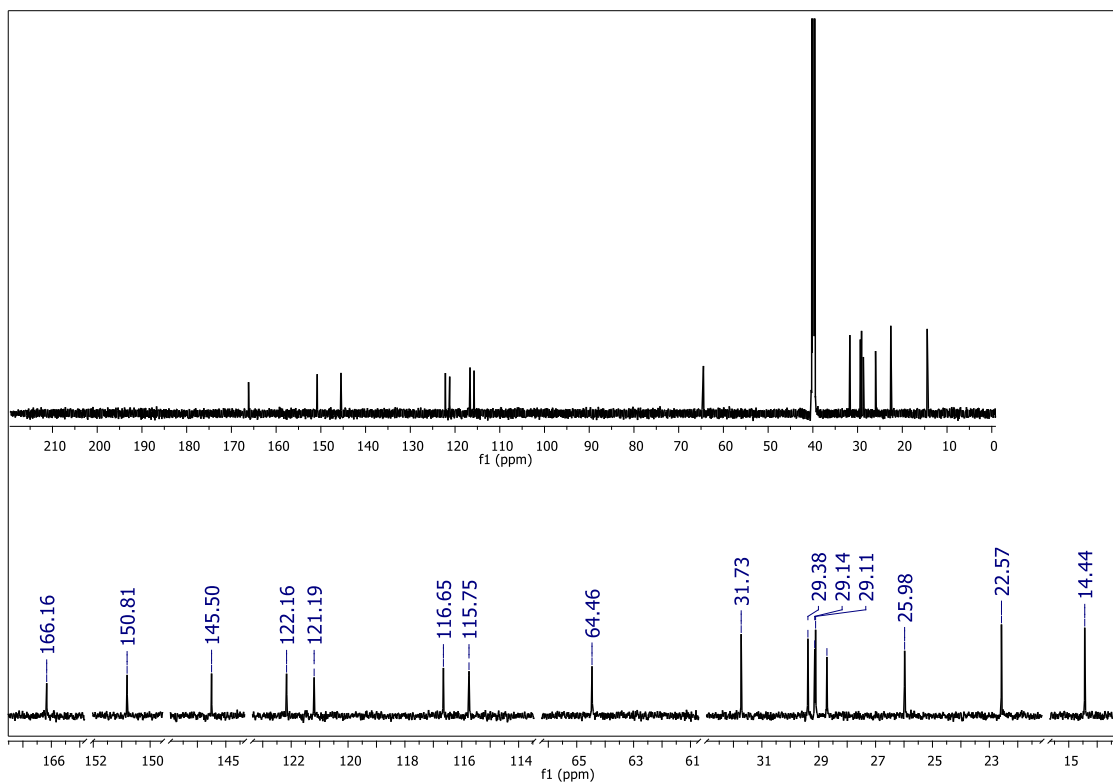

1126

1127 **Figure S30.** III) HPLC chromatogram of compound **30**

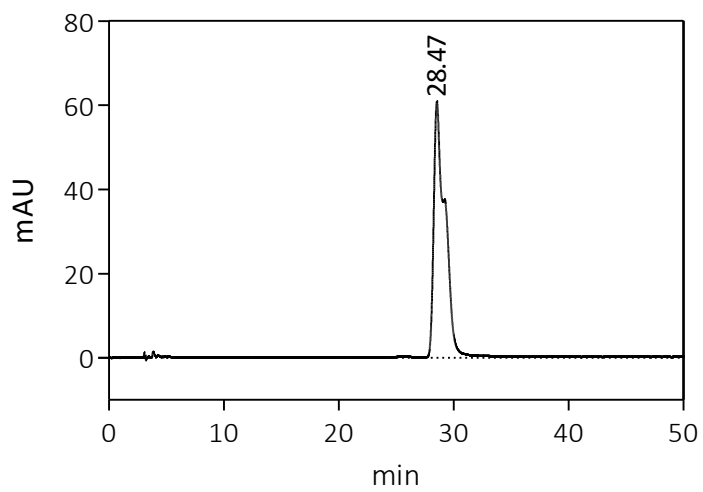

1128

1129

1130

1131

1132

1133

1134

1135

1136

1137

1138

1139

1140

1141

1142

1143

1144

1145 **Figure S31. I)**  $^1\text{H}$  NMR spectrum of compound **31** (400 MHz –  $\text{CDCl}_3$ )

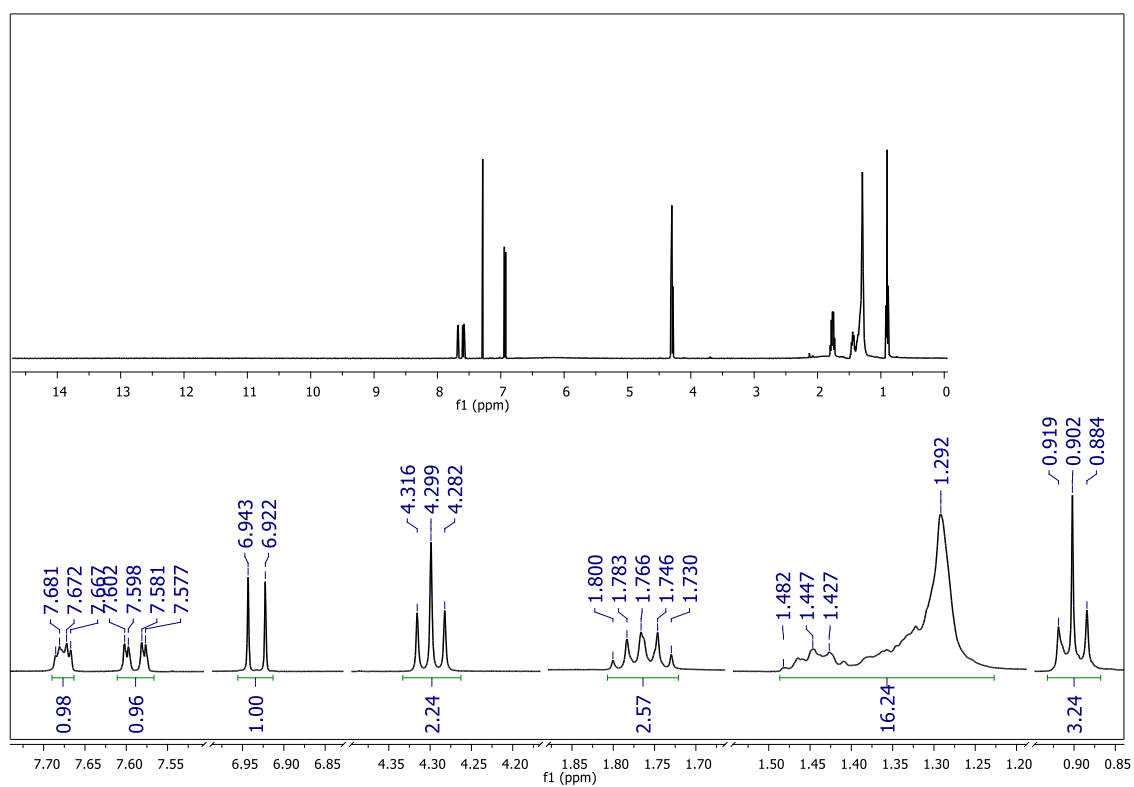

1146

1147

1148 **Figure S31. II)**  $^{13}\text{C}$  NMR spectrum of compound **31** (100 MHz –  $\text{CDCl}_3$ )

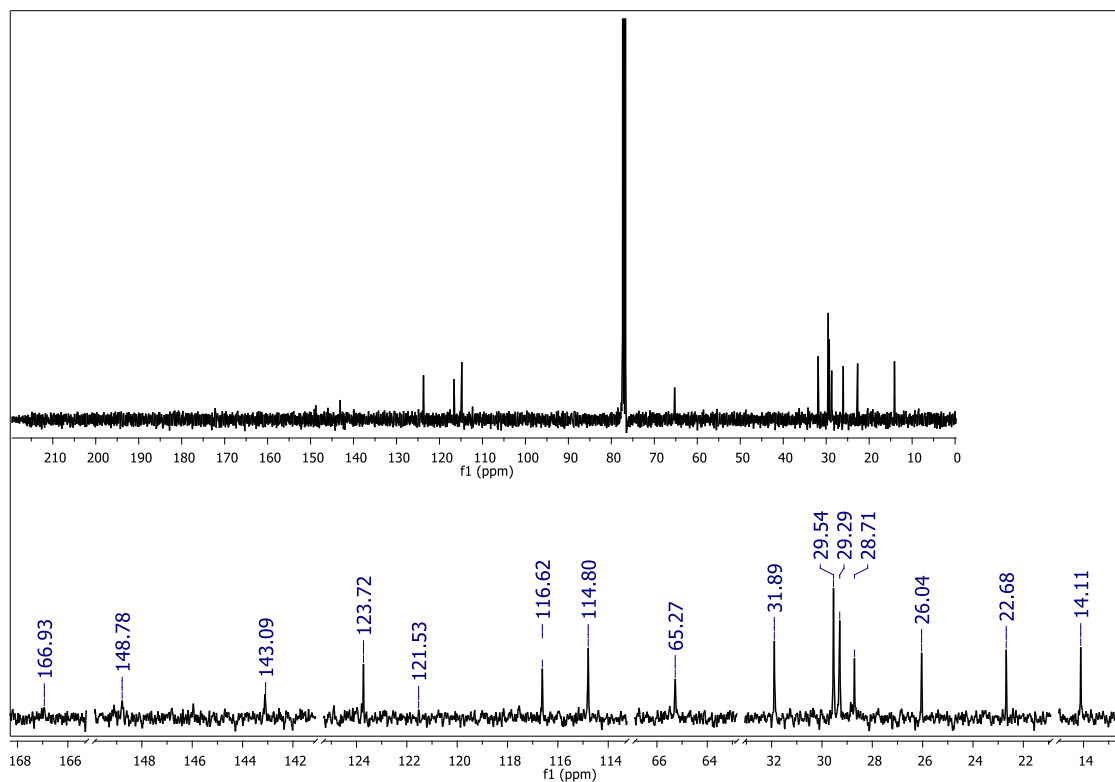

1149



1150 **Figure S31.** III) HPLC chromatogram of compound **31**

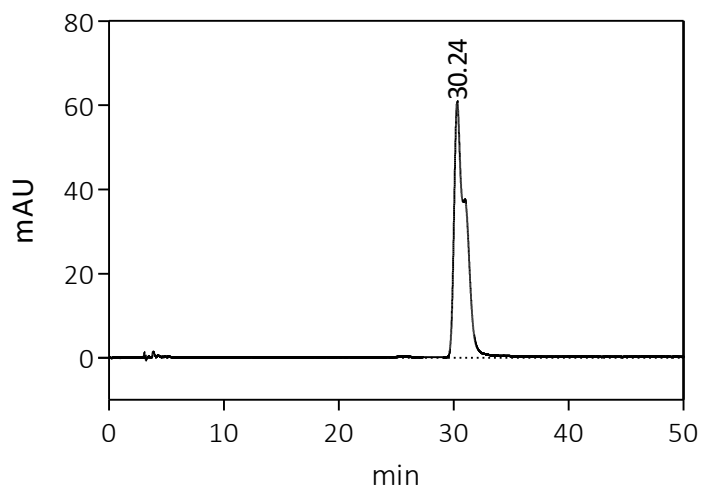

1151

1152

1153

1154

1155

1156

1157

1158

1159

1160

1161

1162

1163

1164

1165

1166

1167

1168 **Figure S32. I)**  $^1\text{H}$  NMR spectrum of compound **32** (300 MHz –  $\text{CDCl}_3$ )

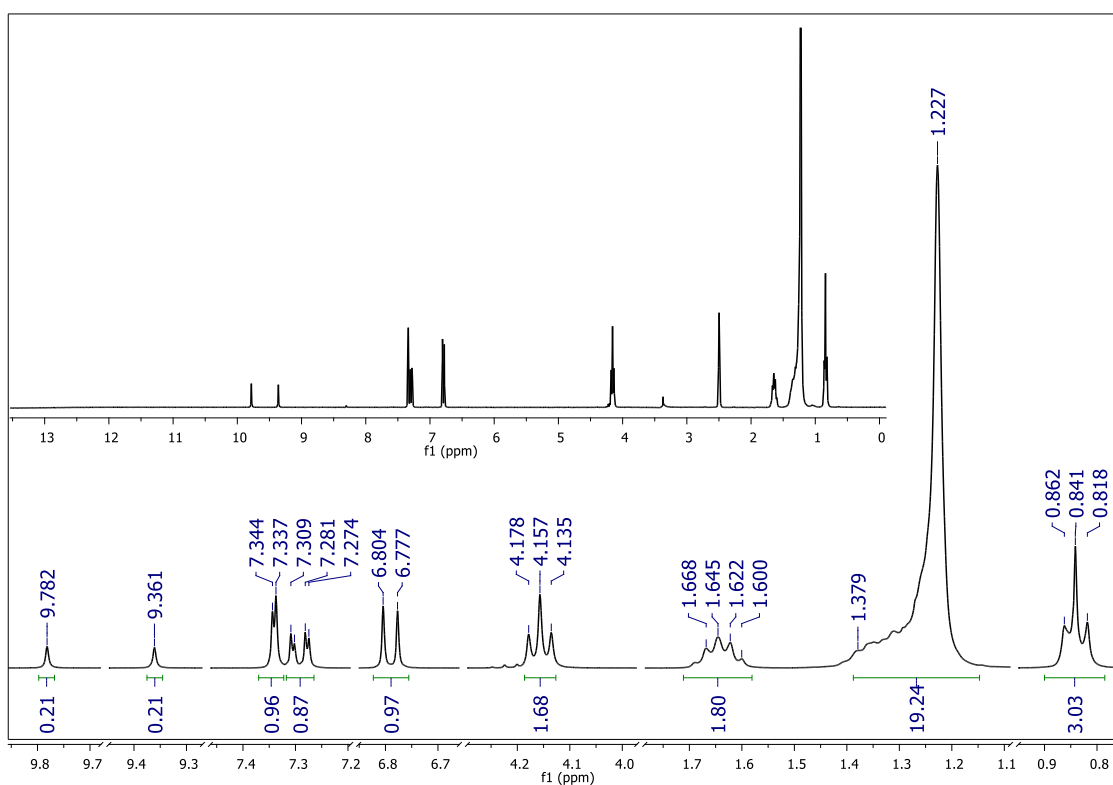

1171 **Figure S32. II)**  $^{13}\text{C}$  NMR spectrum of compound **32** (100 MHz –  $\text{CDCl}_3$ )

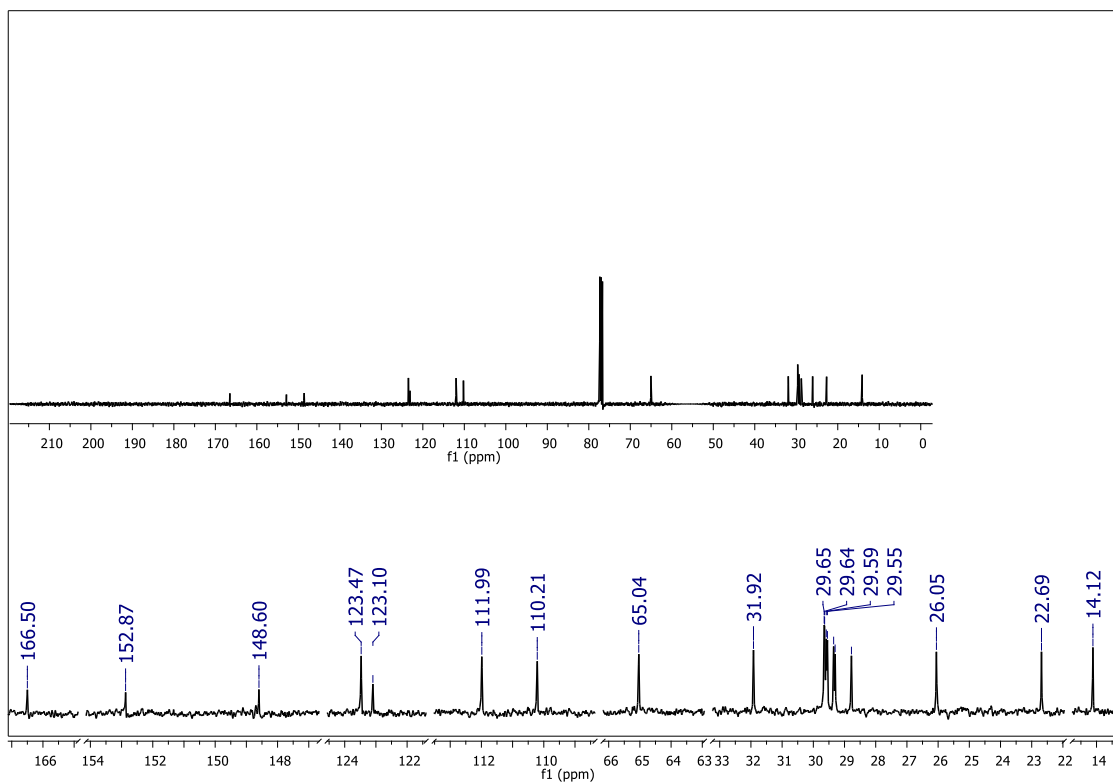

1173 **Figure S32.** III) HPLC chromatogram of compound **32**

1174

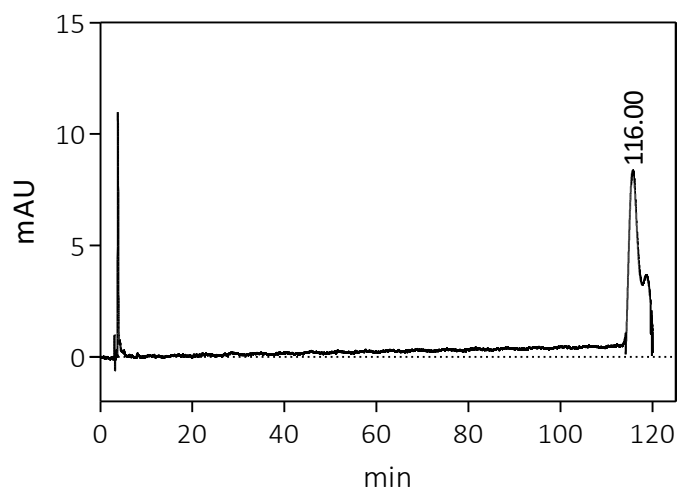

1175

1176

1177

1178

1179

1180

1181

1182

1183

1184

1185

1186

1187

1188

1189

1190

1191 **Figure S33. I)**  $^1\text{H}$  NMR spectrum of compound **33** (300 MHz –  $\text{DMSO-}d_6$ )

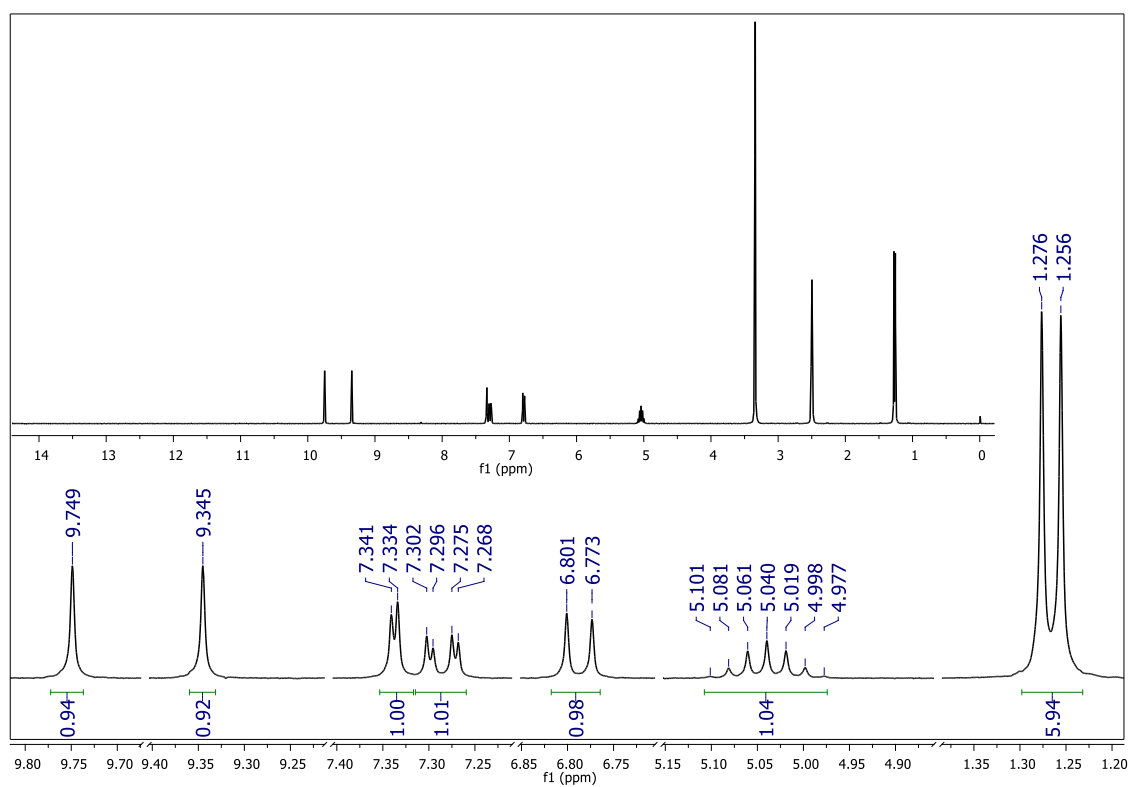

1192

1193

1194 **Figure S33. II)**  $^{13}\text{C}$  NMR spectrum of compound **33** (150 MHz –  $\text{DMSO-}d_6$ )

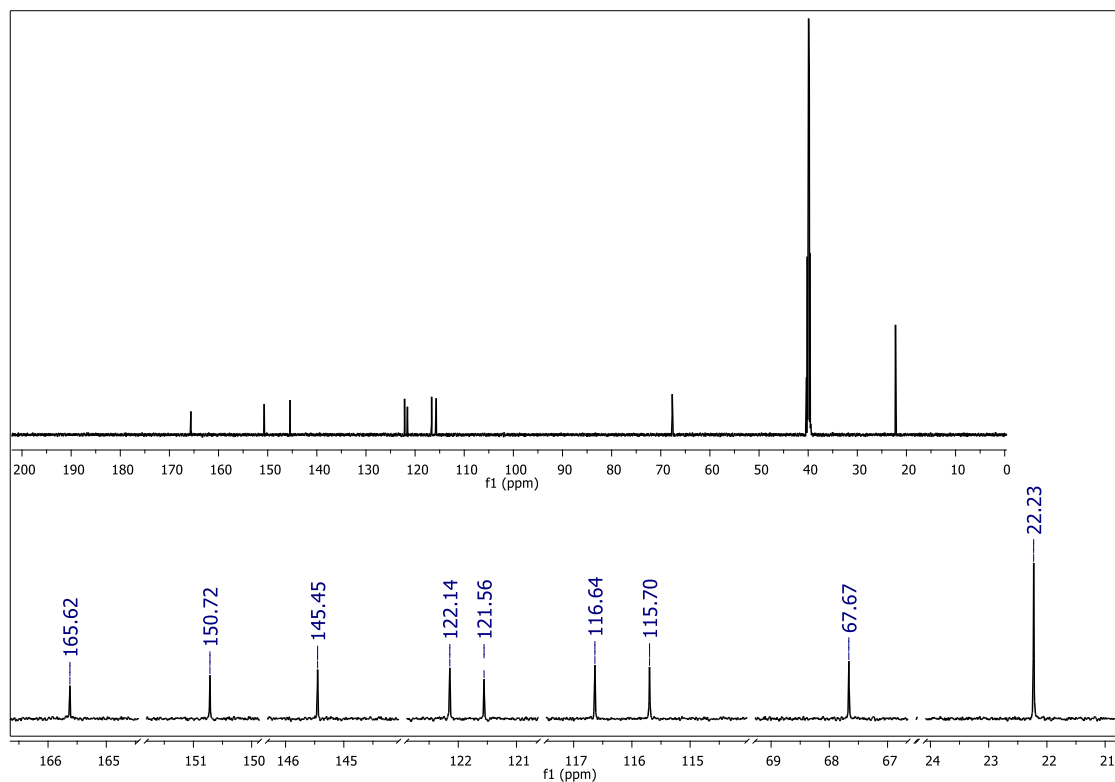

1195

1196 **Figure S33.** III) HPLC chromatogram of compound **33**

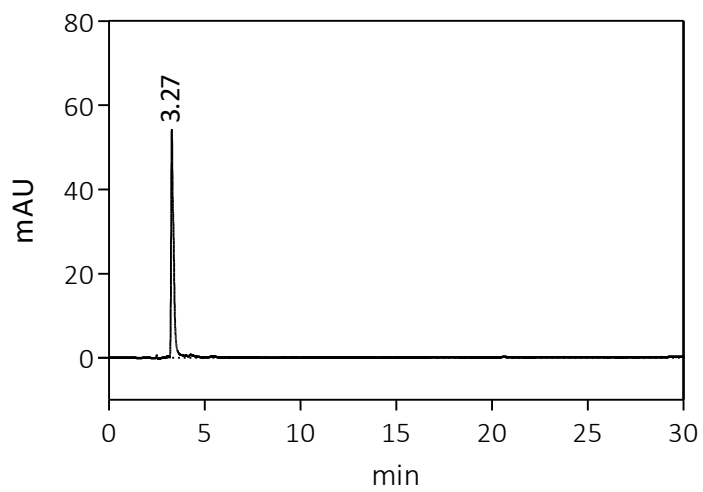

1197

1198

1199

1200

1201

1202

1203

1204

1205

1206

1207

1208

1209

1210

1211

1212

1213

1214 **Figure S34. I)**  $^1\text{H}$  NMR spectrum of compound **34** (300 MHz –  $\text{DMSO-}d_6$ )

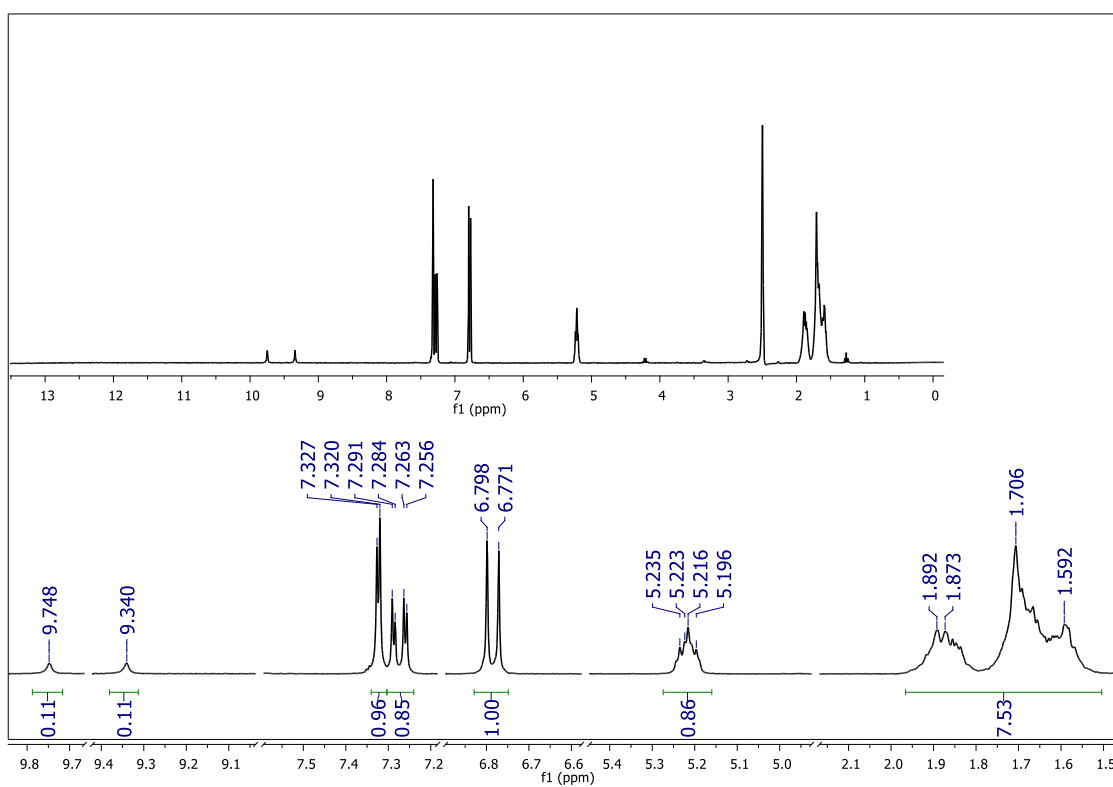

1215

1216

1217 **Figure S34. II)**  $^{13}\text{C}$  NMR spectrum of compound **34** (150 MHz –  $\text{DMSO-}d_6$ )

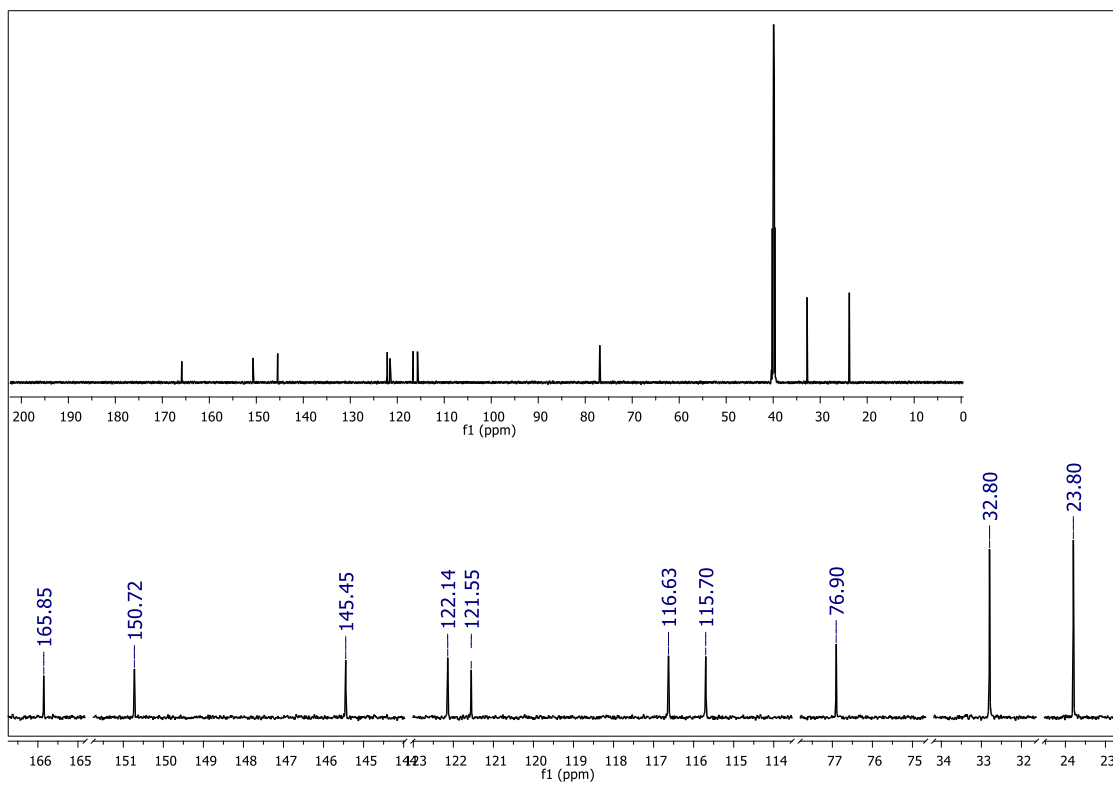

1218

1219 **Figure S34.** III) HPLC chromatogram of compound **34**

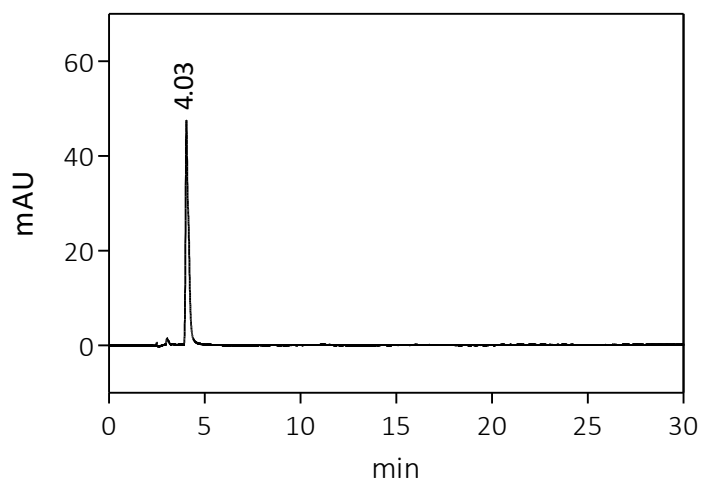

1220

1221

1222

1223

1224

1225

1226

1227

1228

1229

1230

1231

1232

1233

1234

1235

1236

1237 **Figure S35. I)**  $^1\text{H}$  NMR spectrum of compound **35** (600 MHz –  $\text{DMSO-}d_6$ )

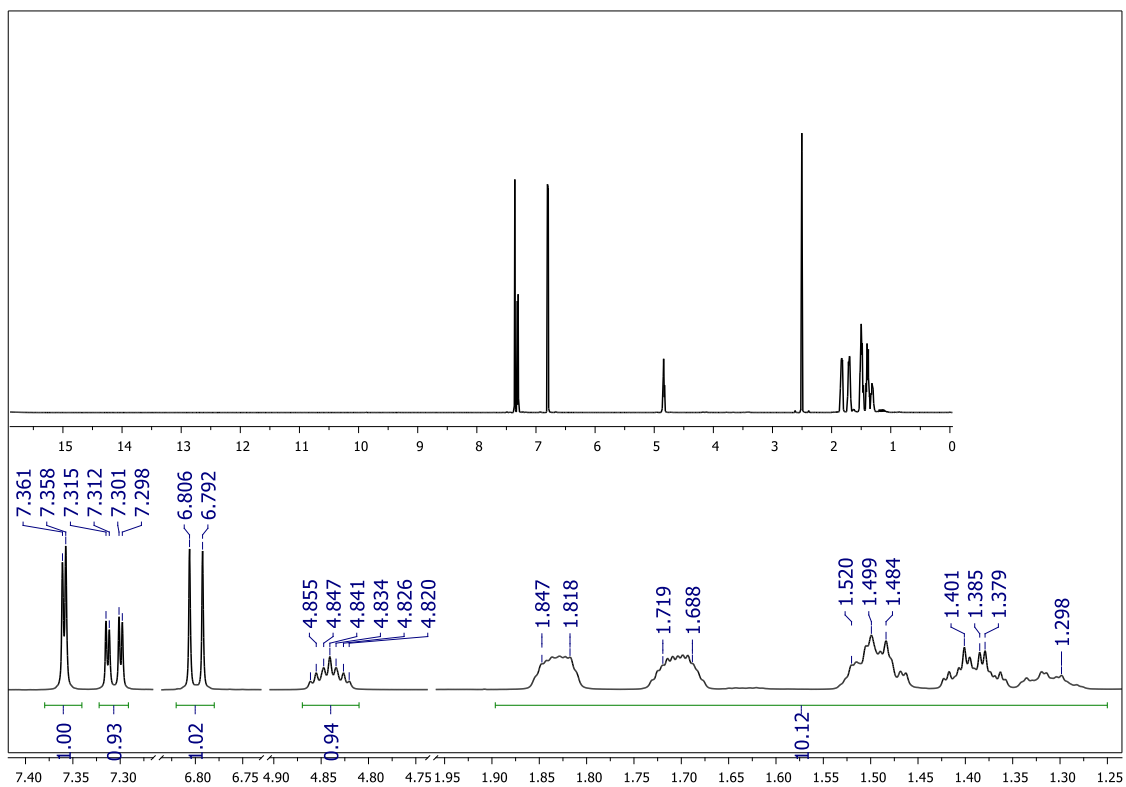

1238

1239

1240 **Figure S35. II)**  $^{13}\text{C}$  NMR spectrum of compound **35** (150 MHz –  $\text{DMSO-}d_6$ )

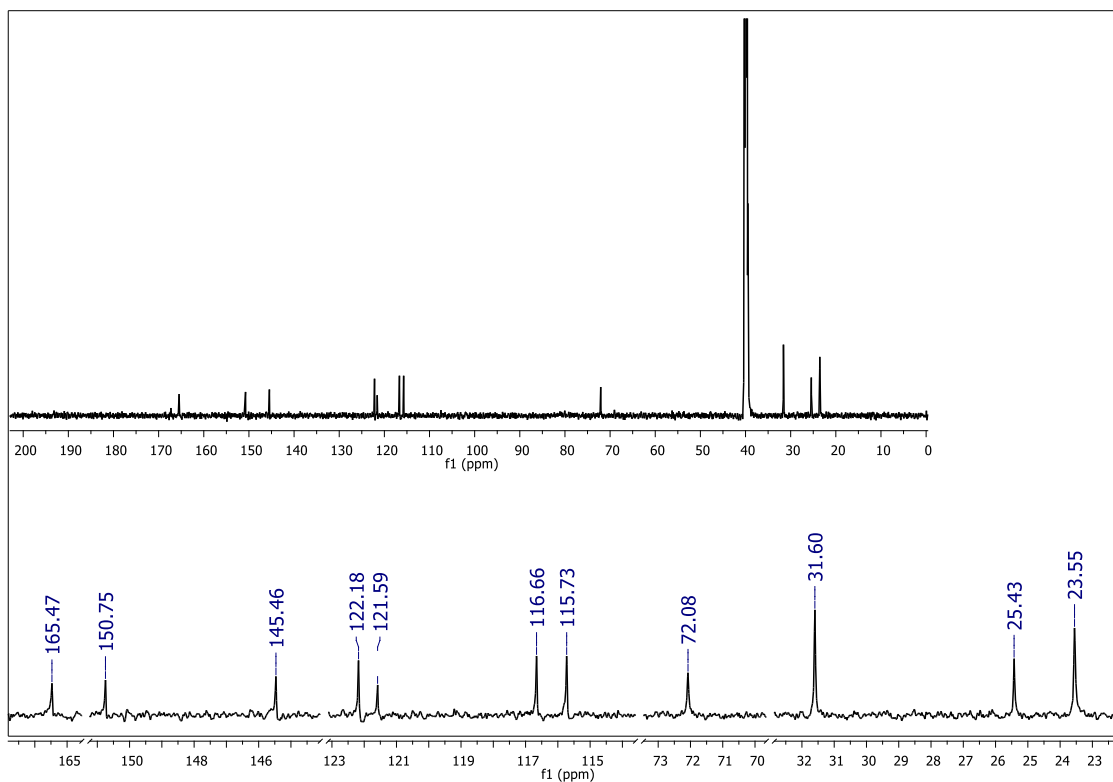

1241



1242 **Figure S35.** III) HPLC chromatogram of compound **35**

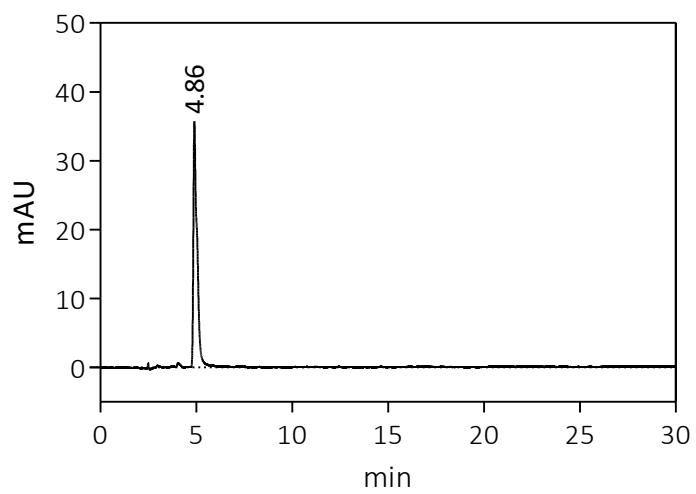

1243

1244

1245

1246

1247

1248

1249

1250

1251

1252

1253

1254

1255

1256

1257

1258

1259

1260 **Figure S36. I)**  $^1\text{H}$  NMR spectrum of compound **36** (300 MHz –  $\text{DMSO-}d_6$ )

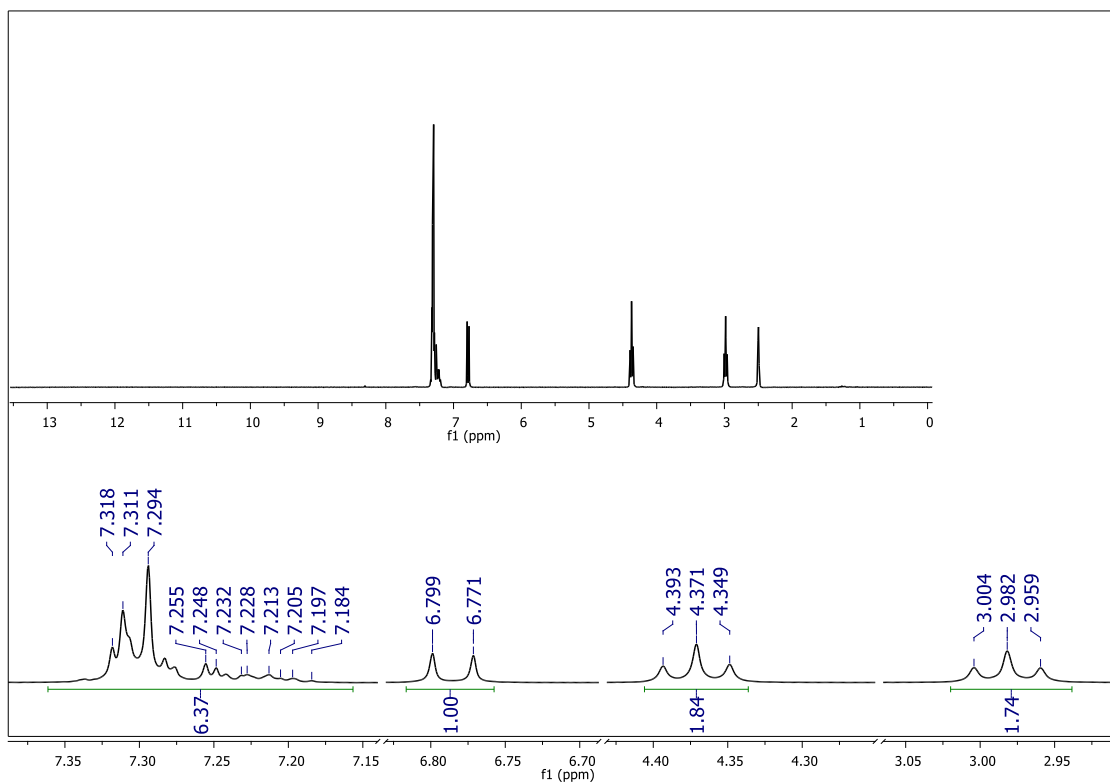

1261

1262

1263 **Figure S36. II)**  $^{13}\text{C}$  NMR spectrum of compound **36** (150 MHz –  $\text{DMSO-}d_6$ )

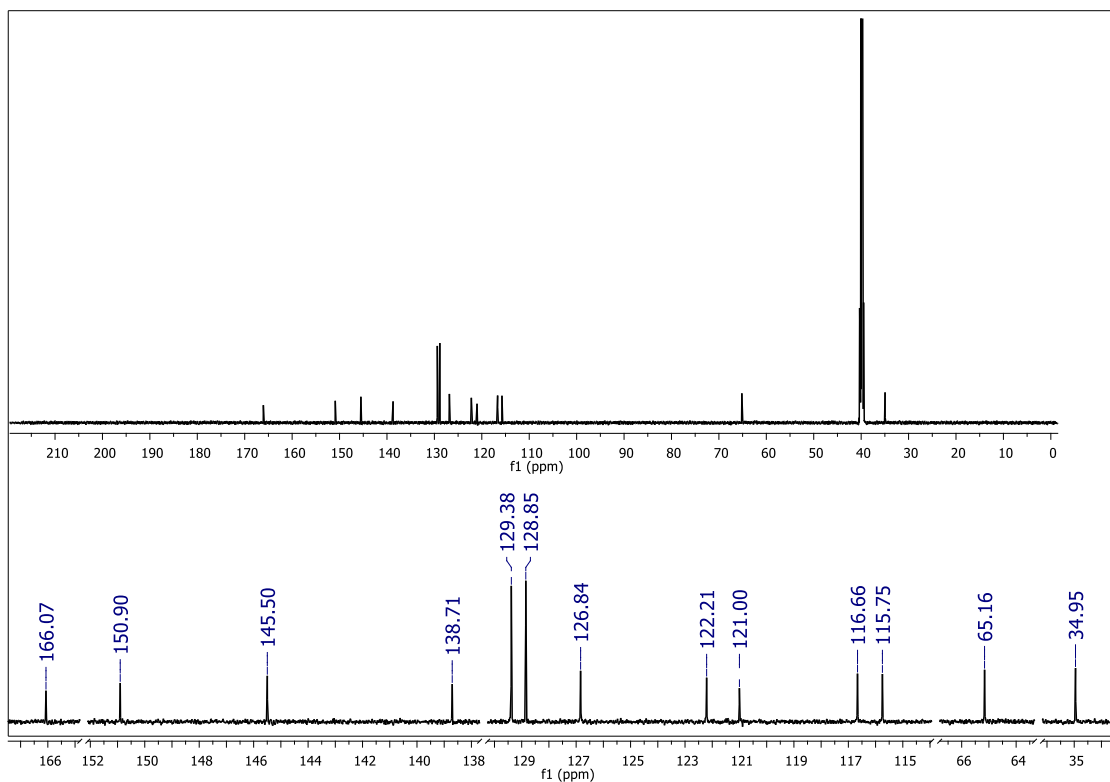

1264

1265 **Figure S36.** III) HPLC chromatogram of compound **36**

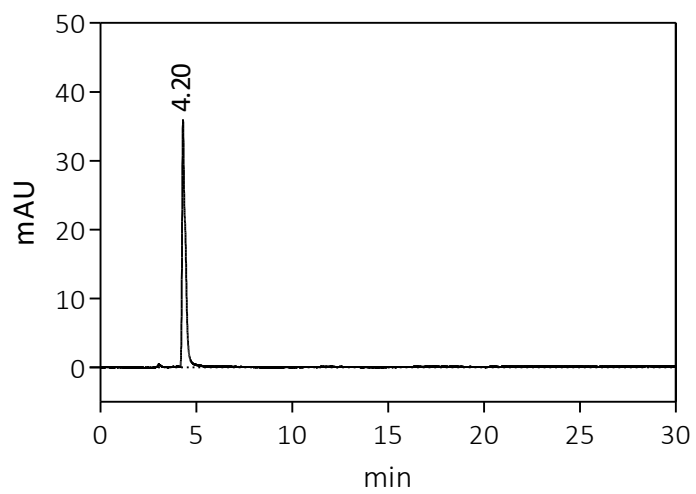

1266
